# Supplementary material for: Organocatalytic sulfa-Michael/aldol cascade: constructing functionalized 2,5-dihydrothiophenes bearing a quaternary carbon stereocenter
Source: Royal Society of Chemistry journal article supplement (doi:10.1039/c8ra04325f), 2018-01-01

## Supporting Information

### Organocatalytic sulfa-Michael/aldol cascade: constructing functionalized 2,5-dihydrothiophenes bearing a quaternary carbon stereocenter

Xiao-Yu Zhu, Mei-Heng Lv, Ya-Nan Zhao, Li-Yan Lan, Wen-Ze Li\* and Lin-Jiu Xiao\*

College of Applied Chemistry, Shenyang University of Chemical Technology, Shenyang 110142,  
China  
E-mail: liwenze@syuct.edu.cn

#### Contents

|                                                                                                            |     |
|------------------------------------------------------------------------------------------------------------|-----|
| 1. General information.....                                                                                | S2  |
| 2. Screening of the reaction conditions.....                                                               | S2  |
| 3. Experimental procedures for the preparation of products <b>3</b> and <b>4</b> .....                     | S3  |
| 4. <sup>1</sup> H, <sup>13</sup> C NMR, HRMS data and HPLC traces of compounds <b>3</b> and <b>4</b> ..... | S4  |
| 5. X-Ray structure of <b>3a</b> .....                                                                      | S18 |
| 6. DTF calculation.....                                                                                    | S18 |
| 7. <sup>1</sup> H, <sup>13</sup> C NMR spectra of compounds <b>3</b> and <b>4</b> .....                    | S41 |

## 1. General Information

Unless otherwise noted, materials were used as commercial suppliers and used without further purification. All the solvents were treated according to general methods. All reactions were monitored by TLC analysis with silica gel-coated plates. Flash column chromatography was performed using 200-300 mesh silica gel.  $^1\text{H}$  NMR and  $^{13}\text{C}$  NMR spectra were recorded on Varian-Mercury 400/600 (400/600 MHz) spectrometers. Chemical shifts ( $\delta$ ) are reported in parts per million (ppm) relative to residual solvent signals ( $\text{CHCl}_3$ : 7.26 ppm for  $^1\text{H}$  NMR; 77.0 ppm for  $^{13}\text{C}$  NMR). Data are reported as follows: chemical shift ( $\delta$ ), multiplicity (s = singlet, d = doublet, t = triplet, q = quartet, dd = doublet of doublets, m = multiplet), coupling constants (Hz). Mass spectra were measured on a Finnigan Trace MS spectrometer (EI) or API 2000 LC/MS/MS (ESI-MS). Enantiomeric ratios were determined by HPLC with chiral columns (chiralpak AS-H column, chiralpak AD-H column, chiralpak OJ-H column or chiralcel OD-H column) with hexane and *i*-PrOH as solvents. Optical rotations were measured with a polarimeter.

## 2. Screening of the reaction conditions

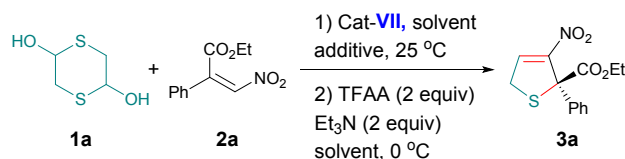

**Table 1. Solvent screening**

| entry | <b>1a</b><br>(mmol) | <b>2a</b><br>(mmol) | <b>VII</b><br>(mmol) | additive | Solvent<br>(2 mL)                   | time<br>(h) | <b>3a</b> |        |
|-------|---------------------|---------------------|----------------------|----------|-------------------------------------|-------------|-----------|--------|
|       |                     |                     |                      |          |                                     |             | yield (%) | ee (%) |
| 1     | 0.18                | 0.3                 | 0.03                 | none     | $\text{CH}_2\text{Cl}_2$            | 24          | 64        | 60     |
| 2     | 0.18                | 0.3                 | 0.03                 | none     | $\text{ClCH}_2\text{CH}_2\text{Cl}$ | 24          | 55        | 58     |
| 3     | 0.18                | 0.3                 | 0.03                 | none     | $\text{CHCl}_3$                     | 24          | 69        | 71     |
| 4     | 0.18                | 0.3                 | 0.03                 | none     | toluene                             | 24          | 56        | 62     |
| 5     | 0.18                | 0.3                 | 0.03                 | none     | benzene                             | 24          | 54        | 68     |
| 6     | 0.18                | 0.3                 | 0.03                 | none     | xylene                              | 24          | 61        | 60     |
| 7     | 0.18                | 0.3                 | 0.03                 | none     | THF                                 | 24          | 35        | 48     |
| 8     | 0.18                | 0.3                 | 0.03                 | none     | $\text{Et}_2\text{O}$               | 24          | 68        | 66     |
| 9     | 0.18                | 0.3                 | 0.03                 | none     | 1,4-dioxane                         | 24          | 67        | 64     |
| 10    | 0.18                | 0.3                 | 0.03                 | none     | $\text{CH}_3\text{OH}$              | 24          | 44        | 3      |
| 11    | 0.18                | 0.3                 | 0.03                 | none     | <i>i</i> -PrOH                      | 24          | 46        | 5      |
| 12    | 0.18                | 0.3                 | 0.03                 | none     | $\text{CH}_3\text{CN}$              | 24          | 43        | 12     |

**Table 2. Concentration, equivalent of additive and catalyst screening**

| entry | <b>1a</b><br>(mmol) | <b>2a</b><br>(mmol) | <b>VII</b><br>(mmol) | 5Å MS<br>(mg) | CHCl <sub>3</sub><br>(mL) | time<br>(h) | <b>3a</b> |        |
|-------|---------------------|---------------------|----------------------|---------------|---------------------------|-------------|-----------|--------|
|       |                     |                     |                      |               |                           |             | yield (%) | ee (%) |
| 1     | 0.18                | 0.3                 | 0.03                 | 80            | 2 mL                      | 24          | 68        | 75     |
| 2     | 0.18                | 0.3                 | 0.03                 | 90            | 2 mL                      | 24          | 70        | 77     |
| 3     | 0.18                | 0.3                 | 0.03                 | 100           | 2 mL                      | 24          | 69        | 74     |
| 4     | 0.18                | 0.3                 | 0.015                | 90            | 2 mL                      | 48          | 59        | 73     |
| 5     | 0.18                | 0.3                 | 0.045                | 90            | 2 mL                      | 24          | 68        | 75     |
| 6     | 0.18                | 0.3                 | 0.03                 | 90            | 1 mL                      | 20          | 61        | 70     |
| 7     | 0.18                | 0.3                 | 0.03                 | 90            | 1.5 mL                    | 24          | 70        | 75     |
| 8     | 0.18                | 0.3                 | 0.03                 | 90            | 3 mL                      | 24          | 63        | 73     |

### 3. Experimental Procedures for the preparation of products 3 and 4

$\alpha$ -Aryl- $\beta$ -nitroacrylates **2** were prepared according to the literature procedures.<sup>[1]</sup> The 2,5-dihydrothiophenes **3** and derivative **4** were prepared as the following procedure.

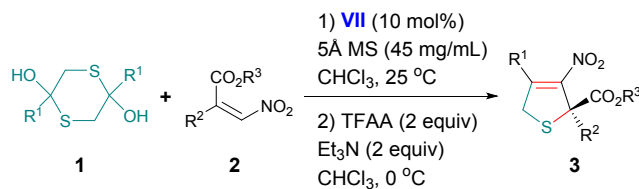

To a stirred solution of  $\beta$ -nitroacrylates **2** (0.3 mmol), catalyst **VII** (0.03 mmol), 5Å MS (45 mg/mL, 90 mg) in distilled chloroform (2 mL), the substrate **1** (0.18 mmol) was added at room temperature. After completed (monitored by TLC analysis), the mixture was cooled to 0 °C, then TFAA (0.6 mmol) was added and Et<sub>3</sub>N (0.6 mmol) was dropped slowly. The reaction mixture was kept stirring until completed (monitored by TLC analysis), the crude product was washed with H<sub>2</sub>O (2 mL  $\times$  3), dried with MgSO<sub>4</sub>, then purified by column chromatography on silica gel (PE/EA = 20/1~10/1 as eluant) to afford the corresponding product **3**.

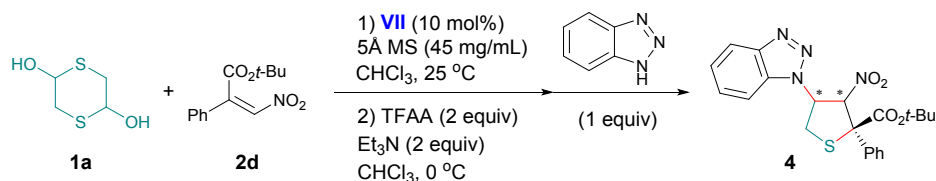

To a solution of  $\beta$ -nitroacrylate **2d** (0.3 mmol), catalyst **VII** (0.03 mmol), 5Å MS (45 mg/mL, 90 mg) in distilled chloroform (2 mL), the 1,4-dithiane-2,5-diol **1a** (0.18 mmol) was added at room temperature. After completed (monitored by TLC analysis), the mixture was cooled to 0 °C, then TFAA (0.6 mmol) was added and Et<sub>3</sub>N (0.6 mmol) was dropped slowly. The reaction was kept stirring until completed (monitored by TLC analysis), then benzotriazole (0.3 mmol) was added directly. After

completed (monitored by TLC analysis), the mixture was washed with H<sub>2</sub>O (2 mL × 3), dried with MgSO<sub>4</sub>, then purified by column chromatography on silica gel (PE/EA = 10/1~5/1 as eluant) to afford the corresponding product 4.

#### 4. <sup>1</sup>H, <sup>13</sup>C NMR, HRMS data and HPLC traces of compounds 3 and 4

##### (S)-ethyl-3-nitro-2-phenyl-2,5-dihydrothiophene-2-carboxylate (3a)

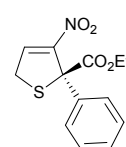 Pale yellow oil, yield: 70%, ee: 77%. <sup>1</sup>H NMR (400 MHz, CDCl<sub>3</sub>): δ 7.64 (d, *J* = 7.8 Hz, 2H), 7.39 (t, *J* = 2.8 Hz, 1H), 7.34 (t, *J* = 7.6 Hz, 2H), 7.28 (d, *J* = 6.7 Hz, 1H), 4.30-4.40 (m, 2H), 4.00-4.14 (m, 2H), 1.31 (t, *J* = 7.1 Hz, 3H) ppm. <sup>13</sup>C NMR (100 MHz, CDCl<sub>3</sub>): δ 169.4, 153.7, 137.7, 128.6, 128.1, 127.9, 121.0, 65.9, 62.5, 33.2, 13.8 ppm. FTIR (KBr, cm<sup>-1</sup>): 3036, 2984, 2932, 2908, 1736, 1664, 1540, 1425, 1334, 1264, 1020, 804, 749, 695. HRMS (ESI): Calcd for C<sub>13</sub>H<sub>13</sub>NO<sub>4</sub>S [M+Na]<sup>+</sup>: 302.0463. Found: 302.0458. [α]<sub>D</sub><sup>20</sup> = +15.6 (C = 1.0, CHCl<sub>3</sub>). HPLC (Chiralpak AD-H column, *i*-PrOH/hexane = 10:90, 1.0 mL/min, 25 °C, 254 nm, *t*<sub>major</sub> = 11.036 min, *t*<sub>minor</sub> = 9.262 min)

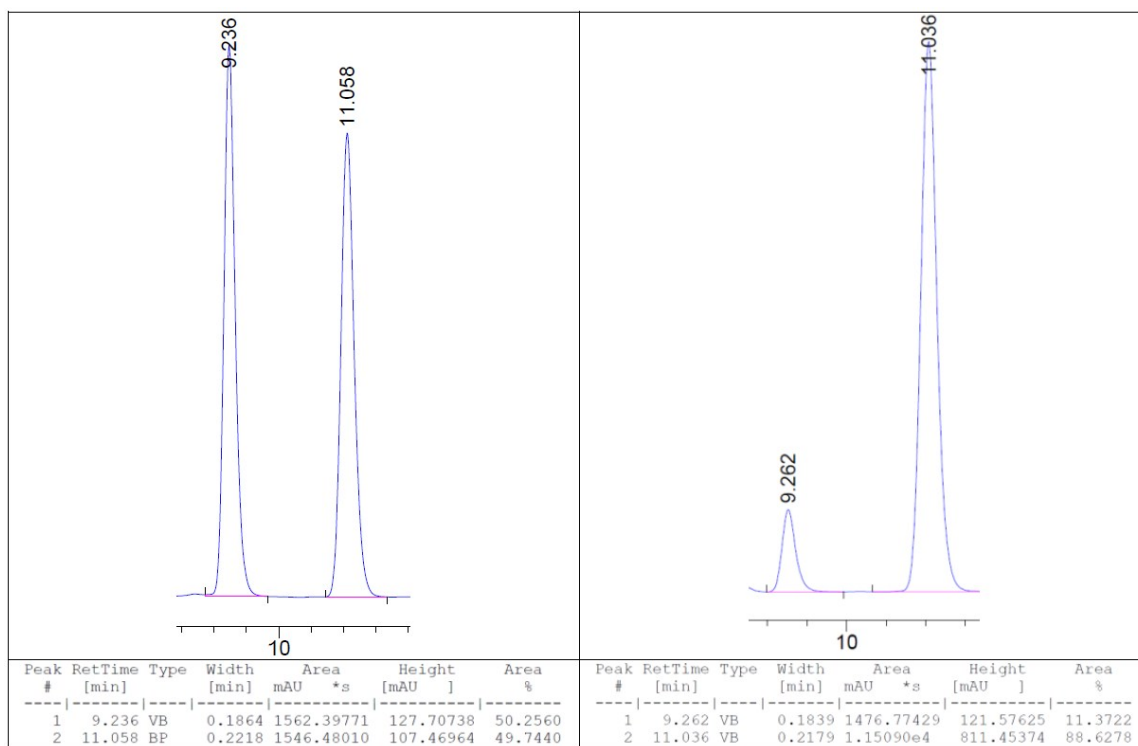

##### (S)-benzyl-3-nitro-2-phenyl-2,5-dihydrothiophene-2-carboxylate (3b)

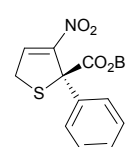 Colorless oil, yield: 68%, ee: 66%. <sup>1</sup>H NMR (400 MHz, CDCl<sub>3</sub>): δ 7.62 (d, *J* = 7.4 Hz, 2H), 7.27-7.39 (m, 9H), 5.32 (d, *J* = 3.4 Hz, 2H), 3.99-4.14 (m, 2H) ppm. <sup>13</sup>C NMR (100 MHz, CDCl<sub>3</sub>): δ 164.1, 143.2, 134.1, 131.9, 129.4, 129.3, 128.9, 127.4, 126.7, 70.6, 53.4, 21.3 ppm. FTIR (KBr, cm<sup>-1</sup>): 3028, 2982, 2931, 2902, 1743, 1673, 1597, 1533,

1348, 1262, 1100, 811, 751, 693. HRMS (ESI): Calcd for C<sub>18</sub>H<sub>15</sub>NO<sub>4</sub>S [M+Na]<sup>+</sup>: 364.0619. Found: 364.0614. [α]<sub>D</sub><sup>16</sup> = +31.6 (C = 1.0, CHCl<sub>3</sub>). HPLC (Chiralpak AD-H column, hexane/2-propanol = 90:10, 1.0 mL/min, 25 °C, 254 nm, t<sub>major</sub> = 17.281 min, t<sub>minor</sub> = 14.909 min)

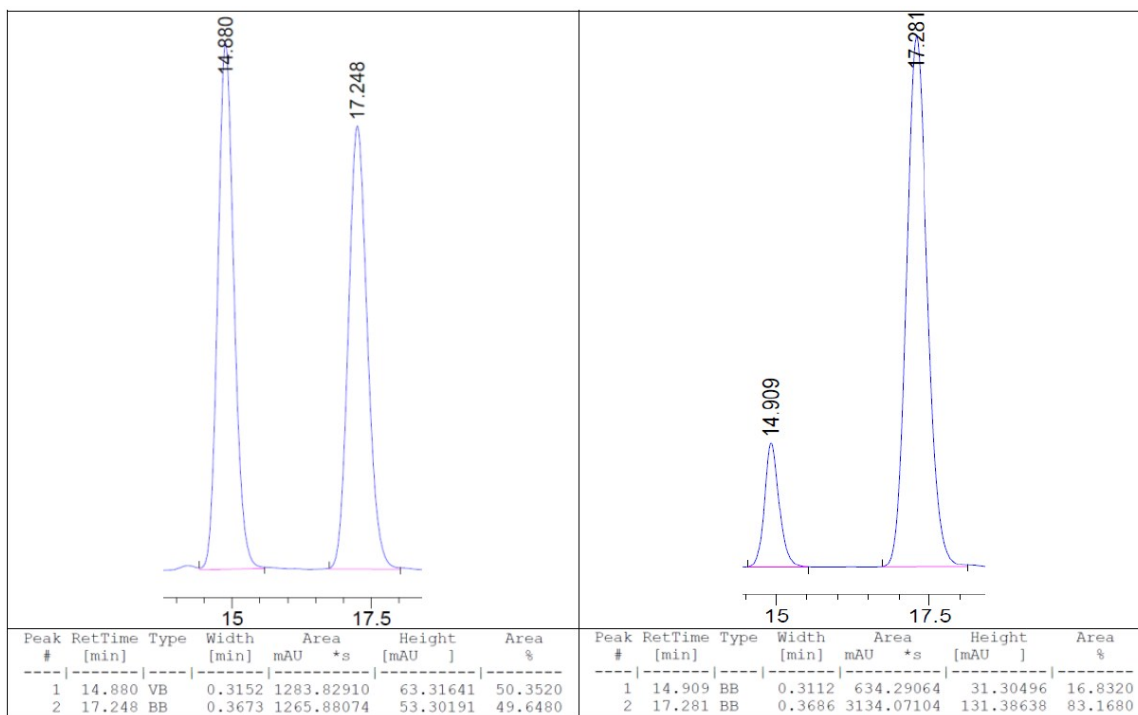

**(S)-isopropyl-3-nitro-2-phenyl-2, 5-dihydrothiophene-2-carboxylate (3c)**

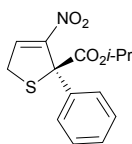

Pale yellow oil, yield: 67%, ee: 80%. <sup>1</sup>H NMR (400 MHz, CDCl<sub>3</sub>): δ 7.64 (d, *J* = 7.5 Hz, 2H), 7.39 (t, *J* = 2.8 Hz, 1H), 7.34 (t, *J* = 7.4 Hz, 2H), 7.29 (d, *J* = 7.1 Hz, 1H), 5.19-5.25 (m, 1H), 4.02-4.16 (m, 2H), 1.34 (d, *J* = 6.3 Hz, 3H), 1.29 (d, *J* = 6.2 Hz, 3H) ppm. <sup>13</sup>C NMR (100 MHz, CDCl<sub>3</sub>): δ 168.8, 153.7, 137.5, 128.6, 128.0, 127.8, 120.3, 70.3, 66.0, 33.1, 21.3 ppm. FTIR (KBr, cm<sup>-1</sup>): 3030, 2975, 2934, 2843, 1738, 1641, 1539, 1371, 1246, 1018, 819, 758, 698. HRMS (ESI): Calcd for C<sub>14</sub>H<sub>15</sub>NO<sub>4</sub>S [M+Na]<sup>+</sup>: 316.0619. Found: 316.0613. [α]<sub>D</sub><sup>16</sup> = +20.3 (C = 1.0, CHCl<sub>3</sub>). HPLC (Chiralpak AD-H column, *i*-PrOH/hexane = 10:90, 1.0 mL/min, 25 °C, 254 nm, t<sub>major</sub> = 9.074 min, t<sub>minor</sub> = 7.518 min)

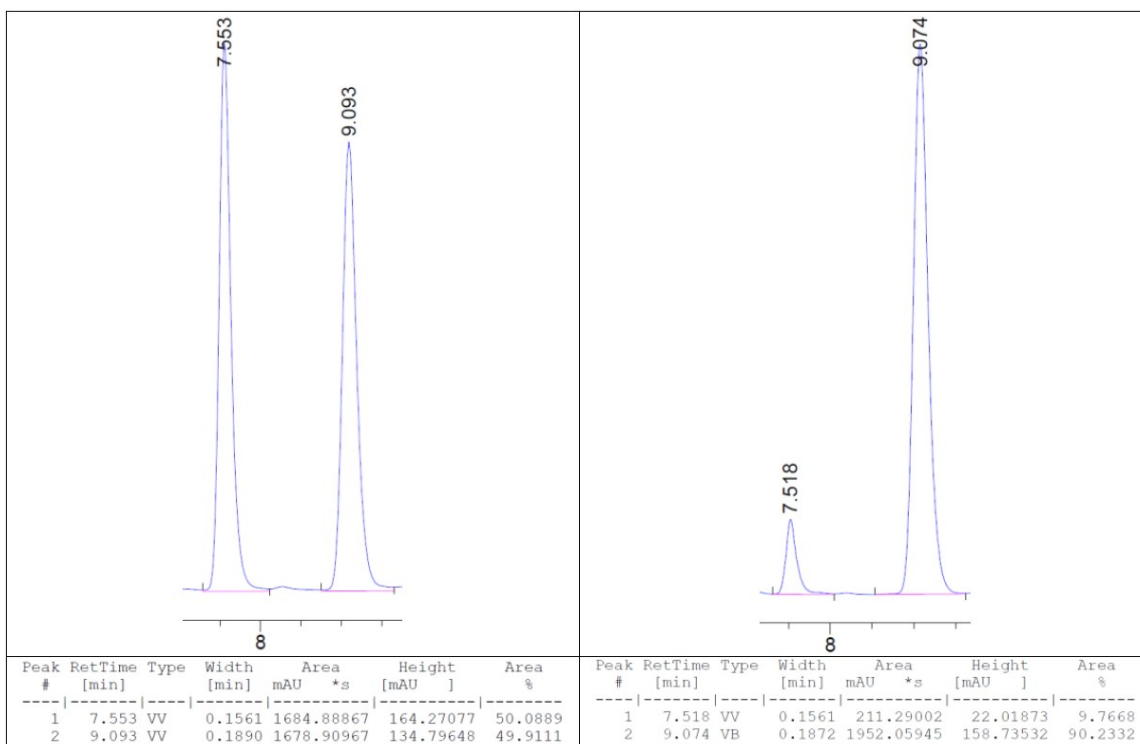

**(S)-tert-butyl-3-nitro-2-phenyl-2,5-dihydrothiophene-2-carboxylate (3d)**

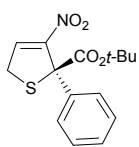

Pale yellow oil, yield: 73%, ee: 83%. <sup>1</sup>H NMR (400 MHz, CDCl<sub>3</sub>): δ 7.62 (d, *J* = 7.4 Hz, 2H), 7.31-7.36 (m, 3H), 7.27 (d, *J* = 7.2 Hz, 1H), 3.99-4.13 (m, 2H), 1.53 (s, 9H) ppm. <sup>13</sup>C NMR (100 MHz, CDCl<sub>3</sub>): δ 168.4, 154.1, 137.4, 128.5, 128.2, 127.8, 120.1, 83.4, 67.1, 33.6, 28.5 ppm. FTIR (KBr, cm<sup>-1</sup>): 3041, 2935, 2843, 1732, 1655, 1533, 1365, 1254, 1019, 816, 765, 694. HRMS (ESI): Calcd for C<sub>15</sub>H<sub>17</sub>NO<sub>4</sub>S [M+H]<sup>+</sup>: 308.0957. Found: 308.0951. [α]<sub>D</sub><sup>16</sup> = +28.9 (*C* = 1.0, CHCl<sub>3</sub>). HPLC (Chiralpak AD-H column, *i*-PrOH/hexane = 10:90, 1.0 mL/min, 25 °C, 254 nm, *t*<sub>major</sub> = 6.812 min, *t*<sub>minor</sub> = 5.812 min)

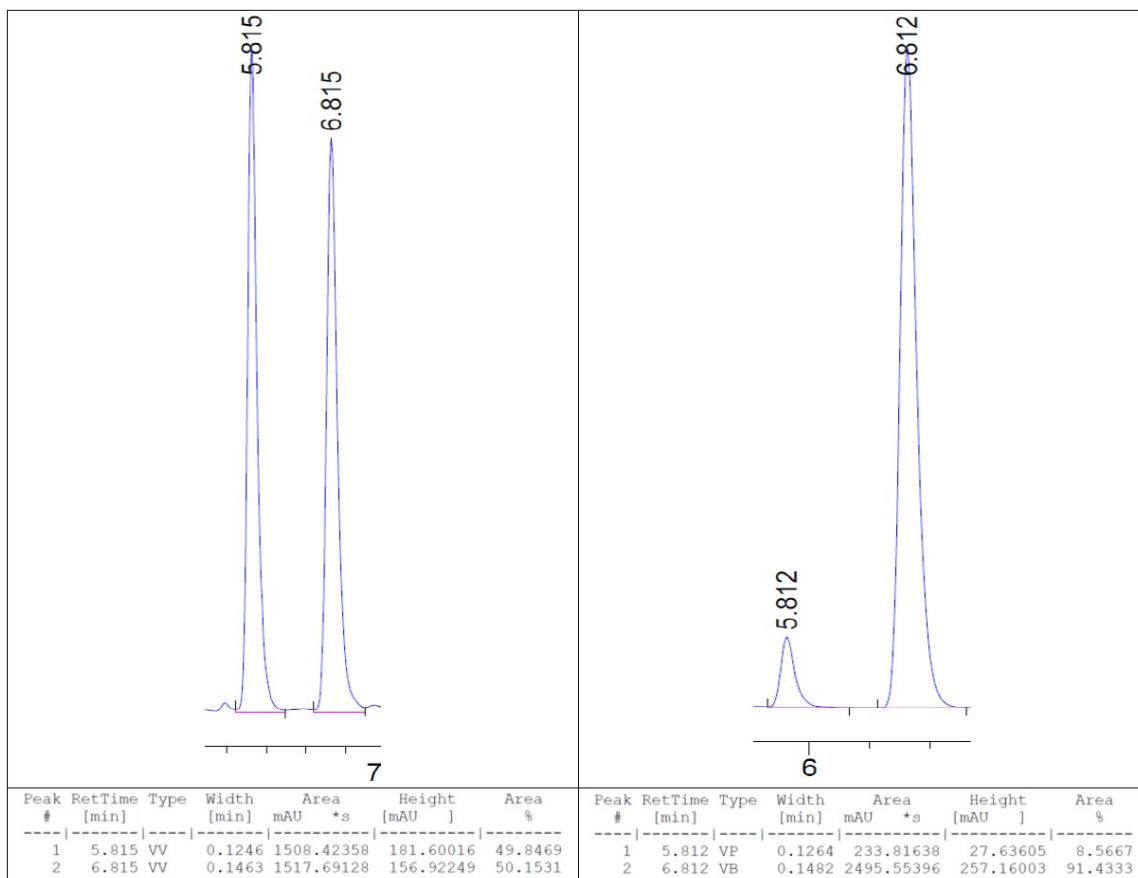

**(S)-tert-butyl-3-nitro-2-(p-tolyl)-2, 5-dihydrothiophene-2-carboxylate (3e)**

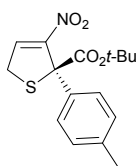

Pale yellow oil, yield: 65%, ee: 86%. <sup>1</sup>H NMR (400 MHz, CDCl<sub>3</sub>): δ 7.50 (d, *J* = 8.4 Hz, 2H), 7.35 (t, *J* = 2.4 Hz, 1H), 7.14 (d, *J* = 8.4 Hz, 2H), 3.98-4.13 (m, 2H), 2.32 (s, 3H), 1.52 (s, 9H) ppm. <sup>13</sup>C NMR (100 MHz, CDCl<sub>3</sub>): δ 168.3, 154.1, 137.8, 137.0, 135.3, 128.6, 128.5, 83.3, 66.6, 33.0, 27.7, 21.0 ppm. FTIR (KBr, cm<sup>-1</sup>): 3046, 2983, 2935, 2872, 1737, 1659, 1540, 1447, 1371, 1342, 1265, 1024, 831, 764, 689. HRMS (ESI): Calcd for C<sub>16</sub>H<sub>19</sub>NO<sub>4</sub>S [M+Na]<sup>+</sup>: 344.0932. Found: 344.0927. [α]<sub>D</sub><sup>20</sup> = +37.3 (C = 1.0, CHCl<sub>3</sub>). HPLC (Chiralpak AD-H column, *i*-PrOH/hexane = 10:90, 1.0 mL/min, 25 °C, 254 nm, *t*<sub>major</sub> = 8.746 min, *t*<sub>minor</sub> = 6.673 min)

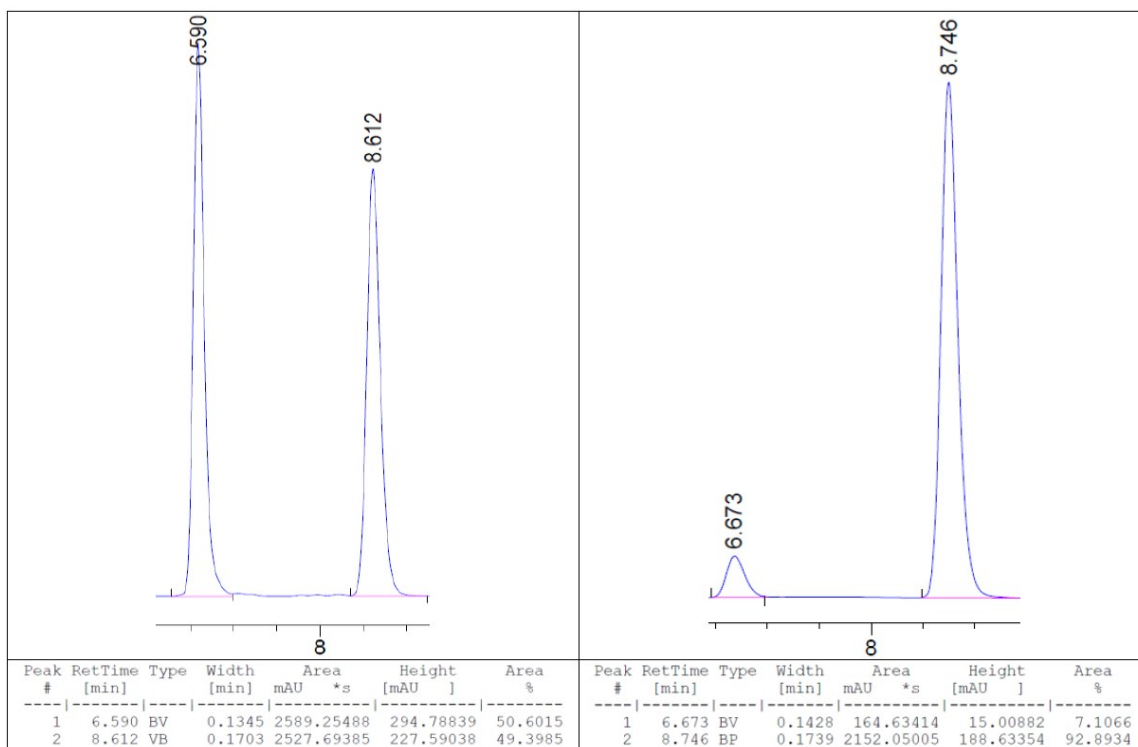

**(S)- tert-butyl-2-(4-methoxyphenyl)-3-nitro-2,5-dihydrothiophene-2-carboxylate (3f)**

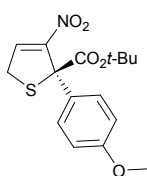

Pale yellow oil, yield: 71%, ee: 82%. <sup>1</sup>H NMR (400 MHz, CDCl<sub>3</sub>): δ 7.56 (d, *J* = 8.9 Hz, 2H), 7.32 (t, *J* = 2.9 Hz, 1H), 6.85 (d, *J* = 8.9 Hz, 2H), 3.79-4.07 (m, 2H), 3.72 (s, 3H), 1.52 (s, 9H) ppm. <sup>13</sup>C NMR (100 MHz, CDCl<sub>3</sub>): δ 168.4, 159.0, 154.2, 136.7, 130.1, 130.0, 113.1, 83.3, 66.4, 55.2, 32.9, 27.7 ppm. FTIR (KBr, cm<sup>-1</sup>): 3042, 2984, 2933, 2871, 1739, 1665, 1536, 1463, 1446, 1349, 1258, 1174, 1032, 828, 761, 693.

HRMS (ESI): Calcd for C<sub>16</sub>H<sub>19</sub>NO<sub>5</sub>S [M+Na]<sup>+</sup>: 360.0882. Found: 360.0871. [α]<sub>D</sub><sup>16</sup> = +13.2 (*C* = 1.0, CHCl<sub>3</sub>). HPLC (Chiralpak AD-H column, *i*-PrOH/hexane = 10:90, 1.0 mL/min, 25 °C, 254 nm, *t*<sub>major</sub> = 13.597 min, *t*<sub>minor</sub> = 9.744 min)



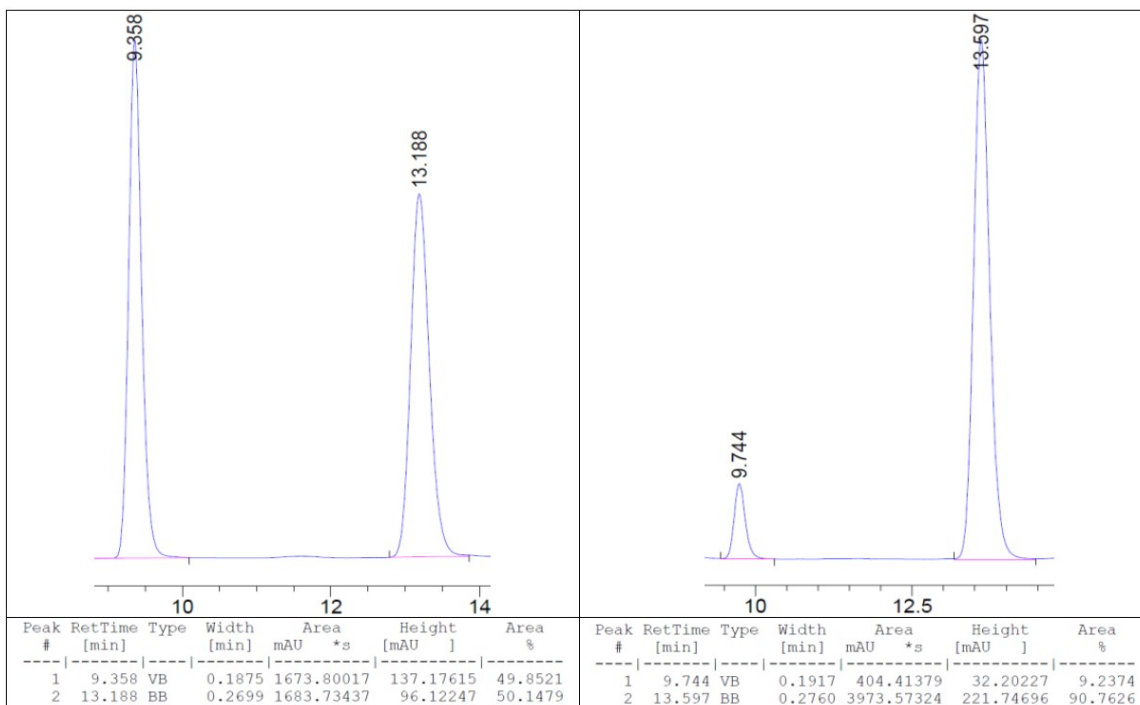

**(S)-tert-butyl-2-(4-fluorophenyl)-3-nitro-2, 5-dihydrothiophene-2-carboxylate (3g)**

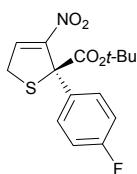

Pale yellow oil, yield: 68%, ee: 85%. <sup>1</sup>H NMR (600 MHz, CDCl<sub>3</sub>) δ 7.62-7.64 (m, 2H), 7.32 (s, 1H), 6.70 (t, *J* = 7.8 Hz, 2H), 3.96-4.08 (m, 2H), 1.51 (s, 9H) ppm. <sup>13</sup>C NMR (150 MHz, CDCl<sub>3</sub>) δ 168.0, 162.7, 161.1, 153.8, 137.4, 134.0, 130.7, 114.6, 83.5, 66.1, 32.9, 27.5 ppm. FTIR (KBr, cm<sup>-1</sup>): 3061, 2986, 2932, 1730, 1669, 1546, 1443, 1372, 1264, 1165, 1027, 832, 810, 692. HRMS (ESI): Calcd for C<sub>15</sub>H<sub>16</sub>FNO<sub>4</sub>S [M+Na]<sup>+</sup>: 348.0682. Found: 348.0684. [α]<sub>D</sub><sup>16</sup> = +31.3 (*C* = 1.0, CHCl<sub>3</sub>). HPLC (Chiralpak AD-H column, *i*-PrOH/hexane = 10:90, 1.0 mL/min, 25 °C, 254 nm, *t*<sub>major</sub> = 9.086 min, *t*<sub>minor</sub> = 7.340 min)

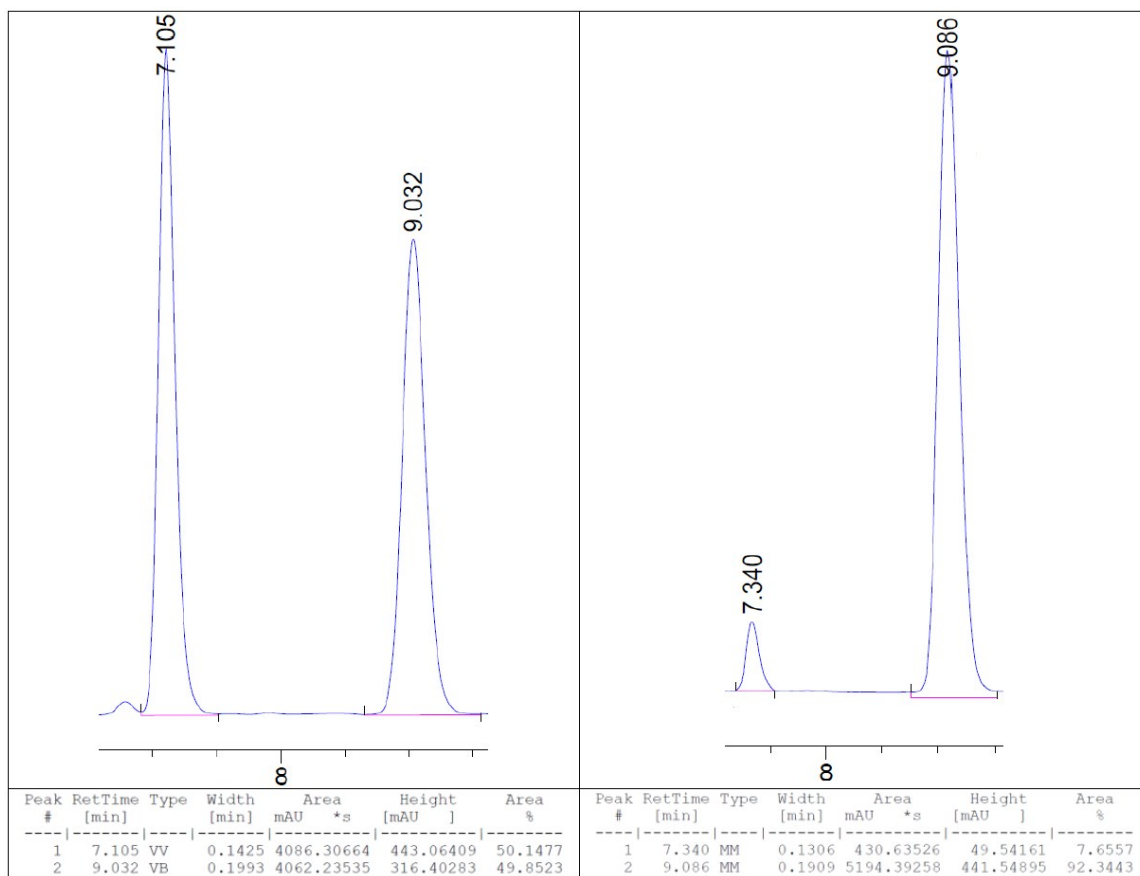

**(S)-tert-butyl-2-(4-chlorophenyl)-3-nitro-2, 5-dihydrothiophene-2-carboxylate (3h)**

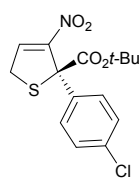

Pale yellow oil, yield: 75%, ee: 86%. <sup>1</sup>H NMR (600 MHz, CDCl<sub>3</sub>) δ 7.58 (d, *J* = 7.8 Hz, 2H), 7.37 (s, 1H), 7.30 (d, *J* = 8.2 Hz, 2H), 4.02-4.13 (m, 2H), 1.52 (s, 9H) ppm. <sup>13</sup>C NMR (150 MHz, CDCl<sub>3</sub>) δ 167.9, 154.0, 137.4, 137.2, 136.8, 134.0, 130.3, 128.0, 83.8, 33.2, 27.7 ppm. FTIR (KBr, cm<sup>-1</sup>): 3058, 2983, 2937, 1735, 1662, 1541, 1439, 1368, 1260, 1161, 1028, 828, 752, 692. HRMS (ESI): Calcd for C<sub>15</sub>H<sub>16</sub>ClNO<sub>4</sub>S [M+Na]<sup>+</sup>: 364.0386. Found: 364.0377. [α]<sub>D</sub><sup>16</sup> = +78.2 (*C* = 1.0, CHCl<sub>3</sub>). HPLC (Chiralpak AD-H column, *i*-PrOH/hexane = 10:90, 1.0 mL/min, 25 °C, 254 nm, *t*<sub>major</sub> = 9.966 min, *t*<sub>minor</sub> = 7.621 min)

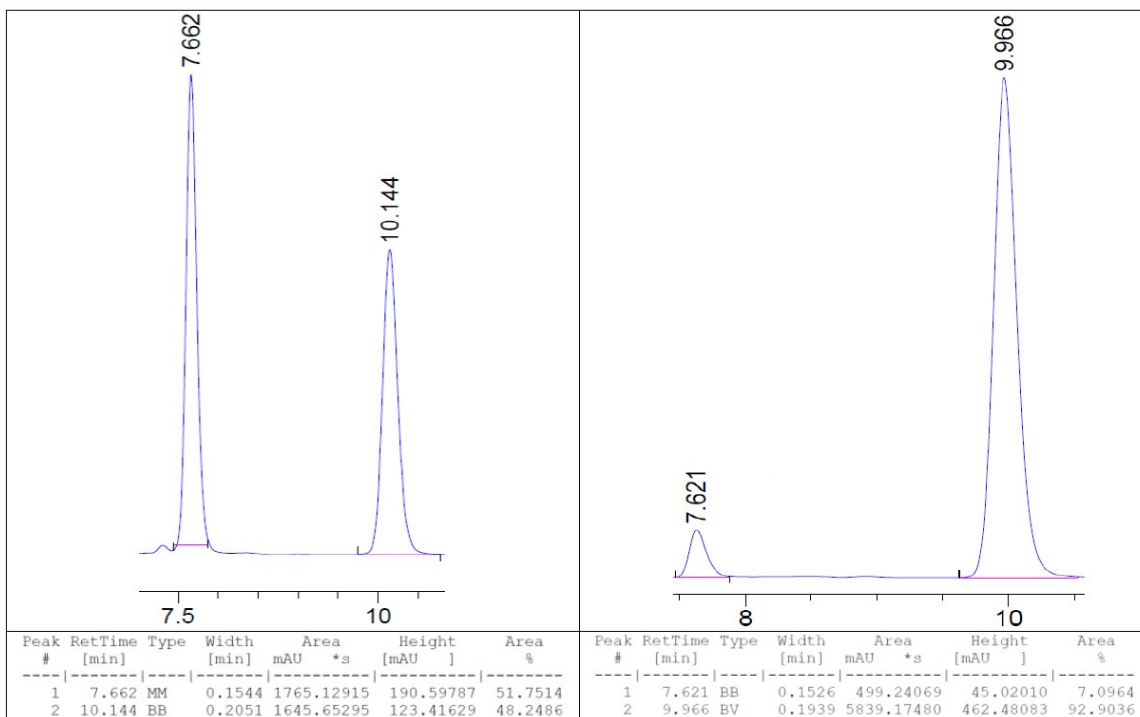

**(S)-tert-butyl-2-(3-methoxy phenyl)-3-nitro-2,5-dihydrothiophene-2-carboxylate (3i)**

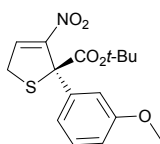

Pale yellow oil, yield: 71%, ee: 84%. <sup>1</sup>H NMR (600 MHz, CDCl<sub>3</sub>) δ 7.33 (s, 1H), 7.22-7.25 (m, 2H), 7.18 (d, *J* = 6.6 Hz, 1H), 6.80 (d, *J* = 7.8 Hz, 1H), 3.96-4.07 (m, 2H), 3.78 (s, 3H), 1.52 (s, 9H) ppm. <sup>13</sup>C NMR (150 MHz, CDCl<sub>3</sub>) δ 168.0, 159.0, 153.9, 139.9, 137.3, 128.8, 120.8, 115.1, 112.8, 83.4, 66.5, 55.2, 33.0, 27.6 ppm. FTIR (KBr, cm<sup>-1</sup>): 3049, 2980, 2839, 1734, 1667, 1530, 1432, 1364, 1260, 1164, 1024, 798, 706, 664. HRMS (ESI): Calcd for C<sub>16</sub>H<sub>19</sub>NO<sub>5</sub>S [M+Na]<sup>+</sup>: 360.0882. Found: 360.0871. [α]<sub>D</sub><sup>25</sup> = +28.5 (*C* = 1.0, CHCl<sub>3</sub>). HPLC (Chiralpak AD-H column, *i*-PrOH/hexane = 10:90, 1.0 mL/min, 25 °C, 254 nm, *t*<sub>major</sub> = 9.547 min, *t*<sub>minor</sub> = 8.626 min)

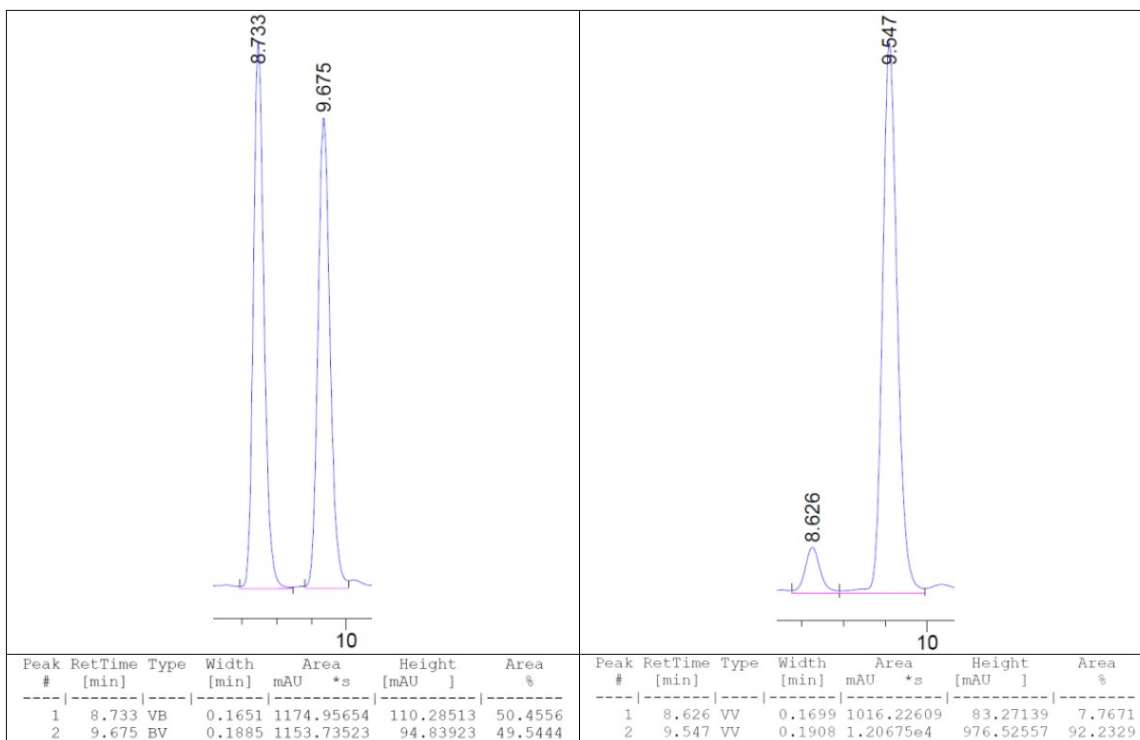

**(S)-tert-butyl-2-(3, 5-dimethylphenyl)-3-nitro-2, 5-dihydrothiophene-2-carboxylate (3j)**

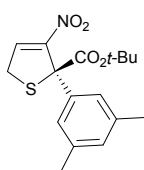

Pale yellow oil, yield: 67%, ee: 83%. <sup>1</sup>H NMR (600 MHz, CDCl<sub>3</sub>) δ 7.34 (s, 1H), 7.20 (s, 2H), 6.90 (s, 1H), 3.96-4.08 (m, 2H), 2.30 (s, 6H), 1.52 (s, 9H) ppm. <sup>13</sup>C NMR (150 MHz, CDCl<sub>3</sub>) δ 168.2, 154.1, 137.2, 131.0, 130.0, 129.5, 126.2, 83.1, 66.5, 33.0, 27.6, 21.4 ppm. FTIR (KBr, cm<sup>-1</sup>): 3041, 2986, 2949, 1733, 1658, 1537, 1431, 1364, 1259, 1172, 1023, 818, 755, 692. HRMS (ESI): Calcd for C<sub>17</sub>H<sub>21</sub>NO<sub>4</sub>S [M+Na]<sup>+</sup>: 358.1089. Found: 358.1083. [α]<sub>D</sub><sup>16</sup> = +44.9 (C = 1.0, CHCl<sub>3</sub>). HPLC (Chiralpak AD-H column, *i*-PrOH/hexane = 10:90, 1.0 mL/min, 25 °C, 254 nm, t<sub>major</sub> = 9.264 min, t<sub>minor</sub> = 7.922 min)

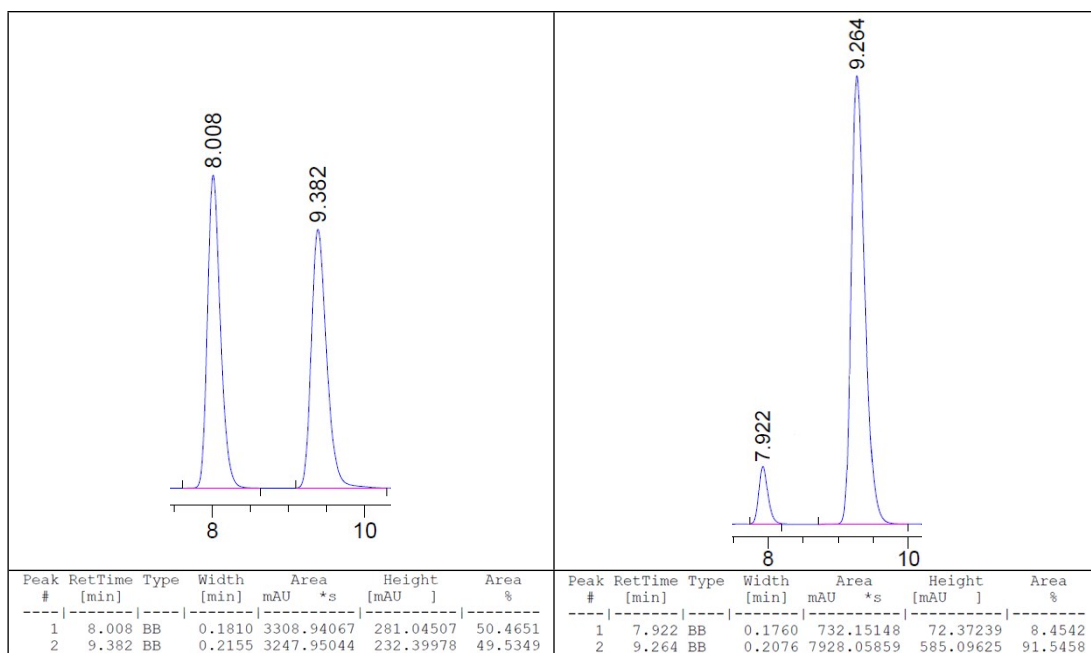

**(S)-tert-butyl-2-(naphthalen-2-yl)-3-nitro-2,5-dihydrothiophene-2-carboxylate (3k)**

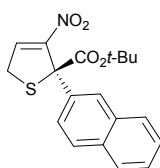

Pale yellow oil, yield: 72%, ee: 86%. <sup>1</sup>H NMR (600 MHz, CDCl<sub>3</sub>) δ 8.12 (s, 1H), 7.81 (d, *J* = 8.6 Hz, 3H), 7.69 (d, *J* = 8.5 Hz, 1H), 7.45-7.49 (m, 3H), 4.08-4.19 (m, 2H), 1.53 (s, 9H) ppm. <sup>13</sup>C NMR (150 MHz, CDCl<sub>3</sub>) δ 169.4, 153.6, 137.9, 134.9, 132.6, 128.5, 127.8, 127.7, 127.6, 127.4, 126.7, 126.3, 126.0, 82.8, 66.1, 33.2, 28.6 ppm. FTIR (KBr, cm<sup>-1</sup>): 3037, 2980, 2932, 1729, 1658, 1536, 1433, 1360, 1252, 1163, 1041, 775, 736. HRMS (ESI): Calcd for C<sub>19</sub>H<sub>19</sub>NO<sub>4</sub>S [M+Na]<sup>+</sup>: 380.0932. Found: 380.0927. [α]<sub>D</sub><sup>16</sup> = +78.2 (*C* = 1.0, CHCl<sub>3</sub>). HPLC (Chiralpak AD-H column, *i*-PrOH/hexane = 5:95, 0.8 mL/min, 25 °C, 254 nm, *t*<sub>major</sub> = 30.406 min, *t*<sub>minor</sub> = 18.523 min)

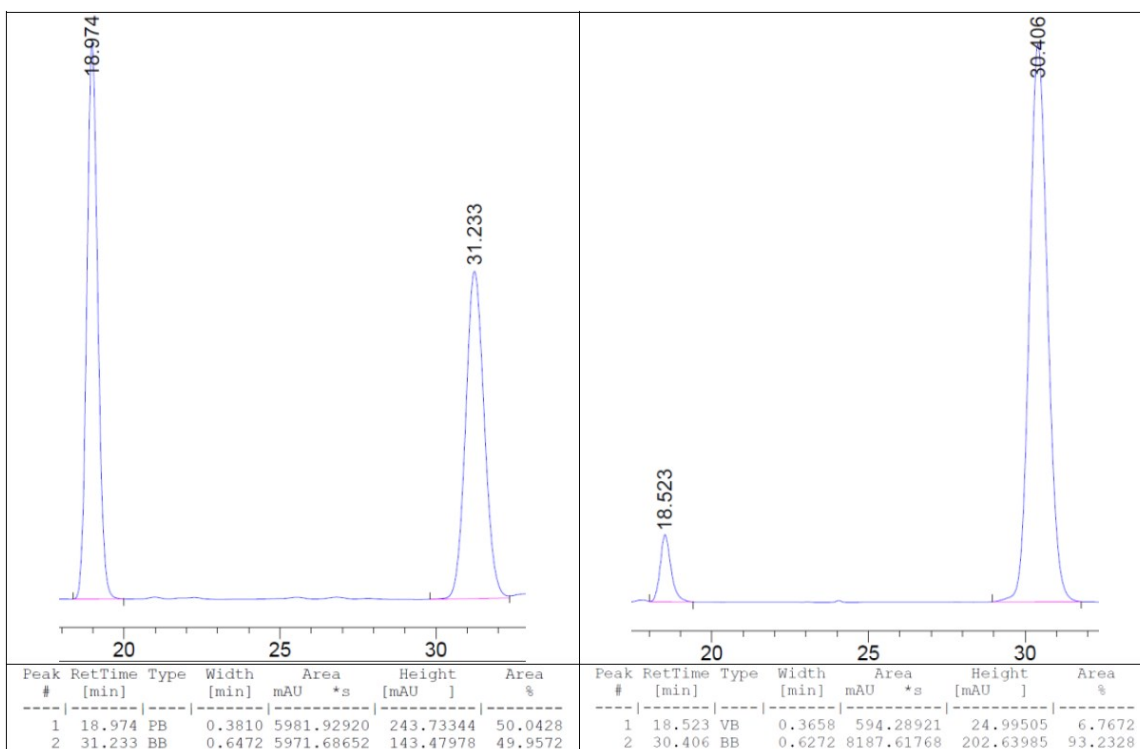

**(S)-tert-butyl-3-nitro-2, 5-dihydro-[2, 2'-bithiophene]-2-carboxylate (3I)**

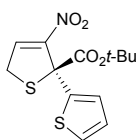

Pale yellow oil, yield: 62%, ee: 83%. <sup>1</sup>H NMR (600 MHz, CDCl<sub>3</sub>) δ 7.39 (d, *J* = 1.5 Hz, 1H), 7.30 (d, *J* = 4.8 Hz, 1H), 7.22-7.23 (m, 1H), 6.94-6.96 (m, 1H), 4.08 (dd, *J* = 51.5, 17.7 Hz, 2H), 1.53 (s, 9H) ppm. <sup>13</sup>C NMR (150 MHz, CDCl<sub>3</sub>) δ 168.7, 141.3, 137.8, 127.9, 127.7, 127.0, 126.8, 84.1, 62.8, 33.3, 27.6 ppm. FTIR (KBr, cm<sup>-1</sup>): 3028, 2982, 2937, 1734, 1541, 1443, 1368, 1259, 1156, 1034, 802. HRMS (ESI): Calcd for C<sub>13</sub>H<sub>15</sub>NO<sub>4</sub>S [M+Na]<sup>+</sup>: 336.0340. Found: 336.0331. [α]<sub>D</sub><sup>16</sup> = +38.2 (*C* = 1.0, CHCl<sub>3</sub>). HPLC (Chiralpak AD-H column, *i*-PrOH/hexane = 5:95, 0.8 mL/min, 25 °C, 254 nm, *t*<sub>major</sub> = 16.432 min, *t*<sub>minor</sub> = 21.607 min)

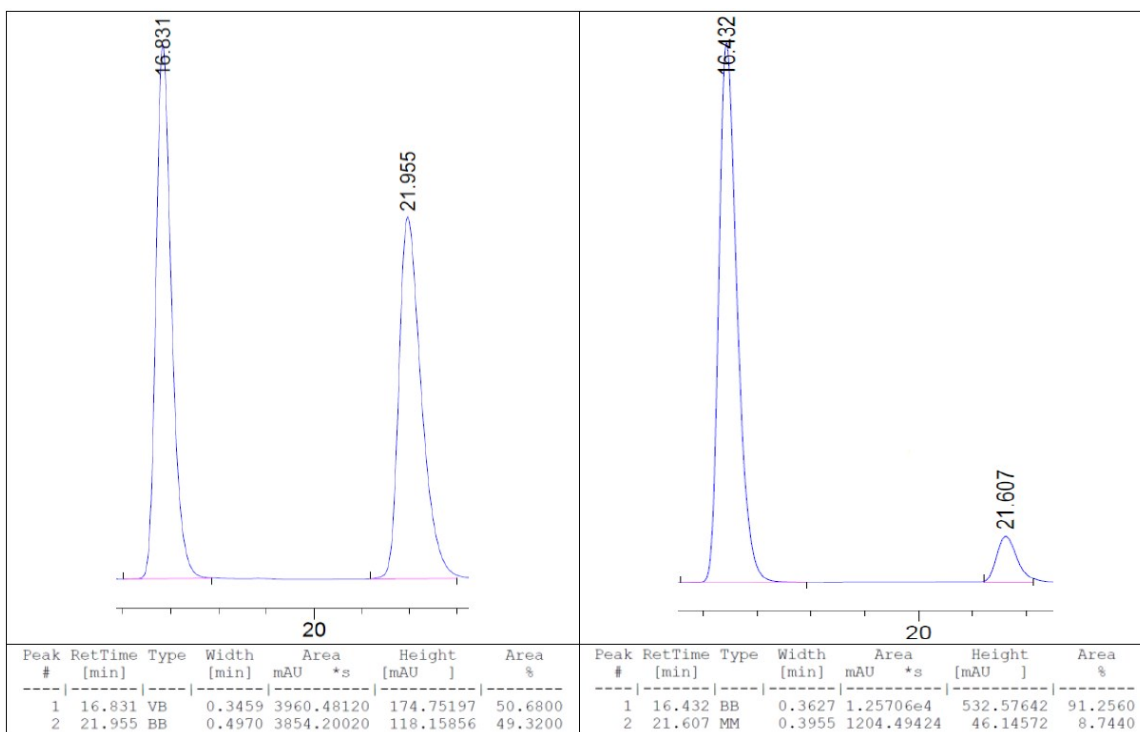

**(S)-tert-butyl-2-isopropyl-3-nitro-2, 5-dihydrothiophene-2-carboxylate (3m)**

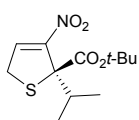

Pale yellow oil, yield: 69%, ee: 85%. <sup>1</sup>H NMR (400 MHz, CDCl<sub>3</sub>) δ 7.19 (d, *J* = 7.2 Hz, 1H), 3.87-4.01 (m, 2H), 2.19-2.26 (m, 1H), 1.51 (s, 9H), 1.04 (dd, *J* = 7.0, 1.4 Hz, 6H) ppm. <sup>13</sup>C NMR (100 MHz, CDCl<sub>3</sub>) δ 164.6, 154.3, 123.9, 84.8, 70.5, 33.2, 27.7, 27.0, 16.8 ppm. FTIR (KBr, cm<sup>-1</sup>): 3061, 2978, 2873, 1740, 1684, 1539, 1432, 1371, 1258, 1107, 1024, 778. HRMS (ESI): Calcd for C<sub>12</sub>H<sub>19</sub>NO<sub>4</sub>S [M+Na]<sup>+</sup>: 296.0933. Found: 296.0927. [α]<sub>D</sub><sup>25</sup> = +28.9 (*C* = 1.0, CHCl<sub>3</sub>). HPLC (Chiralpak AD-H column, *i*-PrOH/hexane = 10:90, 1.0 mL/min, 25 °C, 254 nm, *t*<sub>major</sub> = 9.327 min, *t*<sub>minor</sub> = 8.310 min)

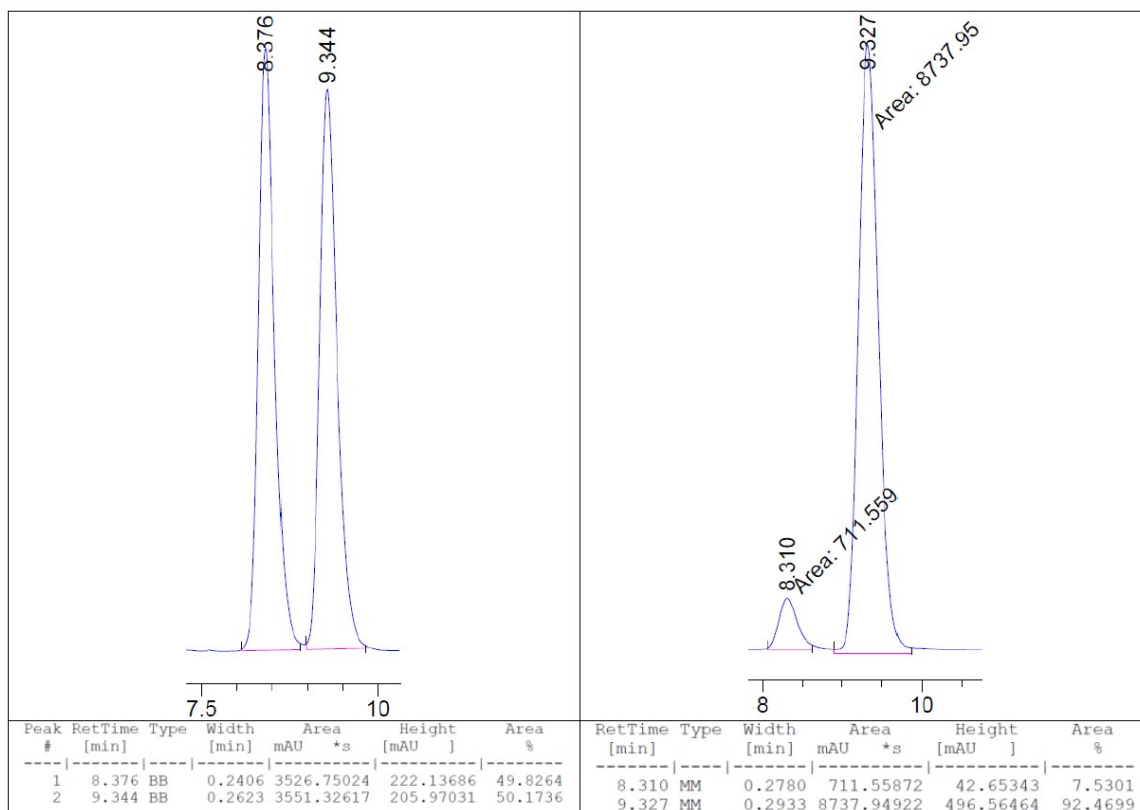

**(S)-2-tert-butyl-4-ethyl 3-nitro-2-phenyl-2,5-dihydrothiophene-2,4-dicarboxylate (3n)**

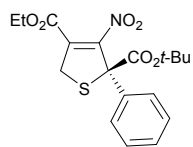

Pale yellow oil, yield: 65%, ee: 87%. <sup>1</sup>H NMR (600 MHz, CDCl<sub>3</sub>) δ 7.62 (d, *J* = 7.8 Hz, 2H), 7.36 (t, *J* = 7.2 Hz, 2H), 7.31 (d, *J* = 6.6 Hz, 1H), 4.33 (dd, *J* = 14.1, 7.0 Hz, 2H), 4.13 (dd, *J* = 11.2 Hz, 2H), 1.54 (s, 9H), 1.32 (t, *J* = 7.1 Hz, 3H) ppm. <sup>13</sup>C NMR (150 MHz, CDCl<sub>3</sub>) δ 167.6, 161.8, 151.1, 136.9, 128.5, 128.4, 128.3, 128.1, 84.1, 68.9, 62.8, 34.5, 27.8, 13.7 ppm. FTIR (KBr, cm<sup>-1</sup>): 2983, 2939, 2877, 1738, 1694, 1532, 1447, 1362, 1249, 1036, 818, 760, 697. HRMS (ESI): Calcd for C<sub>18</sub>H<sub>21</sub>NO<sub>6</sub>S [M+Na]<sup>+</sup>: 402.0987. Found: 402.0982. [α]<sub>D</sub><sup>16</sup> = +20.6 (*C* = 1.0, CHCl<sub>3</sub>). HPLC (Chiralpak AD-H column, *i*-PrOH/hexane = 5:95, 1.0 mL/min, 25 °C, 254 nm, *t*<sub>major</sub> = 10.617 min, *t*<sub>minor</sub> = 14.848 min)



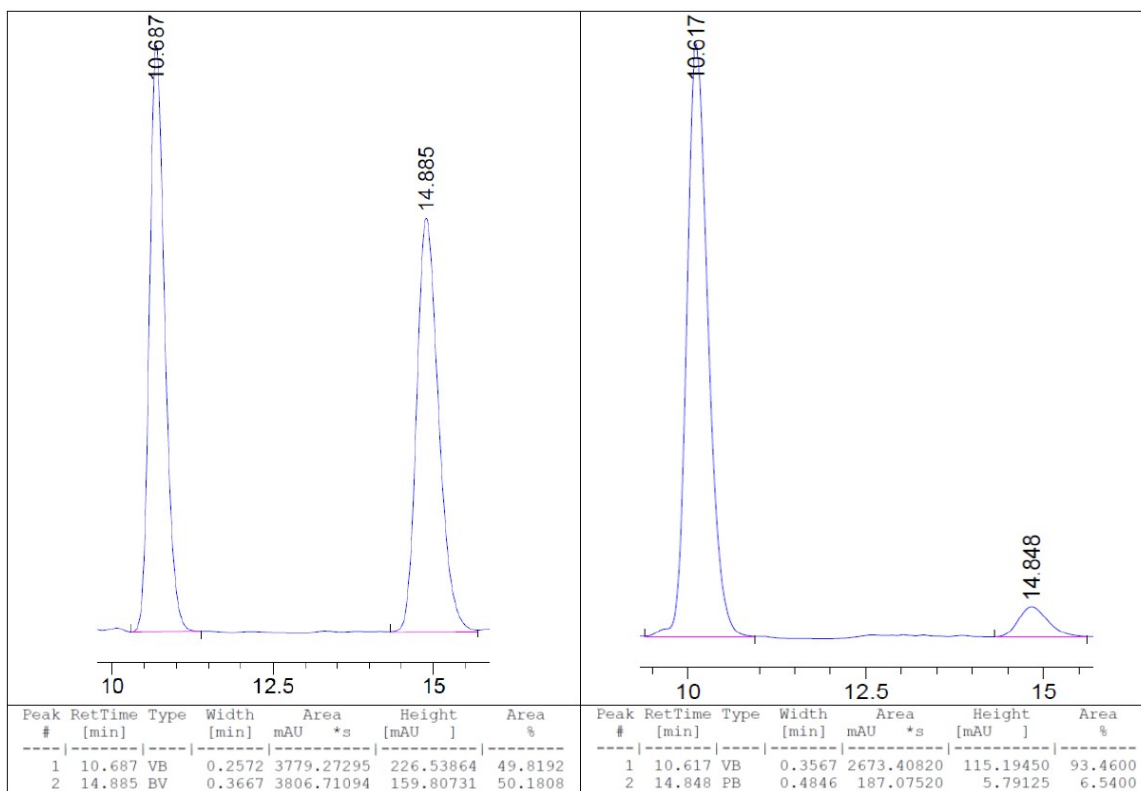

**(S)-2-tert-butyl-4-ethyl-2-(3,5-dimethylphenyl)-3-nitro-2,5-dihydrothiophene-2,4-dicarboxylate (3o)**

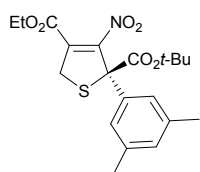

Pale yellow oil, yield: 64%, ee: 88%. <sup>1</sup>H NMR (600 MHz, CDCl<sub>3</sub>) δ 7.19 (s, 2H), 6.93 (s, 1H), 4.18 (dd, *J* = 14.0, 7.0 Hz, 2H), 4.13-4.22 (m, 2H), 2.31 (s, 6H), 1.53 (s, 9H), 1.32 (t, *J* = 7.1 Hz, 3H) ppm. <sup>13</sup>C NMR (150 MHz, CDCl<sub>3</sub>) δ 167.6, 161.8, 151.3, 137.6, 136.6, 130.1, 126.1, 125.9, 83.8, 68.7, 62.7, 34.3, 27.6, 21.4, 13.6 ppm. FTIR (KBr, cm<sup>-1</sup>): 2987, 2941, 2829, 1729, 1685, 1531, 1452, 1351, 1263, 1102, 1015, 820, 756, 693. HRMS (ESI): Calcd for C<sub>20</sub>H<sub>25</sub>NO<sub>6</sub>S [M+Na]<sup>+</sup>: 430.1300. Found: 430.1296. [α]<sub>D</sub><sup>20</sup> = +26.1 (*C* = 1.0, CHCl<sub>3</sub>). HPLC (Chiralpak AD-H column, *i*-PrOH/hexane = 5:95, 1.0 mL/min, 25 °C, 254 nm, *t*<sub>major</sub> = 11.911 min, *t*<sub>minor</sub> = 14.575 min)

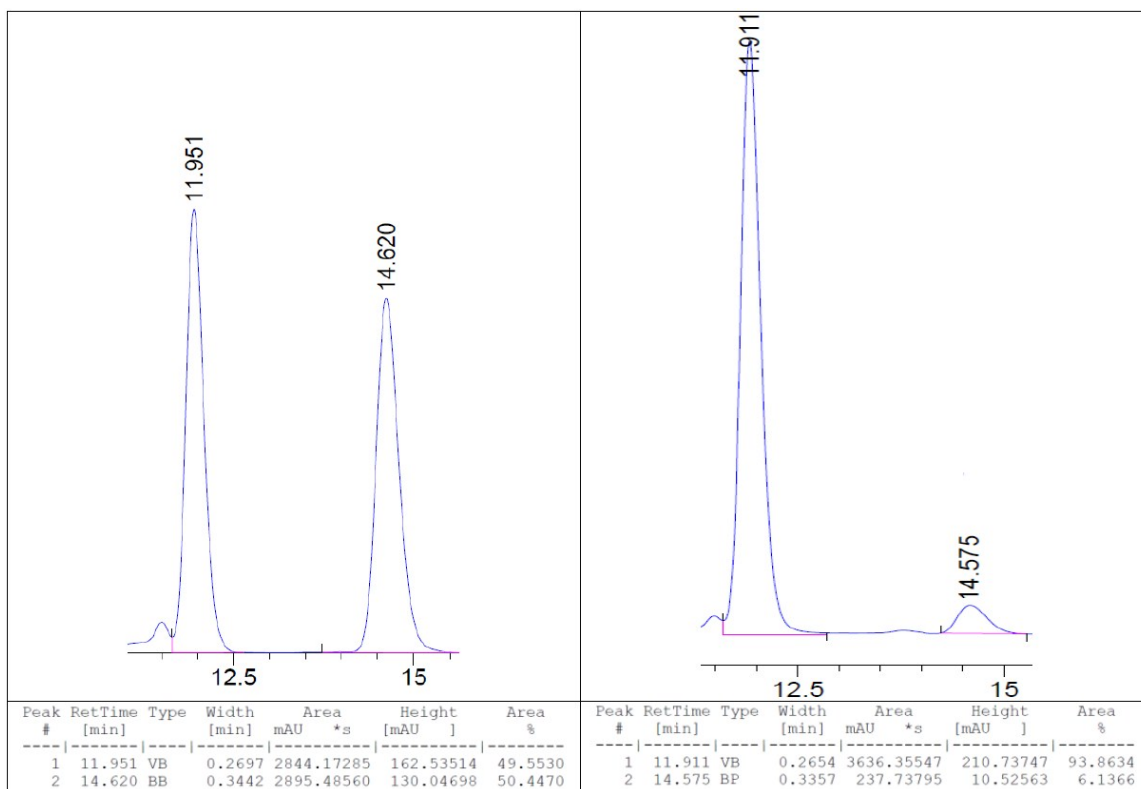

**(2*S*,3*S*,4*S*)-tert-butyl-4-(1*H*-benzo[d][1,2,3]triazol-1-yl)-3-nitro-2-phenyltetrahydrothiophene-2-carboxylate (4)**

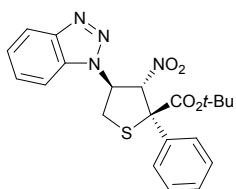

White solid, mp 119-121 °C, yield: 58%, dr: > 19:1, ee: 85%. <sup>1</sup>H NMR (600 MHz, CDCl<sub>3</sub>) δ 8.10 (d, *J* = 8.4 Hz, 1H), 7.78 (d, *J* = 7.4 Hz, 2H), 7.70 (d, *J* = 8.4 Hz, 1H), 7.58 (t, *J* = 7.6 Hz, 1H), 7.41-7.44 (m, 3H), 7.38 (t, *J* = 7.3 Hz, 1H), 6.51 (dd, *J* = 14.8, 8.2 Hz, 1H), 6.10 (d, *J* = 8.1 Hz, 1H), 3.77 (dd, *J* = 11.7, 8.7 Hz, 1H), 3.61 (dd, *J* = 11.8, 6.4 Hz, 1H), 1.56 (s, 9H) ppm. <sup>13</sup>C NMR (150 MHz, CDCl<sub>3</sub>) δ 168.7, 145.9, 136.2, 132.8, 128.4, 128.3, 128.1, 124.5, 120.2, 109.3, 95.2, 84.5, 64.6, 63.0, 33.0, 27.6 ppm. FTIR (KBr, cm<sup>-1</sup>): 2938, 2904, 1726, 1678, 1596, 1531, 1489, 1362, 1216, 1152, 1045, 814, 747, 695. HRMS (ESI): Calcd for C<sub>21</sub>H<sub>21</sub>N<sub>4</sub>O<sub>4</sub>S [M+H]<sup>+</sup>: 427.1440. Found: 427.1445. [α]<sub>16</sub> D = +33.8 (*C* = 1.0, CHCl<sub>3</sub>). HPLC (Chiralpak AD-H column, *i*-PrOH/hexane = 10:90, 1.0 mL/min, 25 °C, 254 nm, *t*<sub>major</sub> = 9.991 min, *t*<sub>minor</sub> = 24.902 min)

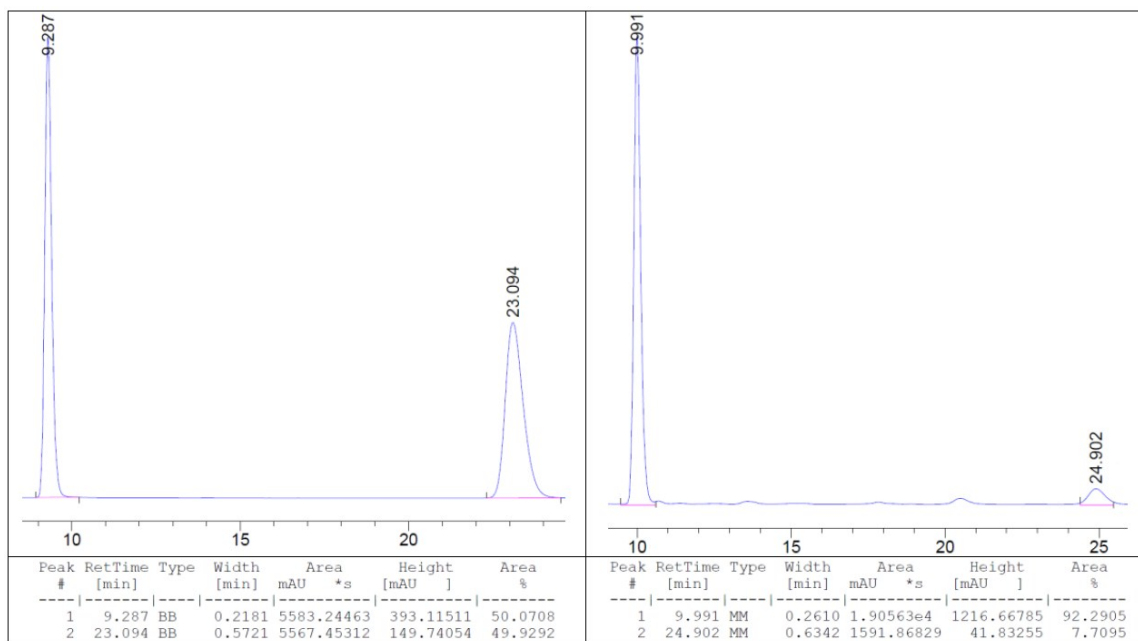

### Procedure for a larger scale experiment

To a stirred solution of  $\beta$ -nitroacrylates **2a** (2 mmol, 442.4 mg), catalyst **VII** (0.2 mmol, 104.5 mg), 5Å MS (45 mg/mL, 607.5 mg) in distilled chloroform (13.5 mL), the substrate **1a** (1.2 mmol, 182.7 mg) was added at room temperature. After completed (monitored by TLC analysis), the mixture was cooled to 0 °C, then TFAA (4 mmol, 0.56 mL) was added and Et<sub>3</sub>N (4 mmol, 0.56 mL) was dropped slowly. The reaction mixture was kept stirring until completed (monitored by TLC analysis), the crude product was washed with H<sub>2</sub>O (10 mL  $\times$  3), dried with MgSO<sub>4</sub>, then purified by column chromatography on silica gel (PE/EA = 20/1~10/1 as eluant) to afford the corresponding product **3a** in 67% yield. The enantioselectivity was 76%, determined by chiral HPLC analysis.

### 5. X-Ray Structure of **3a**

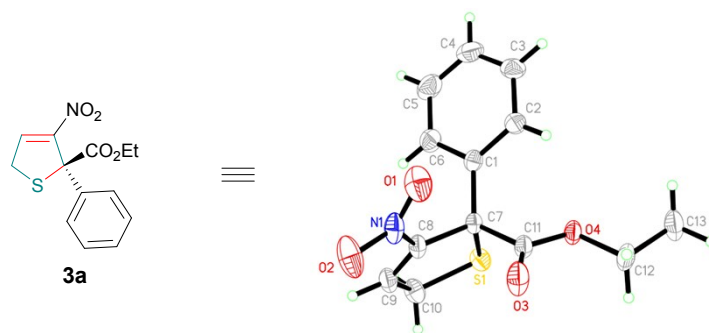

### 6. DFT calculation

#### 6.1 Computational methods

Spin-unrestricted density functional theory (DFT) calculations were performed using the Gaussian09 program package.<sup>2</sup> All structures were optimized without symmetry constrains at the B3LYP<sup>3</sup> level with the standard 6-31G (d, p) basis sets<sup>4</sup> for all atoms. The nature of all inter mediates was confirmed by performing normal-mode analysis, and the transition states (TSs) of reactions were confirmed by vibrational analysis and characterized by occurrence of only one imaginary frequency. All aromatic groups are replaced by methyl to save the calculation time.

The adsorption energy ( $E_{ads}$ ) was calculated as follows:

$$E_{ads} = E_{total} - E_{cat} - E_{IS1} - E_{IS2}$$

Where  $E_{total}$  is the calculated total energy of the adsorption system,  $E_{cat}$  is the energy of the catalyst,  $E_{IS1}$  and  $E_{IS2}$  are the energy of the reaction species.

## 6.2 Energy profile and calculated structures for the reaction pathway

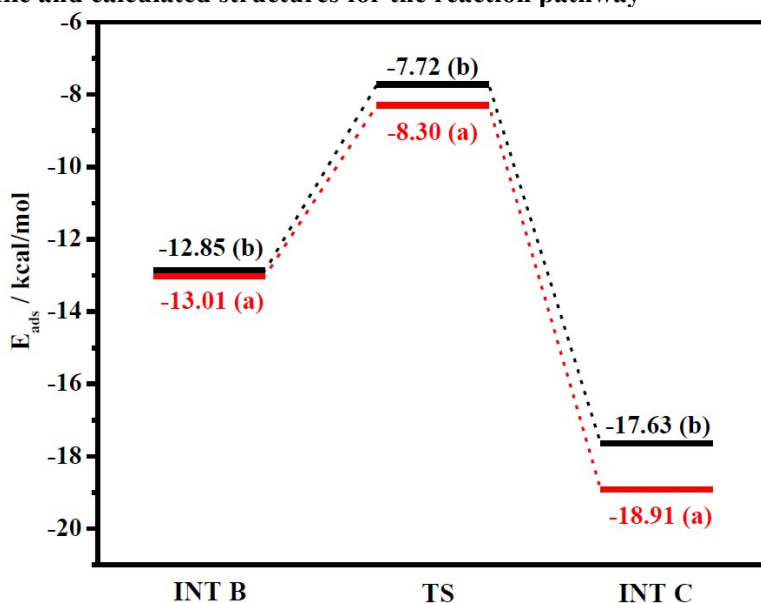

Fig S-1. The Gibbs free Energy profile of the reaction from INT B to INT

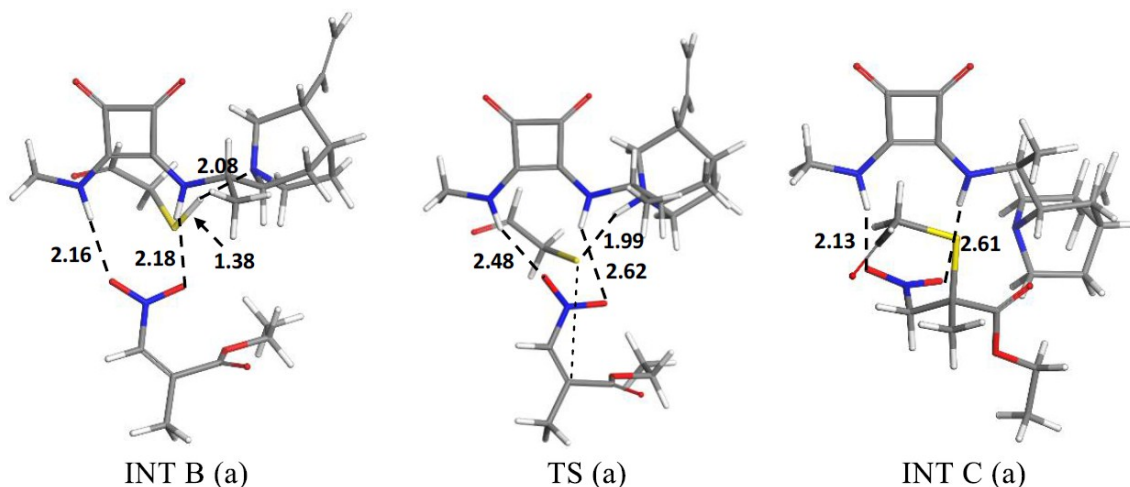

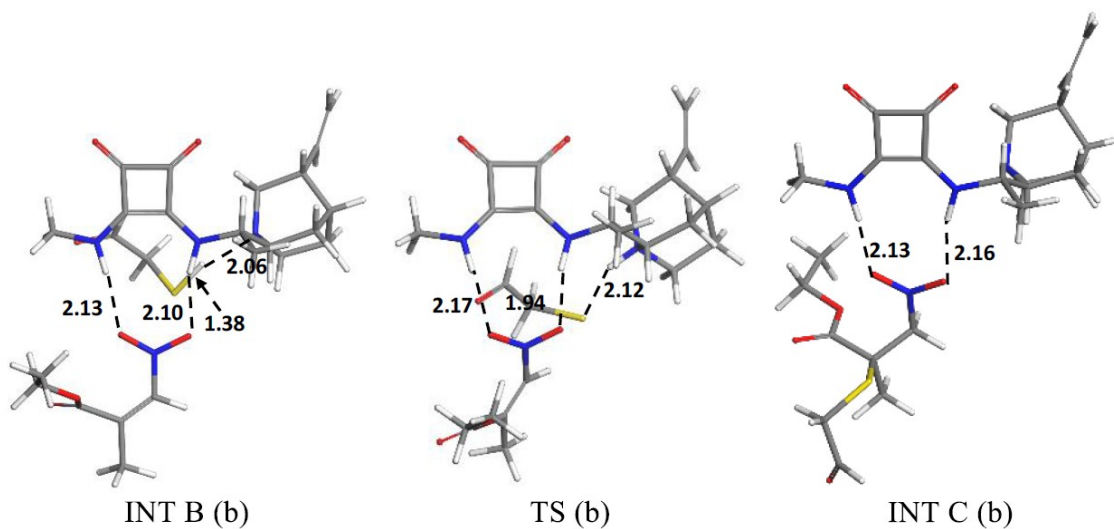

Fig S-2. Optimized structures on the reaction pathway, distances are in angstrom

The Gibbs free Energy of the transition state is -8.30 kcal/mol for (a) and -7.72 kcal/mol for (b). This result predicts that (a) is the main reaction pathway, which is in agreement with the experimental results.

### 6.3 Energy profile and calculated structures for the compound 4

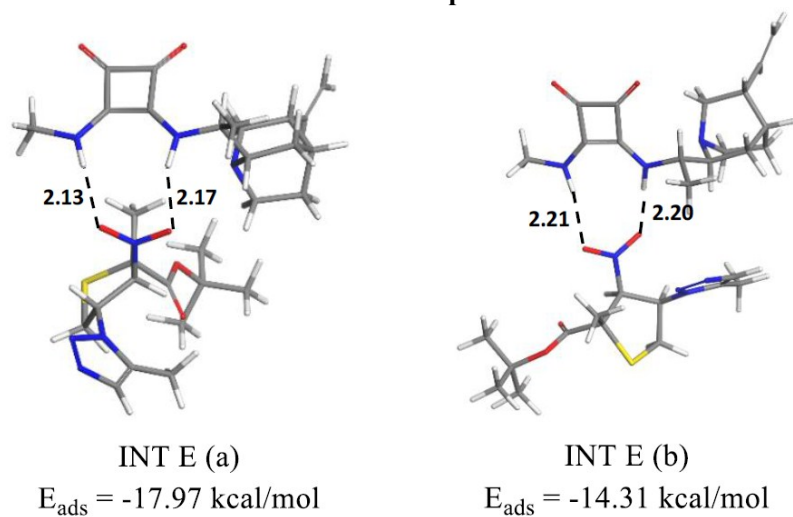

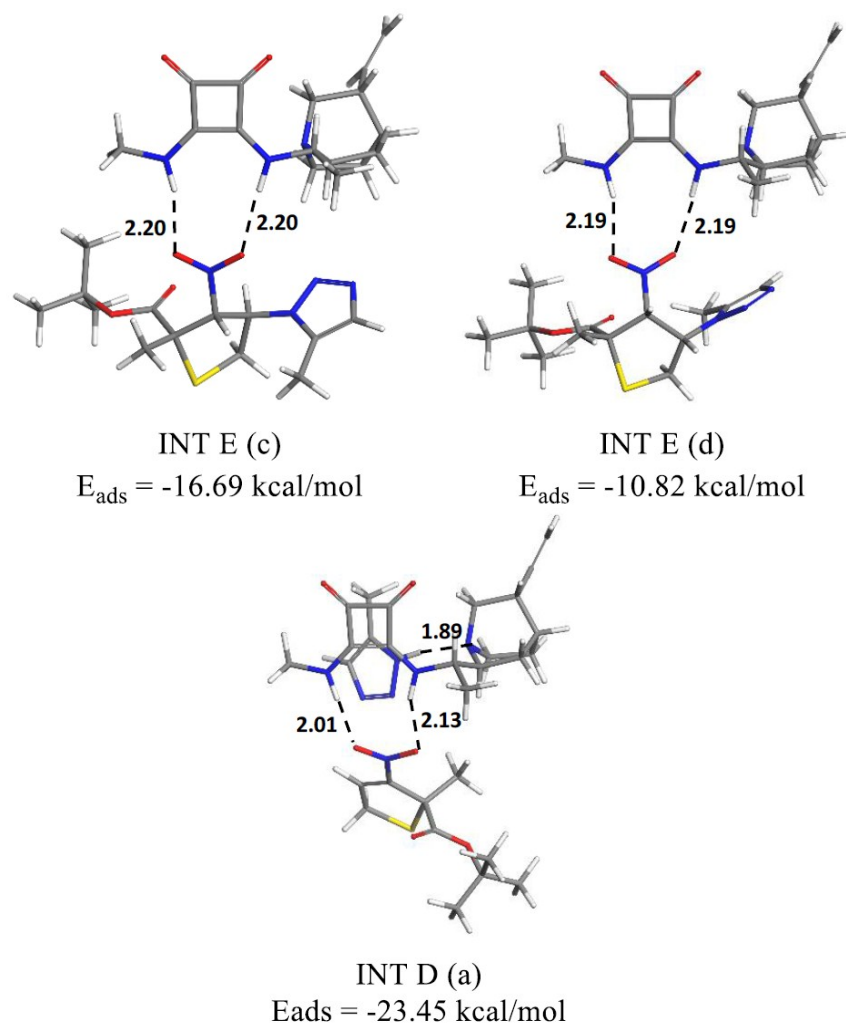

Fig S-3. The Gibbs free Energy profile of optimized structures, distances are in angstrom

As in Fig S-3, the lowest Gibbs free Energy of the optimized structures of compound **4** is -17.97 kcal/mol for (a) and the energy of corresponding adsorption state is -23.45 kcal/mol. This result shows that this reaction is endothermic, based on the Brønsted–Evans–Polanyi (BEP) relationship, the less heat it absorbs, the lower the Gibbs free Energy of the transition state is. Thus, we deduce that the configurations of the compound **4** are (3*S*, 4*S*), which is in agreement with INT E (a).

#### References

- (a) X. Creary. *J. Org. Chem.*, 1987, **52**, 5026. (b) C. Christensen., K. Juhl., R. G. Hazell and K. A. Jørgensen., *J. Org. Chem.*, 2002, **67**, 4875. (c) H. Li., L. Wang., L. Tang and L. Deng., *J. Am. Chem. Soc.*, 2004, **126**, 9906. (d) N. J. A. Martin., X. Cheng and B. List., *J. Am. Chem. Soc.*, 2008, **130**, 13862. (e) H.-H. Lu., F.-G. Zhang., S.-W. Duan and W.-J. Xiao., *Org. Lett.* 2009, **11**, 3946.
- Gaussian 09, Revision E.01, Frisch, M. J. et al., Gaussian, Inc., Wallingford CT, 2013.
- (a) A. D. Becke. *J. Chem. Phys.* **1993**, *98*, 5648. (b) C. Lee, W. Yang, R. G. Parr. *Phys. Rev. B* **1988**, *37*, 785.
- W. J. Hehre, L. Radom, P. v. R. Schleyer, J. A. Pople. *Ab Initio Molecular Orbital Theory*; John Wiley & Sons, Inc.: New York, 1986.

**Energies, thermal Free Energies, Z.P.E., negative eigenvalues (for TS structure) and Cartesian coordinates of all structures**

INT B (a)

Zero-point correction=0.592054

Sum of electronic and zero-point Energies=-2079.277126

Sum of electronic and thermal Free Energies=-2079.359816

0 1

|   |             |             |             |
|---|-------------|-------------|-------------|
| O | -3.04360000 | 4.75270000  | -0.69620000 |
| O | -3.79120000 | 1.62930000  | -1.62410000 |
| N | 0.07200000  | 3.86390000  | -0.33170000 |
| N | -0.66670000 | 0.80740000  | -1.33550000 |
| C | -1.05000000 | 3.24330000  | -0.71750000 |
| C | -1.36360000 | 1.94160000  | -1.14980000 |
| C | -2.45970000 | 3.69740000  | -0.86580000 |
| C | -2.79760000 | 2.26970000  | -1.30580000 |
| H | 0.92700000  | 3.32410000  | -0.27800000 |
| H | 0.33270000  | 0.79680000  | -1.16070000 |
| C | 0.06730000  | 5.21130000  | 0.23470000  |
| H | 0.18270000  | 5.17970000  | 1.32400000  |
| H | 0.88020000  | 5.80210000  | -0.19880000 |
| H | -0.88600000 | 5.68420000  | -0.00450000 |
| C | -3.88870000 | -2.38110000 | -0.14240000 |
| C | -2.85190000 | -3.45560000 | -0.57660000 |
| H | -4.42680000 | -2.06200000 | -1.04340000 |
| C | -1.27480000 | -2.57300000 | 1.15360000  |
| C | -1.95960000 | -2.83370000 | -1.66740000 |
| H | -3.37720000 | -4.32960000 | -0.97510000 |
| H | -0.18450000 | -2.67720000 | 1.16920000  |
| H | -1.58600000 | -2.36180000 | 2.18210000  |
| H | -1.27300000 | -3.58500000 | -2.07370000 |
| H | -2.59110000 | -2.49900000 | -2.49900000 |
| N | -1.60980000 | -1.38420000 | 0.33920000  |
| C | -3.07110000 | -1.16000000 | 0.41350000  |
| H | -3.31670000 | -0.98360000 | 1.46670000  |
| H | -3.33180000 | -0.25110000 | -0.13220000 |
| C | -1.96120000 | -3.86070000 | 0.61160000  |
| H | -2.55010000 | -4.35230000 | 1.39220000  |
| H | -1.21550000 | -4.59120000 | 0.27690000  |
| C | -4.90760000 | -2.88560000 | 0.84220000  |
| C | -6.21860000 | -2.96640000 | 0.61190000  |
| H | -4.52870000 | -3.18950000 | 1.81950000  |
| H | -6.91010000 | -3.33170000 | 1.36540000  |
| H | -6.64990000 | -2.66240000 | -0.33890000 |
| C | 4.42040000  | -1.57530000 | -0.58740000 |
| O | 4.34530000  | -2.33570000 | -1.52540000 |
| C | 5.15470000  | -0.25700000 | -0.68440000 |
| C | 6.65080000  | -0.37920000 | -0.68220000 |
| H | 6.98830000  | -0.83040000 | 0.25790000  |
| H | 6.95810000  | -1.05070000 | -1.49130000 |
| H | 7.14260000  | 0.58690000  | -0.80910000 |
| C | 4.55690000  | 0.93300000  | -0.81950000 |
| H | 5.07900000  | 1.87560000  | -0.90720000 |

|   |             |             |             |
|---|-------------|-------------|-------------|
| N | 3.12420000  | 1.10850000  | -0.85450000 |
| O | 2.38670000  | 0.11720000  | -0.89670000 |
| O | 2.72250000  | 2.27560000  | -0.85820000 |
| C | -0.67870000 | 2.64410000  | 2.94740000  |
| O | -0.17760000 | 3.65900000  | 3.38280000  |
| H | -1.41880000 | 2.67090000  | 2.12120000  |
| C | -0.31850000 | 1.25900000  | 3.43510000  |
| H | -1.21130000 | 0.66690000  | 3.65410000  |
| H | 0.30420000  | 1.33770000  | 4.32780000  |
| S | 0.68250000  | 0.40580000  | 2.13460000  |
| H | -0.35180000 | -0.08660000 | 1.37450000  |
| C | -1.16630000 | -1.63030000 | -1.05690000 |
| H | -0.10370000 | -1.89740000 | -0.97780000 |
| C | -1.25270000 | -0.37920000 | -1.96380000 |
| H | -2.30440000 | -0.13790000 | -2.14270000 |
| C | -0.56070000 | -0.63910000 | -3.31250000 |
| H | -0.68100000 | 0.22730000  | -3.96810000 |
| H | 0.51210000  | -0.81220000 | -3.16790000 |
| H | -0.97710000 | -1.51130000 | -3.82360000 |
| O | 4.01340000  | -1.80800000 | 0.66050000  |
| C | 3.32930000  | -3.07410000 | 0.88750000  |
| H | 3.98530000  | -3.88480000 | 0.55740000  |
| H | 2.43300000  | -3.08920000 | 0.26050000  |
| C | 3.00130000  | -3.15210000 | 2.36410000  |
| H | 2.35260000  | -2.32420000 | 2.66300000  |
| H | 2.48510000  | -4.09420000 | 2.57370000  |
| H | 3.91190000  | -3.12000000 | 2.96900000  |

INT B (b)

Zero-point correction=0.592170

Sum of electronic and zero-point Energies=-2079.276869

Sum of electronic and thermal Free Energies=-2079.360133

0 1

|   |             |             |             |
|---|-------------|-------------|-------------|
| O | -0.66860000 | 4.94100000  | -0.38460000 |
| O | -2.95090000 | 2.78370000  | -1.53120000 |
| N | 1.42460000  | 2.47180000  | 0.00190000  |
| N | -0.80190000 | 0.37190000  | -1.23730000 |
| C | 0.16960000  | 2.58600000  | -0.45280000 |
| C | -0.77750000 | 1.69140000  | -0.98480000 |
| C | -0.74960000 | 3.74620000  | -0.60680000 |
| C | -1.78820000 | 2.75960000  | -1.14940000 |
| H | 1.83510000  | 1.54720000  | 0.06330000  |
| H | 0.02110000  | -0.19150000 | -1.04760000 |
| C | 2.10750000  | 3.56980000  | 0.68460000  |
| H | 2.09930000  | 3.42350000  | 1.77040000  |
| H | 3.14320000  | 3.63920000  | 0.33730000  |
| H | 1.58830000  | 4.50000000  | 0.45010000  |
| C | -5.26350000 | -0.57620000 | -0.28080000 |
| C | -4.98640000 | -2.02060000 | -0.78500000 |
| H | -5.48750000 | 0.04020000  | -1.16010000 |
| C | -3.25320000 | -2.27780000 | 1.00100000  |
| C | -3.85400000 | -1.94700000 | -1.82710000 |
| H | -5.89310000 | -2.42620000 | -1.24560000 |



|   |             |             |             |
|---|-------------|-------------|-------------|
| H | -2.40810000 | -2.97390000 | 0.99970000  |
| H | -3.42760000 | -1.99520000 | 2.04450000  |
| H | -3.68210000 | -2.93360000 | -2.27220000 |
| H | -4.15990000 | -1.28020000 | -2.64220000 |
| N | -2.84030000 | -1.05430000 | 0.27690000  |
| C | -3.93070000 | -0.05840000 | 0.36930000  |
| H | -4.08240000 | 0.15590000  | 1.43310000  |
| H | -3.61830000 | 0.87430000  | -0.10420000 |
| C | -4.52320000 | -2.92220000 | 0.37350000  |
| H | -5.31570000 | -3.04050000 | 1.11920000  |
| H | -4.30390000 | -3.92540000 | -0.01000000 |
| C | -6.43510000 | -0.47500000 | 0.65660000  |
| C | -7.55260000 | 0.21060000  | 0.41280000  |
| H | -6.33870000 | -0.99600000 | 1.61070000  |
| H | -8.36460000 | 0.25530000  | 1.13250000  |
| H | -7.69310000 | 0.75960000  | -0.51520000 |
| C | 6.52090000  | 0.99620000  | -2.52680000 |
| C | 6.37960000  | 0.66440000  | -1.05590000 |
| H | 7.04250000  | 1.95150000  | -2.63780000 |
| H | 7.09670000  | 0.22780000  | -3.05020000 |
| H | 5.54090000  | 1.08230000  | -3.00370000 |
| H | 7.34660000  | 0.56370000  | -0.55470000 |
| H | 5.79560000  | 1.41380000  | -0.51460000 |
| O | 5.67720000  | -0.60880000 | -0.96230000 |
| C | 5.44320000  | -1.05380000 | 0.27410000  |
| O | 5.83730000  | -0.55550000 | 1.30330000  |
| C | 4.71500000  | -2.37850000 | 0.26380000  |
| C | 5.56320000  | -3.55510000 | 0.64990000  |
| H | 6.38500000  | -3.68050000 | -0.06480000 |
| H | 6.01430000  | -3.36210000 | 1.62900000  |
| H | 4.98660000  | -4.48080000 | 0.69340000  |
| C | 3.40970000  | -2.52250000 | 0.00280000  |
| H | 2.88390000  | -3.46700000 | 0.00880000  |
| N | 2.53630000  | -1.42490000 | -0.33930000 |
| O | 2.92870000  | -0.26460000 | -0.19660000 |
| O | 1.41510000  | -1.73810000 | -0.75750000 |
| C | -0.06310000 | 1.64980000  | 3.15310000  |
| O | 0.86300000  | 2.24050000  | 3.66690000  |
| H | -0.63180000 | 2.08780000  | 2.30660000  |
| C | -0.50250000 | 0.26310000  | 3.56500000  |
| H | -1.58070000 | 0.22290000  | 3.74420000  |
| H | 0.03450000  | -0.03660000 | 4.46640000  |
| S | -0.05760000 | -0.93670000 | 2.23120000  |
| H | -1.14560000 | -0.74340000 | 1.41210000  |
| C | -2.55330000 | -1.41670000 | -1.13450000 |
| H | -1.81430000 | -2.22750000 | -1.07840000 |
| C | -1.90980000 | -0.26910000 | -1.95000000 |
| H | -2.65480000 | 0.51380000  | -2.11780000 |
| C | -1.41420000 | -0.78400000 | -3.31190000 |
| H | -1.01720000 | 0.04540000  | -3.90300000 |
| H | -0.61360000 | -1.52100000 | -3.17840000 |
| H | -2.21610000 | -1.25630000 | -3.88590000 |

TS (a)

Zero-point correction= 0.595165

Sum of electronic and zero-point Energies= -2079.269622

Sum of electronic and thermal Free Energies= -2079.347208

0 1

|   |             |             |             |
|---|-------------|-------------|-------------|
| O | -3.55510000 | 4.45360000  | -0.39490000 |
| O | -4.07600000 | 1.31280000  | -1.44590000 |
| N | -0.38090000 | 3.72850000  | -0.01710000 |
| N | -0.89210000 | 0.75150000  | -1.29040000 |
| C | -1.45490000 | 3.09080000  | -0.48530000 |
| C | -1.67920000 | 1.81360000  | -1.02770000 |
| C | -2.89640000 | 3.45680000  | -0.62220000 |
| C | -3.12840000 | 2.03310000  | -1.13980000 |
| H | 0.46030000  | 3.18140000  | 0.12860000  |
| H | 0.11250000  | 0.85890000  | -1.18460000 |
| C | -0.46240000 | 5.03220000  | 0.64260000  |
| H | -0.29030000 | 4.91810000  | 1.71710000  |
| H | 0.28650000  | 5.71190000  | 0.22290000  |
| H | -1.45640000 | 5.44630000  | 0.46940000  |
| C | -3.84520000 | -2.19600000 | -0.03730000 |
| C | -2.95990000 | -3.40460000 | -0.45140000 |
| H | -4.25490000 | -1.74770000 | -0.94930000 |
| C | -1.15750000 | -2.76580000 | 1.16260000  |
| C | -1.99160000 | -2.94080000 | -1.55800000 |
| H | -3.59560000 | -4.21130000 | -0.82800000 |
| H | -0.11200000 | -2.99580000 | 0.95280000  |
| H | -1.21750000 | -2.50750000 | 2.22140000  |
| H | -1.32890000 | -3.76280000 | -1.84750000 |
| H | -2.56380000 | -2.66370000 | -2.44880000 |
| N | -1.47940000 | -1.50670000 | 0.40140000  |
| C | -2.91740000 | -1.14400000 | 0.63440000  |
| H | -3.05210000 | -1.11000000 | 1.71880000  |
| H | -3.10870000 | -0.15030000 | 0.23550000  |
| C | -2.12830000 | -3.89410000 | 0.74800000  |
| H | -2.77730000 | -4.17280000 | 1.58270000  |
| H | -1.56570000 | -4.79180000 | 0.47330000  |
| C | -5.00570000 | -2.55980000 | 0.85140000  |
| C | -6.28340000 | -2.32850000 | 0.55130000  |
| H | -4.76290000 | -3.02940000 | 1.80580000  |
| H | -7.08570000 | -2.60510000 | 1.22830000  |
| H | -6.57240000 | -1.84390000 | -0.37770000 |
| C | 4.91790000  | -1.08580000 | -0.65170000 |
| O | 5.21350000  | -1.87410000 | -1.52180000 |
| C | 5.15060000  | 0.40170000  | -0.79340000 |
| C | 6.58190000  | 0.83070000  | -0.65390000 |
| H | 6.95150000  | 0.57940000  | 0.34690000  |
| H | 7.19660000  | 0.27930000  | -1.37370000 |
| H | 6.70760000  | 1.90250000  | -0.81860000 |
| C | 4.18190000  | 1.28570000  | -1.05920000 |
| H | 4.33390000  | 2.35130000  | -1.15940000 |
| N | 2.79500000  | 0.92190000  | -1.22650000 |
| O | 2.47310000  | -0.26520000 | -1.30430000 |
| O | 1.99490000  | 1.86310000  | -1.30560000 |

|   |             |             |             |
|---|-------------|-------------|-------------|
| C | -0.27690000 | 2.11440000  | 3.09120000  |
| O | 0.26370000  | 3.18470000  | 3.30620000  |
| H | -1.27420000 | 2.06990000  | 2.59880000  |
| C | 0.33260000  | 0.77260000  | 3.37080000  |
| H | -0.38430000 | 0.12390000  | 3.88760000  |
| H | 1.22570000  | 0.89680000  | 3.98700000  |
| S | 0.79510000  | 0.07050000  | 1.71680000  |
| H | -0.79020000 | -0.75500000 | 0.84100000  |
| C | -1.16250000 | -1.71800000 | -1.06430000 |
| H | -0.08940000 | -1.93410000 | -1.07490000 |
| C | -1.39910000 | -0.45400000 | -1.93080000 |
| H | -2.47480000 | -0.30520000 | -2.06420000 |
| C | -0.73640000 | -0.64770000 | -3.30540000 |
| H | -0.97150000 | 0.20410000  | -3.94770000 |
| H | 0.35160000  | -0.70730000 | -3.19620000 |
| H | -1.08150000 | -1.55680000 | -3.80670000 |
| O | 4.47250000  | -1.37330000 | 0.56870000  |
| C | 4.16360000  | -2.76740000 | 0.84250000  |
| H | 5.07150000  | -3.36060000 | 0.69590000  |
| H | 3.42320000  | -3.09580000 | 0.10700000  |
| C | 3.63470000  | -2.83460000 | 2.26070000  |
| H | 2.76040000  | -2.18520000 | 2.37050000  |
| H | 3.35300000  | -3.86600000 | 2.49790000  |
| H | 4.39810000  | -2.51700000 | 2.97680000  |

TS (b)

Zero-point correction=0.596347

Sum of electronic and zero-point Energies=-2079.268693

Sum of electronic and thermal Free Energies=-2079.346750

0 1

|   |             |             |             |
|---|-------------|-------------|-------------|
| O | 1.37163400  | 5.08848300  | -0.75512800 |
| O | 3.40526500  | 2.68259600  | 0.38264200  |
| N | -1.18194200 | 3.14892000  | -0.19203600 |
| N | 0.87607900  | 0.77767900  | 0.92817500  |
| C | 0.13370500  | 3.03370900  | -0.02887000 |
| C | 1.00595100  | 2.05010000  | 0.47443000  |
| C | 1.27368000  | 3.96818700  | -0.29561400 |
| C | 2.20034100  | 2.86966100  | 0.23487900  |
| H | -1.78329400 | 2.35696000  | 0.01358300  |
| H | -0.06024000 | 0.38776200  | 1.02664300  |
| C | -1.77700200 | 4.20882700  | -1.00295700 |
| H | -2.09481700 | 3.80427700  | -1.96957000 |
| H | -2.64625700 | 4.62964200  | -0.48912200 |
| H | -1.03640700 | 4.99356800  | -1.15985700 |
| C | 4.91486000  | -0.74763800 | 0.25499300  |
| C | 4.70073000  | -1.99753900 | 1.15482400  |
| H | 5.02934100  | 0.12581300  | 0.90679300  |
| C | 2.86817200  | -2.87369100 | -0.30159600 |
| C | 3.58793200  | -1.68126600 | 2.17354200  |
| H | 5.62985400  | -2.23071000 | 1.68294400  |
| H | 2.06265600  | -3.46295600 | 0.14110700  |
| H | 2.80573500  | -3.01025100 | -1.38170300 |
| H | 3.38486600  | -2.55968300 | 2.79463700  |

|   |             |             |             |
|---|-------------|-------------|-------------|
| H | 3.92790700  | -0.88822900 | 2.84593500  |
| N | 2.52404400  | -1.42322000 | -0.04740400 |
| C | 3.62433300  | -0.54954200 | -0.58699000 |
| H | 3.75625900  | -0.84757200 | -1.63003800 |
| H | 3.29981200  | 0.48987600  | -0.56235500 |
| C | 4.25098400  | -3.19636200 | 0.30231300  |
| H | 4.97796700  | -3.40668800 | -0.48684600 |
| H | 4.18906600  | -4.09664300 | 0.92126600  |
| C | 6.13939200  | -0.82568700 | -0.61893200 |
| C | 7.14751700  | 0.04487100  | -0.57813000 |
| H | 6.17744600  | -1.64798500 | -1.33441200 |
| H | 8.00887700  | -0.05142900 | -1.23179100 |
| H | 7.14242200  | 0.89198900  | 0.10301600  |
| C | -5.96068100 | -0.24743200 | 3.35693900  |
| C | -6.33185400 | -0.19736500 | 1.88851200  |
| H | -6.70727000 | 0.29475200  | 3.94518100  |
| H | -5.92205600 | -1.27937700 | 3.71708200  |
| H | -4.98474400 | 0.21565800  | 3.52607400  |
| H | -7.30082600 | -0.66400000 | 1.68709600  |
| H | -6.36795800 | 0.82667400  | 1.50567600  |
| O | -5.30823400 | -0.92174500 | 1.15918600  |
| C | -5.45123400 | -0.95225400 | -0.17516600 |
| O | -6.41183200 | -0.52483500 | -0.77873200 |
| C | -4.30498500 | -1.64367600 | -0.86125800 |
| C | -4.69941600 | -2.59698200 | -1.95410600 |
| H | -5.28610200 | -3.43113200 | -1.55205400 |
| H | -5.33953200 | -2.07122000 | -2.66923500 |
| H | -3.82466200 | -2.99556600 | -2.47023800 |
| C | -3.01617700 | -1.41973000 | -0.58297600 |
| H | -2.15886300 | -1.90721000 | -1.05810200 |
| N | -2.55670900 | -0.45165100 | 0.39197500  |
| O | -3.06574000 | 0.66832900  | 0.45161200  |
| O | -1.59009100 | -0.80871700 | 1.08147600  |
| C | -0.52824300 | 0.53011400  | -2.60653600 |
| O | -1.63784200 | 0.94533700  | -2.31029400 |
| H | 0.38272800  | 1.07442900  | -2.27369900 |
| C | -0.25443600 | -0.74335700 | -3.33984200 |
| H | 0.57440600  | -0.62344400 | -4.04460300 |
| H | -1.15014000 | -1.07473100 | -3.86982000 |
| S | 0.19599800  | -1.97060600 | -2.02155200 |
| H | 1.62735700  | -1.26859900 | -0.63125200 |
| C | 2.29228900  | -1.22303800 | 1.43646000  |
| H | 1.44894700  | -1.88217500 | 1.66634600  |
| C | 1.89805500  | 0.22239500  | 1.81667000  |
| H | 2.77697600  | 0.86504600  | 1.71378800  |
| C | 1.41099300  | 0.25864500  | 3.27679000  |
| H | 1.20278200  | 1.29184400  | 3.56532300  |
| H | 0.48656400  | -0.31877400 | 3.38620100  |
| H | 2.15019700  | -0.14360700 | 3.97550800  |

INT C (a)

Zero-point correction=0.596760

Sum of electronic and zero-point Energies=-2079.286521

Sum of electronic and thermal Free Energies=-2079.366371

0 1

|   |             |             |             |
|---|-------------|-------------|-------------|
| O | 1.16380000  | 5.77070000  | 0.12690000  |
| O | -0.69810000 | 4.23050000  | -2.16680000 |
| N | 1.15730000  | 3.06160000  | 1.93180000  |
| N | -0.74110000 | 1.54190000  | -0.25060000 |
| C | 0.61840000  | 3.41700000  | 0.75340000  |
| C | -0.19800000 | 2.77160000  | -0.19170000 |
| C | 0.65720000  | 4.67330000  | -0.03310000 |
| C | -0.21320000 | 3.96500000  | -1.08110000 |
| H | 1.15230000  | 2.08570000  | 2.20410000  |
| H | -0.83030000 | 1.00560000  | 0.60890000  |
| C | 1.99790000  | 3.96760000  | 2.70720000  |
| H | 1.61190000  | 4.07660000  | 3.72690000  |
| H | 3.02890000  | 3.59950000  | 2.76600000  |
| H | 1.99870000  | 4.94400000  | 2.22080000  |
| N | -2.66670000 | -0.20590000 | 0.60560000  |
| C | -6.28220000 | -0.32760000 | 0.95240000  |
| C | -7.51880000 | 0.15440000  | 0.82070000  |
| H | -6.06980000 | -0.99970000 | 1.78540000  |
| H | -8.31320000 | -0.11070000 | 1.51200000  |
| H | -7.78200000 | 0.83620000  | 0.01530000  |
| C | 0.27810000  | -5.59090000 | 1.16330000  |
| C | 0.27410000  | -4.55460000 | 0.05830000  |
| H | -0.57770000 | -6.26150000 | 1.04070000  |
| H | 1.19090000  | -6.19250000 | 1.13560000  |
| H | 0.20350000  | -5.11680000 | 2.14590000  |
| H | 0.35130000  | -5.00470000 | -0.93560000 |
| H | -0.62570000 | -3.93350000 | 0.07590000  |
| O | 1.42780000  | -3.69460000 | 0.26280000  |
| C | 1.58590000  | -2.69460000 | -0.62020000 |
| O | 0.85430000  | -2.48750000 | -1.56140000 |
| C | 2.89220000  | -1.92500000 | -0.34010000 |
| C | 4.06060000  | -2.86890000 | -0.71680000 |
| H | 4.01440000  | -3.78240000 | -0.11580000 |
| H | 3.98690000  | -3.14130000 | -1.77180000 |
| H | 5.02450000  | -2.38890000 | -0.54620000 |
| C | 3.04010000  | -1.56110000 | 1.14290000  |
| H | 2.94200000  | -2.46490000 | 1.74970000  |
| N | 1.96390000  | -0.63200000 | 1.64620000  |
| O | 0.79740000  | -0.88520000 | 1.36840000  |
| O | 2.33170000  | 0.32060000  | 2.33760000  |
| C | 5.40610000  | 0.27450000  | -0.79810000 |
| O | 5.99650000  | -0.20910000 | 0.14800000  |
| H | 5.87680000  | 0.32930000  | -1.80140000 |
| C | 3.98630000  | 0.77300000  | -0.71770000 |
| H | 3.85030000  | 1.65670000  | -1.34940000 |
| H | 3.71820000  | 1.02580000  | 0.30940000  |
| S | 2.80340000  | -0.43220000 | -1.46830000 |
| H | 3.99110000  | -1.07240000 | 1.35030000  |
| C | -4.59850000 | -1.22060000 | -0.76480000 |
| H | -5.41760000 | -1.65150000 | -1.34950000 |
| C | -4.00050000 | -2.28180000 | 0.18160000  |

|   |             |             |             |
|---|-------------|-------------|-------------|
| H | -4.77900000 | -2.73030000 | 0.80730000  |
| H | -3.57200000 | -3.09580000 | -0.41530000 |
| C | -1.69960000 | 1.12040000  | -1.28310000 |
| H | -2.50780000 | 1.86360000  | -1.35240000 |
| C | -1.03680000 | 1.00330000  | -2.66010000 |
| H | -0.21840000 | 0.27770000  | -2.62840000 |
| H | -1.76660000 | 0.67530000  | -3.40740000 |
| H | -0.65680000 | 1.97720000  | -2.97410000 |
| C | -2.28670000 | -0.23110000 | -0.83000000 |
| H | -1.47130000 | -0.96120000 | -0.90020000 |
| C | -2.90550000 | -1.58950000 | 1.05120000  |
| H | -1.95340000 | -2.12870000 | 1.00620000  |
| H | -3.20320000 | -1.55170000 | 2.10490000  |
| C | -3.89430000 | 0.58020000  | 0.82610000  |
| H | -4.09050000 | 0.58840000  | 1.90380000  |
| H | -3.70880000 | 1.61750000  | 0.53480000  |
| C | -3.48620000 | -0.70780000 | -1.70260000 |
| H | -3.17120000 | -1.49860000 | -2.39180000 |
| H | -3.87670000 | 0.11270000  | -2.31730000 |
| C | -5.12800000 | -0.00240000 | 0.04460000  |
| H | -5.47690000 | 0.74240000  | -0.68170000 |

INT C (b)

Zero-point correction= 0.596378

Sum of electronic and zero-point Energies= -2079.284485

Sum of electronic and thermal Free Energies= -2079.366174

0 1

|   |             |             |             |
|---|-------------|-------------|-------------|
| O | -2.63548400 | 5.04992800  | 0.31064300  |
| O | -4.56056000 | 2.60891100  | -0.92530200 |
| N | -0.01840200 | 3.16635100  | -0.12278400 |
| N | -1.90431400 | 0.80359800  | -1.43365900 |
| C | -1.33278800 | 3.02937600  | -0.36078100 |
| C | -2.13764300 | 2.01452100  | -0.90573200 |
| C | -2.49412200 | 3.92609700  | -0.14107200 |
| C | -3.37308000 | 2.81227300  | -0.71928300 |
| H | 0.59650200  | 2.37898100  | -0.28530200 |
| H | -0.97406500 | 0.40560400  | -1.36754800 |
| C | 0.54087600  | 4.35404700  | 0.51018000  |
| H | 0.96007800  | 4.11988500  | 1.49669500  |
| H | 1.33471900  | 4.78698000  | -0.10852800 |
| H | -0.25562100 | 5.08902300  | 0.63393900  |
| C | -5.58360500 | -1.46515700 | 0.52895900  |
| C | -5.00423500 | -2.72421100 | -0.17616100 |
| H | -6.25067900 | -0.96889300 | -0.18698300 |
| C | -2.87350400 | -2.37489200 | 1.09592300  |
| C | -4.29780300 | -2.25295400 | -1.46390600 |
| H | -5.81938600 | -3.41178100 | -0.42518100 |
| H | -1.87300300 | -2.74878200 | 0.84774000  |
| H | -2.87931500 | -2.16110500 | 2.17060800  |
| H | -3.98001900 | -3.11338400 | -2.06394100 |
| H | -5.00873200 | -1.68361000 | -2.07601700 |
| N | -3.07919100 | -1.09953200 | 0.38893700  |
| C | -4.36297400 | -0.52001100 | 0.82782100  |

|   |             |             |             |
|---|-------------|-------------|-------------|
| H | -4.28185500 | -0.33007900 | 1.90389200  |
| H | -4.51042800 | 0.44997500  | 0.34849900  |
| C | -3.97012800 | -3.42381000 | 0.72851500  |
| H | -4.44938000 | -3.82910800 | 1.62552500  |
| H | -3.53546300 | -4.27666600 | 0.19348000  |
| C | -6.38949200 | -1.77526800 | 1.75971200  |
| C | -7.69629200 | -1.54681300 | 1.89785300  |
| H | -5.84321700 | -2.20379400 | 2.60168400  |
| H | -8.22479500 | -1.78260900 | 2.81686800  |
| H | -8.28537500 | -1.10755600 | 1.09616400  |
| C | -3.07120600 | -1.36763800 | -1.06429900 |
| H | -2.14684800 | -1.93360900 | -1.24898700 |
| C | -2.97313200 | -0.07788500 | -1.91330200 |
| H | -3.90111900 | 0.49349500  | -1.82207800 |
| C | -2.73564500 | -0.41032100 | -3.39419600 |
| H | -2.70417200 | 0.50775700  | -3.98637900 |
| H | -1.78091600 | -0.93365700 | -3.52612300 |
| H | -3.52737700 | -1.04890100 | -3.79582400 |
| C | 2.83497400  | 0.24672300  | 4.45509900  |
| C | 3.70470200  | 0.75974400  | 3.32609500  |
| H | 2.87213000  | 0.94933200  | 5.29283800  |
| H | 1.79330800  | 0.15068600  | 4.13667100  |
| H | 3.18324200  | -0.72723300 | 4.81040300  |
| H | 3.36645300  | 1.72818400  | 2.94778300  |
| H | 4.75335200  | 0.86046900  | 3.61947800  |
| O | 3.62435700  | -0.20397500 | 2.23774200  |
| C | 4.31750500  | 0.10127700  | 1.12675700  |
| O | 5.02416300  | 1.07492900  | 1.01174600  |
| C | 4.16681300  | -1.02906300 | 0.08239500  |
| C | 5.00471000  | -2.23430400 | 0.56790600  |
| H | 6.05742600  | -1.96283900 | 0.66026100  |
| H | 4.64746100  | -2.56723700 | 1.54720200  |
| H | 4.92924800  | -3.06238700 | -0.14144000 |
| C | 2.71129800  | -1.50768000 | -0.03053300 |
| H | 2.35093800  | -1.82763100 | 0.94988200  |
| N | 1.72894700  | -0.44399000 | -0.46588400 |
| O | 0.80917700  | -0.80843300 | -1.19212300 |
| O | 1.88101900  | 0.69471500  | -0.03164700 |
| C | 7.29556300  | -1.23386100 | -1.73093900 |
| O | 7.98933000  | -1.72312400 | -0.86637400 |
| H | 7.25113900  | -1.67239200 | -2.75091100 |
| C | 6.41244700  | -0.02340800 | -1.51799300 |
| H | 6.55456300  | 0.69187900  | -2.33525400 |
| H | 6.60649300  | 0.47002400  | -0.56658100 |
| S | 4.62928500  | -0.47516300 | -1.63238700 |
| H | 2.60144700  | -2.31568400 | -0.75220200 |

INT D (a)

Zero-point correction=0.715679

Sum of electronic and zero-point Energies=-2362.956821

Sum of electronic and thermal Free Energies=-2363.043426

0 1

|   |            |             |             |
|---|------------|-------------|-------------|
| O | 4.85650000 | -3.47910000 | -1.54710000 |
|---|------------|-------------|-------------|

|   |             |             |             |
|---|-------------|-------------|-------------|
| O | 4.84720000  | -0.17050000 | -1.99810000 |
| N | 1.59780000  | -3.45020000 | -1.48860000 |
| N | 1.59820000  | -0.18010000 | -1.79930000 |
| C | 2.55050000  | -2.52560000 | -1.64400000 |
| C | 2.55090000  | -1.12520000 | -1.78660000 |
| C | 4.03260000  | -2.58830000 | -1.68420000 |
| C | 4.02630000  | -1.07080000 | -1.87570000 |
| H | 0.63350000  | -3.14600000 | -1.40730000 |
| H | 0.62170000  | -0.43960000 | -1.68680000 |
| C | 1.89790000  | -4.85670000 | -1.24950000 |
| H | 1.57450000  | -5.15770000 | -0.24650000 |
| H | 1.39170000  | -5.49060000 | -1.98550000 |
| H | 2.97550000  | -5.00360000 | -1.33250000 |
| C | 4.00540000  | 3.33540000  | 0.55410000  |
| C | 2.62830000  | 4.04970000  | 0.46900000  |
| H | 4.56140000  | 3.58810000  | -0.35710000 |
| C | 1.64080000  | 2.12770000  | 1.73470000  |
| C | 1.93200000  | 3.56040000  | -0.81560000 |
| H | 2.78060000  | 5.13300000  | 0.42550000  |
| H | 0.59930000  | 1.79640000  | 1.79230000  |
| H | 2.15230000  | 1.72830000  | 2.61690000  |
| H | 1.02290000  | 4.14120000  | -1.00600000 |
| H | 2.60010000  | 3.72740000  | -1.66950000 |
| N | 2.26040000  | 1.49290000  | 0.54360000  |
| C | 3.71370000  | 1.79390000  | 0.55400000  |
| H | 4.12980000  | 1.33010000  | 1.45580000  |
| H | 4.18890000  | 1.30630000  | -0.29970000 |
| C | 1.74850000  | 3.67850000  | 1.67730000  |
| H | 2.16840000  | 4.07810000  | 2.60550000  |
| H | 0.75850000  | 4.13410000  | 1.56110000  |
| C | 4.84090000  | 3.76510000  | 1.72930000  |
| C | 6.01120000  | 4.39830000  | 1.64310000  |
| H | 4.45150000  | 3.51910000  | 2.71850000  |
| H | 6.57600000  | 4.67920000  | 2.52700000  |
| H | 6.45110000  | 4.65470000  | 0.68210000  |
| C | 1.59160000  | 2.04360000  | -0.66970000 |
| H | 0.51700000  | 1.92890000  | -0.47840000 |
| C | 1.89300000  | 1.24570000  | -1.96150000 |
| H | 2.96010000  | 1.31510000  | -2.19190000 |
| C | 1.08190000  | 1.79080000  | -3.14740000 |
| H | 1.32750000  | 1.23180000  | -4.05380000 |
| H | 0.00680000  | 1.68250000  | -2.96300000 |
| H | 1.28960000  | 2.84760000  | -3.33280000 |
| S | -4.65480000 | -0.93050000 | 2.15590000  |
| C | -3.84700000 | -2.58620000 | 2.26970000  |
| H | -3.35240000 | -2.71000000 | 3.23960000  |
| H | -4.59810000 | -3.37690000 | 2.16840000  |
| C | -3.49110000 | -0.28240000 | 0.82400000  |
| C | -4.37540000 | 0.14610000  | -0.36110000 |
| O | -4.48260000 | -0.50790000 | -1.37720000 |
| O | -4.99440000 | 1.29980000  | -0.08510000 |
| C | -5.96280000 | 1.91340000  | -1.02710000 |
| C | -5.24450000 | 2.28580000  | -2.32660000 |



|   |             |             |             |
|---|-------------|-------------|-------------|
| C | -7.13580000 | 0.95740000  | -1.25750000 |
| C | -6.41270000 | 3.16270000  | -0.26840000 |
| H | -4.38180000 | 2.92540000  | -2.11600000 |
| H | -4.90500000 | 1.39710000  | -2.85900000 |
| H | -5.92940000 | 2.84290000  | -2.97350000 |
| H | -7.58230000 | 0.66390000  | -0.30290000 |
| H | -7.90370000 | 1.46360000  | -1.85100000 |
| H | -6.81710000 | 0.06110000  | -1.79000000 |
| H | -7.14050000 | 3.72040000  | -0.86490000 |
| H | -6.87950000 | 2.89060000  | 0.68230000  |
| H | -5.56170000 | 3.81740000  | -0.06060000 |
| C | -2.84740000 | -2.64000000 | 1.16870000  |
| H | -2.24560000 | -3.52190000 | 0.99230000  |
| C | -2.70210000 | -1.52070000 | 0.45600000  |
| N | -1.72520000 | -1.47680000 | -0.61120000 |
| O | -1.41430000 | -0.37380000 | -1.07380000 |
| O | -1.24470000 | -2.54220000 | -1.00700000 |
| C | -2.64180000 | 0.87090000  | 1.38770000  |
| H | -3.29380000 | 1.62790000  | 1.82520000  |
| H | -1.96490000 | 0.48570000  | 2.15280000  |
| H | -2.05030000 | 1.32930000  | 0.59270000  |
| C | 2.38880000  | -2.18510000 | 2.04670000  |
| N | 0.19210000  | -2.58190000 | 2.22360000  |
| N | 0.32980000  | -1.44050000 | 1.59400000  |
| C | 3.88340000  | -2.22390000 | 2.06140000  |
| H | 4.31110000  | -1.22310000 | 2.17170000  |
| H | 4.23470000  | -2.83370000 | 2.89740000  |
| H | 4.28760000  | -2.65860000 | 1.14070000  |
| C | 1.42980000  | -3.06530000 | 2.51790000  |
| H | 1.56740000  | -3.99780000 | 3.04570000  |
| N | 1.65100000  | -1.19620000 | 1.48270000  |
| H | 1.95070000  | -0.30990000 | 1.02030000  |

INT E (a)

Zero-point correction= 0.718448

Sum of electronic and zero-point Energies= -2362.948082

Sum of electronic and thermal Free Energies= -2363.032676

0 1

|   |             |             |             |
|---|-------------|-------------|-------------|
| O | -3.44800000 | -3.96210000 | -3.23850000 |
| O | -4.96370000 | -2.24370000 | -0.80380000 |
| N | -0.68050000 | -3.89160000 | -1.53230000 |
| N | -2.19690000 | -2.24560000 | 0.89790000  |
| C | -1.92980000 | -3.44310000 | -1.32570000 |
| C | -2.56780000 | -2.72540000 | -0.29920000 |
| C | -3.16490000 | -3.49950000 | -2.14730000 |
| C | -3.85980000 | -2.71750000 | -1.02750000 |
| H | 0.01560000  | -3.75350000 | -0.81140000 |
| H | -1.21420000 | -2.22520000 | 1.14820000  |
| C | -0.31910000 | -4.69710000 | -2.69440000 |
| H | 0.55530000  | -4.27370000 | -3.19930000 |
| H | -0.08850000 | -5.72960000 | -2.40600000 |
| H | -1.16280000 | -4.70550000 | -3.38560000 |
| C | -4.56330000 | 1.88710000  | 0.79290000  |

|   |             |             |             |
|---|-------------|-------------|-------------|
| C | -3.93480000 | 2.11360000  | 2.19660000  |
| H | -5.50340000 | 1.34110000  | 0.93980000  |
| C | -1.67320000 | 1.90540000  | 1.14110000  |
| C | -3.74370000 | 0.73070000  | 2.85050000  |
| H | -4.60790000 | 2.72750000  | 2.80400000  |
| H | -0.72170000 | 1.65300000  | 1.62260000  |
| H | -1.43360000 | 2.42650000  | 0.20760000  |
| H | -3.42330000 | 0.84080000  | 3.89270000  |
| H | -4.70680000 | 0.20550000  | 2.86750000  |
| N | -2.35120000 | 0.64740000  | 0.77700000  |
| C | -3.56260000 | 0.97160000  | -0.00320000 |
| H | -3.23370000 | 1.47260000  | -0.92040000 |
| H | -4.05650000 | 0.04700000  | -0.30970000 |
| C | -2.55650000 | 2.79240000  | 2.07070000  |
| H | -2.65580000 | 3.80870000  | 1.67520000  |
| H | -2.10550000 | 2.88840000  | 3.06530000  |
| C | -4.88570000 | 3.16050000  | 0.06110000  |
| C | -6.11060000 | 3.55460000  | -0.28930000 |
| H | -4.03680000 | 3.79050000  | -0.21070000 |
| H | -6.28190000 | 4.48220000  | -0.82750000 |
| H | -6.98920000 | 2.95810000  | -0.05530000 |
| C | -2.68460000 | -0.07340000 | 2.02650000  |
| H | -1.74530000 | -0.11330000 | 2.59420000  |
| C | -3.12150000 | -1.53760000 | 1.78990000  |
| H | -4.09520000 | -1.55570000 | 1.29230000  |
| C | -3.22880000 | -2.29810000 | 3.12090000  |
| H | -3.57400000 | -3.31980000 | 2.94360000  |
| H | -2.25330000 | -2.34990000 | 3.61870000  |
| H | -3.93120000 | -1.81520000 | 3.80600000  |
| S | 3.14130000  | 0.17930000  | -2.39940000 |
| C | 4.47180000  | -0.05000000 | -1.17010000 |
| H | 5.31470000  | -0.56170000 | -1.63810000 |
| H | 4.80420000  | 0.91110000  | -0.77160000 |
| C | 1.85920000  | 0.41710000  | -1.04790000 |
| C | 1.93430000  | 1.92910000  | -0.73970000 |
| O | 2.66630000  | 2.38440000  | 0.12430000  |
| O | 1.16820000  | 2.63350000  | -1.56580000 |
| C | 1.26320000  | 4.11920000  | -1.66610000 |
| C | 0.84010000  | 4.76270000  | -0.34440000 |
| C | 2.68620000  | 4.50400000  | -2.07600000 |
| C | 0.26420000  | 4.43280000  | -2.77970000 |
| H | -0.16640000 | 4.44160000  | -0.06230000 |
| H | 1.53210000  | 4.51060000  | 0.45900000  |
| H | 0.82430000  | 5.85040000  | -0.46560000 |
| H | 2.98040000  | 3.97140000  | -2.98480000 |
| H | 2.72160000  | 5.57770000  | -2.28380000 |
| H | 3.40320000  | 4.28230000  | -1.28460000 |
| H | 0.23330000  | 5.51160000  | -2.95700000 |
| H | 0.55200000  | 3.93700000  | -3.71060000 |
| H | -0.74060000 | 4.09940000  | -2.50590000 |
| C | 3.81450000  | -0.93840000 | -0.10500000 |
| H | 3.65850000  | -1.92500000 | -0.54520000 |
| C | 2.42320000  | -0.35290000 | 0.20370000  |

|   |             |             |             |
|---|-------------|-------------|-------------|
| N | 1.47130000  | -1.45560000 | 0.61700000  |
| O | 0.64880000  | -1.17370000 | 1.48700000  |
| O | 1.54180000  | -2.54350000 | 0.04900000  |
| C | 0.48750000  | -0.03950000 | -1.55620000 |
| H | 0.21450000  | 0.54060000  | -2.43790000 |
| H | 0.51760000  | -1.09490000 | -1.83310000 |
| H | -0.29220000 | 0.10860000  | -0.79990000 |
| C | 5.09500000  | -0.41240000 | 2.09210000  |
| N | 5.99260000  | -2.46710000 | 2.16310000  |
| N | 5.21390000  | -2.44360000 | 1.12700000  |
| C | 4.68330000  | 0.99320000  | 2.39190000  |
| H | 3.72710000  | 1.02670000  | 2.92790000  |
| H | 5.43260000  | 1.45550000  | 3.03870000  |
| H | 4.56900000  | 1.61070000  | 1.49930000  |
| C | 5.94860000  | -1.25170000 | 2.77700000  |
| H | 6.52060000  | -1.04320000 | 3.66940000  |
| N | 4.64430000  | -1.19900000 | 1.06350000  |
| H | 2.43260000  | 0.32280000  | 1.05420000  |

INT E (b)

Zero-point correction=0.718283

Sum of electronic and zero-point Energies= -2362.942252

Sum of electronic and thermal Free Energies= -2363.027313

0 1

|   |             |             |             |
|---|-------------|-------------|-------------|
| O | 2.92070000  | 5.69590000  | -0.14590000 |
| O | 4.66960000  | 3.23630000  | 1.29920000  |
| N | 0.41800000  | 3.64460000  | -0.53300000 |
| N | 2.12150000  | 1.23490000  | 0.89390000  |
| C | 1.64740000  | 3.55370000  | 0.00150000  |
| C | 2.38540000  | 2.51800000  | 0.59660000  |
| C | 2.75780000  | 4.52540000  | 0.15510000  |
| C | 3.55810000  | 3.39660000  | 0.81720000  |
| H | -0.21830000 | 2.86300000  | -0.43150000 |
| H | 1.34520000  | 0.79570000  | 0.41120000  |
| C | -0.11860000 | 4.90140000  | -1.03950000 |
| H | -0.50290000 | 4.77640000  | -2.05800000 |
| H | -0.93240000 | 5.27450000  | -0.40520000 |
| H | 0.68310000  | 5.64120000  | -1.04980000 |
| C | 6.35510000  | -0.64790000 | -0.35090000 |
| C | 5.66230000  | -1.99300000 | 0.00710000  |
| H | 6.81930000  | -0.26660000 | 0.56720000  |
| C | 3.91740000  | -1.45420000 | -1.71040000 |
| C | 4.64490000  | -1.70430000 | 1.12960000  |
| H | 6.41360000  | -2.71050000 | 0.35370000  |
| H | 2.89950000  | -1.85160000 | -1.80420000 |
| H | 4.20760000  | -1.08070000 | -2.69860000 |
| H | 4.22970000  | -2.63870000 | 1.52480000  |
| H | 5.16030000  | -1.20930000 | 1.96230000  |
| N | 3.88270000  | -0.30400000 | -0.79310000 |
| C | 5.21080000  | 0.33790000  | -0.79400000 |
| H | 5.39440000  | 0.70290000  | -1.81050000 |
| H | 5.19200000  | 1.21700000  | -0.14580000 |
| C | 4.90730000  | -2.55460000 | -1.21500000 |

|   |             |             |             |
|---|-------------|-------------|-------------|
| H | 5.60690000  | -2.84610000 | -2.00520000 |
| H | 4.37010000  | -3.46530000 | -0.92210000 |
| C | 7.43760000  | -0.78040000 | -1.38590000 |
| C | 8.73340000  | -0.54520000 | -1.17450000 |
| H | 7.11820000  | -1.07570000 | -2.38690000 |
| H | 9.47050000  | -0.64690000 | -1.96550000 |
| H | 9.10390000  | -0.23380000 | -0.20060000 |
| C | 3.51300000  | -0.79360000 | 0.55180000  |
| H | 2.61110000  | -1.40450000 | 0.40080000  |
| C | 3.11050000  | 0.34480000  | 1.51480000  |
| H | 3.98170000  | 0.96790000  | 1.73720000  |
| C | 2.54860000  | -0.21160000 | 2.83220000  |
| H | 2.28730000  | 0.61130000  | 3.50250000  |
| H | 1.64790000  | -0.81150000 | 2.66010000  |
| H | 3.28090000  | -0.84380000 | 3.34300000  |
| S | -4.54570000 | -2.33760000 | 0.39600000  |
| C | -3.45220000 | -3.01990000 | -0.90740000 |
| H | -3.29570000 | -4.08210000 | -0.71140000 |
| H | -3.90430000 | -2.90420000 | -1.89660000 |
| C | -3.83810000 | -0.60010000 | 0.27840000  |
| C | -4.89860000 | 0.22610000  | -0.49240000 |
| O | -4.84590000 | 0.41000000  | -1.69650000 |
| O | -5.85820000 | 0.64680000  | 0.32360000  |
| C | -7.05840000 | 1.37490000  | -0.17380000 |
| C | -6.62690000 | 2.70160000  | -0.80230000 |
| C | -7.82830000 | 0.47970000  | -1.14660000 |
| C | -7.85310000 | 1.60590000  | 1.11150000  |
| H | -6.02470000 | 3.28090000  | -0.09610000 |
| H | -6.05020000 | 2.54200000  | -1.71360000 |
| H | -7.51660000 | 3.28890000  | -1.04950000 |
| H | -8.05230000 | -0.48490000 | -0.68150000 |
| H | -8.77640000 | 0.96110000  | -1.40550000 |
| H | -7.26320000 | 0.30960000  | -2.06330000 |
| H | -8.77750000 | 2.14460000  | 0.88480000  |
| H | -8.11330000 | 0.65440000  | 1.58330000  |
| H | -7.27330000 | 2.19920000  | 1.82400000  |
| C | -2.13580000 | -2.22510000 | -0.83600000 |
| H | -1.60050000 | -2.31220000 | -1.78500000 |
| C | -2.60570000 | -0.76880000 | -0.66730000 |
| N | -1.49250000 | 0.21890000  | -0.43970000 |
| O | -1.81860000 | 1.37060000  | -0.16200000 |
| O | -0.34020000 | -0.15550000 | -0.63550000 |
| C | -3.59490000 | -0.07230000 | 1.69880000  |
| H | -4.51250000 | -0.17560000 | 2.27950000  |
| H | -2.79910000 | -0.64410000 | 2.17300000  |
| H | -3.32880000 | 0.98580000  | 1.67590000  |
| C | -0.28830000 | -3.70890000 | 0.04850000  |
| N | -0.27660000 | -2.83540000 | 2.10830000  |
| N | -1.19630000 | -2.20370000 | 1.43930000  |
| C | -0.03020000 | -4.46980000 | -1.20990000 |
| H | -0.91010000 | -5.02880000 | -1.54750000 |
| H | 0.28110000  | -3.80980000 | -2.02810000 |
| H | 0.77400000  | -5.18880000 | -1.04270000 |

|   |             |             |             |
|---|-------------|-------------|-------------|
| C | 0.29820000  | -3.76480000 | 1.29540000  |
| H | 1.09210000  | -4.40990000 | 1.64120000  |
| N | -1.22450000 | -2.72270000 | 0.18710000  |
| H | -2.98400000 | -0.46080000 | -1.65150000 |

INT E (c)

Zero-point correction=0.718185

Sum of electronic and zero-point Energies=-2362.946050

Sum of electronic and thermal Free Energies=-2363.032288

0 1

|   |             |             |             |
|---|-------------|-------------|-------------|
| O | -2.85390000 | 5.40270000  | -1.17550000 |
| O | -4.91170000 | 2.77300000  | -1.36860000 |
| N | -0.30560000 | 3.39600000  | -1.41710000 |
| N | -2.33010000 | 0.81500000  | -1.71030000 |
| C | -1.64150000 | 3.23370000  | -1.40610000 |
| C | -2.50350000 | 2.13010000  | -1.51050000 |
| C | -2.76700000 | 4.19140000  | -1.29210000 |
| C | -3.70980000 | 2.98620000  | -1.39260000 |
| H | 0.29180000  | 2.57920000  | -1.39080000 |
| H | -1.38830000 | 0.44450000  | -1.65360000 |
| C | 0.31520000  | 4.68900000  | -1.15890000 |
| H | 0.79190000  | 4.71770000  | -0.17030000 |
| H | 1.07460000  | 4.91020000  | -1.91710000 |
| H | -0.45760000 | 5.45820000  | -1.19370000 |
| C | -5.50370000 | -0.64220000 | 1.67520000  |
| C | -4.85800000 | -2.02310000 | 1.37100000  |
| H | -6.36450000 | -0.52680000 | 1.00420000  |
| C | -2.64560000 | -1.01660000 | 1.99170000  |
| C | -4.44970000 | -2.02460000 | -0.11670000 |
| H | -5.58680000 | -2.81800000 | 1.56280000  |
| H | -1.63660000 | -1.35680000 | 1.73930000  |
| H | -2.56910000 | -0.39330000 | 2.89010000  |
| H | -4.13000000 | -3.02570000 | -0.42630000 |
| H | -5.32090000 | -1.75830000 | -0.73000000 |
| N | -3.13830000 | -0.15760000 | 0.89860000  |
| C | -4.42090000 | 0.44090000  | 1.31100000  |
| H | -4.21740000 | 1.08210000  | 2.17590000  |
| H | -4.78810000 | 1.09720000  | 0.51850000  |
| C | -3.59360000 | -2.23270000 | 2.23010000  |
| H | -3.85440000 | -2.33470000 | 3.28900000  |
| H | -3.10440000 | -3.16720000 | 1.93260000  |
| C | -6.00660000 | -0.50720000 | 3.08540000  |
| C | -7.28530000 | -0.35470000 | 3.43350000  |
| H | -5.25050000 | -0.52230000 | 3.87200000  |
| H | -7.58850000 | -0.25260000 | 4.47150000  |
| H | -8.07770000 | -0.32040000 | 2.68930000  |
| C | -3.28860000 | -0.99810000 | -0.30890000 |
| H | -2.34620000 | -1.55400000 | -0.39580000 |
| C | -3.42140000 | -0.16260000 | -1.60280000 |
| H | -4.34810000 | 0.41820000  | -1.58250000 |
| C | -3.41670000 | -1.05970000 | -2.84830000 |
| H | -3.52000000 | -0.45320000 | -3.75200000 |
| H | -2.47750000 | -1.62190000 | -2.91770000 |

|   |             |             |             |
|---|-------------|-------------|-------------|
| H | -4.23670000 | -1.78210000 | -2.82400000 |
| S | 4.96910000  | -2.00760000 | 0.07890000  |
| C | 3.43520000  | -2.68010000 | 0.84800000  |
| H | 3.44000000  | -3.76450000 | 0.73350000  |
| H | 3.41800000  | -2.43440000 | 1.90960000  |
| C | 4.10450000  | -0.45340000 | -0.48320000 |
| C | 3.96850000  | 0.44780000  | 0.76140000  |
| O | 3.11820000  | 0.25090000  | 1.61090000  |
| O | 4.91120000  | 1.38260000  | 0.78790000  |
| C | 5.03830000  | 2.34370000  | 1.92200000  |
| C | 3.77030000  | 3.19500000  | 2.01020000  |
| C | 5.32820000  | 1.57510000  | 3.21260000  |
| C | 6.24180000  | 3.18630000  | 1.49960000  |
| H | 3.56410000  | 3.67430000  | 1.04860000  |
| H | 2.90650000  | 2.59670000  | 2.30040000  |
| H | 3.91710000  | 3.98200000  | 2.75630000  |
| H | 6.20070000  | 0.92730000  | 3.08490000  |
| H | 5.55040000  | 2.28850000  | 4.01210000  |
| H | 4.47450000  | 0.96870000  | 3.51560000  |
| H | 6.44480000  | 3.94760000  | 2.25790000  |
| H | 7.13350000  | 2.56280000  | 1.38870000  |
| H | 6.04880000  | 3.68990000  | 0.54830000  |
| C | 2.20660000  | -2.03540000 | 0.14620000  |
| H | 1.63530000  | -1.48200000 | 0.88930000  |
| C | 2.74560000  | -1.03180000 | -0.91390000 |
| N | 1.69780000  | 0.02280000  | -1.22070000 |
| O | 1.96140000  | 1.20550000  | -1.01280000 |
| O | 0.64280000  | -0.39170000 | -1.68950000 |
| C | 4.88440000  | 0.17630000  | -1.63970000 |
| H | 5.89300000  | 0.44230000  | -1.32250000 |
| H | 4.95260000  | -0.52450000 | -2.47630000 |
| H | 4.38670000  | 1.08920000  | -1.97410000 |
| C | 1.36810000  | -3.95950000 | -1.36590000 |
| N | -0.65200000 | -3.98140000 | -0.39600000 |
| N | 0.02810000  | -3.04190000 | 0.18640000  |
| C | 2.55850000  | -4.21380000 | -2.23500000 |
| H | 3.50430000  | -4.15370000 | -1.69000000 |
| H | 2.48250000  | -5.21330000 | -2.66900000 |
| H | 2.61220000  | -3.50470000 | -3.07040000 |
| C | 0.12890000  | -4.56480000 | -1.34770000 |
| H | -0.23200000 | -5.37760000 | -1.96090000 |
| N | 1.26490000  | -3.00580000 | -0.38920000 |
| H | 2.87640000  | -1.54030000 | -1.87040000 |

INT E (d)

Zero-point correction=0.718434

Sum of electronic and zero-point Energies=-2362.936694

Sum of electronic and thermal Free Energies=-2363.022647

0 1

|   |             |            |             |
|---|-------------|------------|-------------|
| O | -2.65400000 | 5.41890000 | -0.56710000 |
| O | -4.66160000 | 2.92900000 | -1.54120000 |
| N | -0.19420000 | 3.30930000 | -0.31780000 |
| N | -2.16030000 | 0.85310000 | -1.29240000 |

|   |             |             |             |
|---|-------------|-------------|-------------|
| C | -1.48710000 | 3.21540000  | -0.67220000 |
| C | -2.33320000 | 2.16470000  | -1.06430000 |
| C | -2.57530000 | 4.21820000  | -0.76750000 |
| C | -3.49380000 | 3.07540000  | -1.21390000 |
| H | 0.40290000  | 2.49390000  | -0.37490000 |
| H | -1.29210000 | 0.42850000  | -0.98750000 |
| C | 0.43060000  | 4.58310000  | 0.01290000  |
| H | 0.89870000  | 4.54210000  | 1.00330000  |
| H | 1.19830000  | 4.85390000  | -0.72270000 |
| H | -0.33880000 | 5.35650000  | 0.01680000  |
| C | -6.29650000 | -0.57490000 | 0.84580000  |
| C | -5.64550000 | -1.97530000 | 0.66780000  |
| H | -6.89700000 | -0.37700000 | -0.05110000 |
| C | -3.70140000 | -1.12990000 | 2.00780000  |
| C | -4.79170000 | -1.92620000 | -0.61630000 |
| H | -6.42870000 | -2.73480000 | 0.57250000  |
| H | -2.67460000 | -1.51020000 | 2.06520000  |
| H | -3.88320000 | -0.55830000 | 2.92470000  |
| H | -4.43760000 | -2.92720000 | -0.88680000 |
| H | -5.41570000 | -1.57350000 | -1.44770000 |
| N | -3.78870000 | -0.19370000 | 0.87520000  |
| C | -5.11160000 | 0.45930000  | 0.90780000  |
| H | -5.16310000 | 1.04290000  | 1.83360000  |
| H | -5.18300000 | 1.17510000  | 0.08610000  |
| C | -4.72630000 | -2.29810000 | 1.86410000  |
| H | -5.31090000 | -2.42990000 | 2.78070000  |
| H | -4.21530000 | -3.25140000 | 1.68060000  |
| C | -7.21190000 | -0.47900000 | 2.03480000  |
| C | -8.52830000 | -0.27240000 | 1.97500000  |
| H | -6.74290000 | -0.57110000 | 3.01600000  |
| H | -9.13850000 | -0.20170000 | 2.87060000  |
| H | -9.04400000 | -0.15970000 | 1.02410000  |
| C | -3.58680000 | -0.96290000 | -0.37130000 |
| H | -2.68620000 | -1.56840000 | -0.19840000 |
| C | -3.26810000 | -0.06470000 | -1.58850000 |
| H | -4.12980000 | 0.56680000  | -1.82320000 |
| C | -2.90690000 | -0.90970000 | -2.81860000 |
| H | -2.68520000 | -0.25980000 | -3.66930000 |
| H | -2.02840000 | -1.53460000 | -2.61960000 |
| H | -3.72780000 | -1.57370000 | -3.10180000 |
| S | 5.37720000  | -1.93790000 | -0.99640000 |
| C | 3.99480000  | -2.88490000 | -0.26480000 |
| H | 4.18670000  | -3.95200000 | -0.39270000 |
| H | 3.90570000  | -2.64700000 | 0.79360000  |
| C | 4.34030000  | -0.38120000 | -1.05420000 |
| C | 4.39070000  | 0.17350000  | 0.38140000  |
| O | 3.64640000  | -0.23820000 | 1.25690000  |
| O | 5.35400000  | 1.07260000  | 0.52610000  |
| C | 5.67060000  | 1.69500000  | 1.84440000  |
| C | 4.45830000  | 2.48930000  | 2.33430000  |
| C | 6.10720000  | 0.60900000  | 2.82930000  |
| C | 6.83480000  | 2.62110000  | 1.49340000  |
| H | 4.14020000  | 3.20900000  | 1.57450000  |

|   |             |             |             |
|---|-------------|-------------|-------------|
| H | 3.62140000  | 1.83280000  | 2.57270000  |
| H | 4.73360000  | 3.04640000  | 3.23510000  |
| H | 6.92610000  | 0.01800000  | 2.40870000  |
| H | 6.46770000  | 1.08220000  | 3.74790000  |
| H | 5.28120000  | -0.05560000 | 3.08340000  |
| H | 7.16770000  | 3.15340000  | 2.38880000  |
| H | 7.67900000  | 2.05020000  | 1.09680000  |
| H | 6.53190000  | 3.35890000  | 0.74550000  |
| C | 2.77630000  | -2.44270000 | -1.08400000 |
| H | 2.87280000  | -2.90780000 | -2.06650000 |
| C | 2.91130000  | -0.89520000 | -1.39310000 |
| N | 1.83900000  | 0.04740000  | -0.85260000 |
| O | 2.15250000  | 1.23620000  | -0.77710000 |
| O | 0.71540000  | -0.38320000 | -0.64290000 |
| C | 4.91310000  | 0.56380000  | -2.11370000 |
| H | 5.94960000  | 0.81420000  | -1.88530000 |
| H | 4.87610000  | 0.09080000  | -3.09860000 |
| H | 4.33490000  | 1.48970000  | -2.13860000 |
| C | 0.91200000  | -3.06990000 | 0.61470000  |
| N | -0.45550000 | -3.74910000 | -1.02990000 |
| N | 0.64480000  | -3.36950000 | -1.60030000 |
| C | 1.50650000  | -2.71210000 | 1.93760000  |
| H | 1.97290000  | -1.72500000 | 1.92540000  |
| H | 0.71630000  | -2.71160000 | 2.69160000  |
| H | 2.26150000  | -3.44030000 | 2.25590000  |
| C | -0.33140000 | -3.58650000 | 0.31750000  |
| H | -1.12630000 | -3.85120000 | 0.99940000  |
| N | 1.50150000  | -2.95480000 | -0.61570000 |
| H | 2.75530000  | -0.77040000 | -2.46800000 |



## 7. <sup>1</sup>H, <sup>13</sup>C NMR spectra of compounds 3 and 4

zxy1073 cdcl3

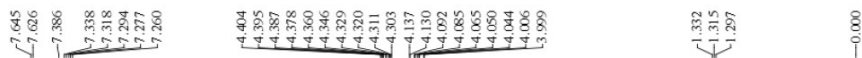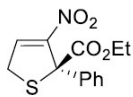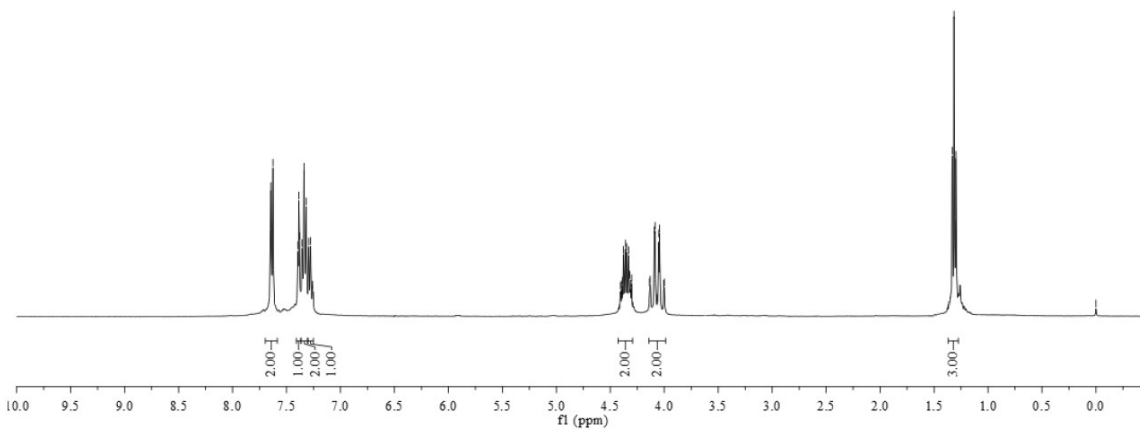

zxy1073 c13 cdcl3

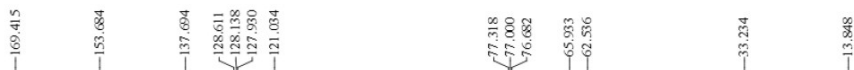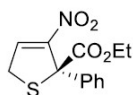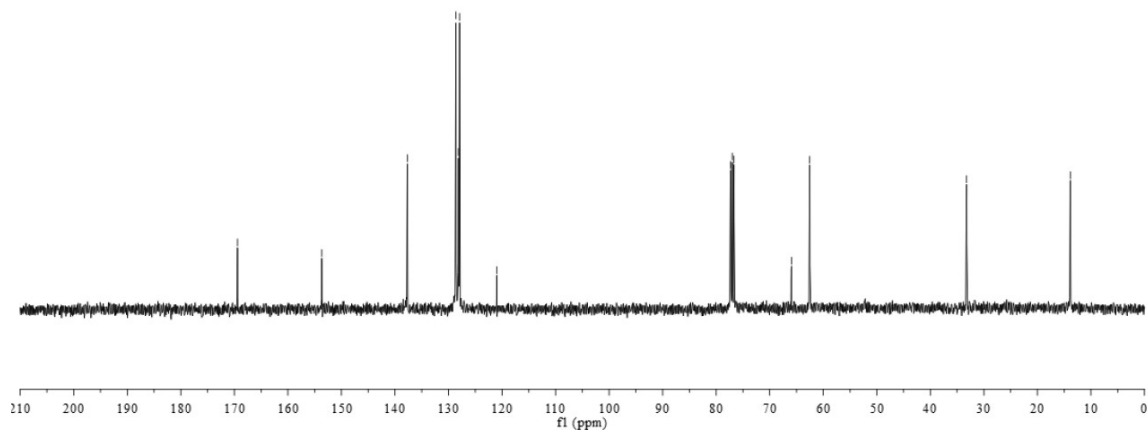

zxy1080 cdcl3

7.633  
7.615  
7.388  
7.357  
7.324  
7.305  
7.291  
7.273  
7.258  
5.329  
5.320  
4.142  
4.135  
4.098  
4.090  
4.044  
4.037  
4.000  
3.993

0.000

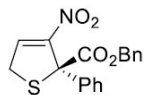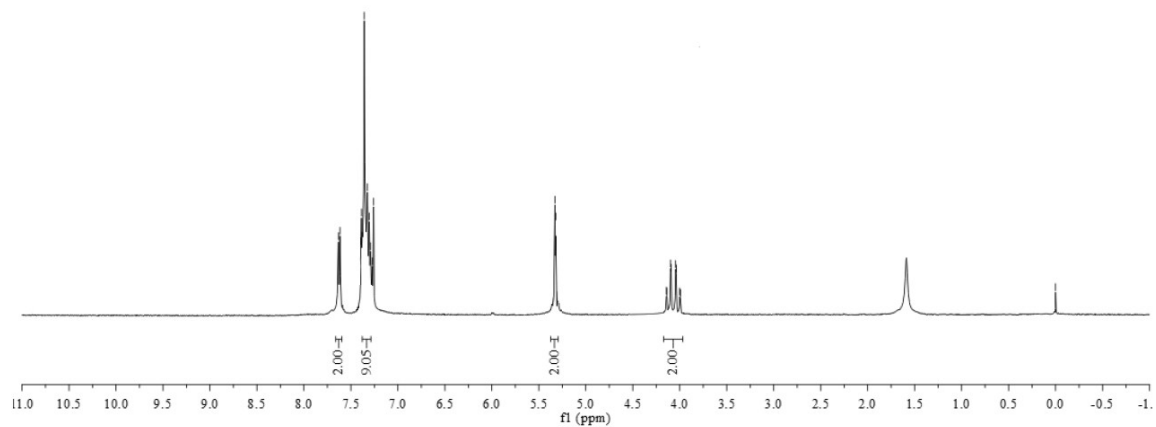

zxy1080 c13 cdcl3

164.082  
143.191  
134.065  
131.908  
129.412  
129.321  
128.885  
127.404  
126.657  
77.318  
77.000  
76.687  
70.640  
53.384  
21.252

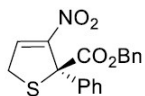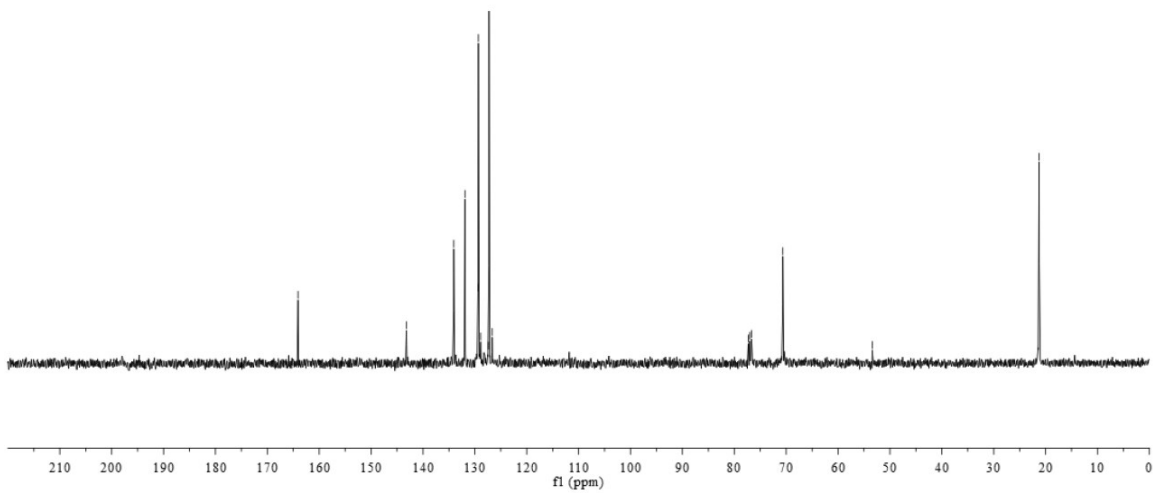

zxy1077 cdcl3

7.680  
7.682  
7.394  
7.338  
7.319  
7.296  
7.278  
7.262  
5.251  
5.235  
5.220  
5.204  
5.188  
4.161  
4.154  
4.116  
4.109  
4.073  
4.066  
4.028  
4.021  
1.347  
1.332  
1.294  
1.278  
-0.000

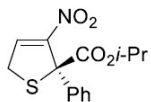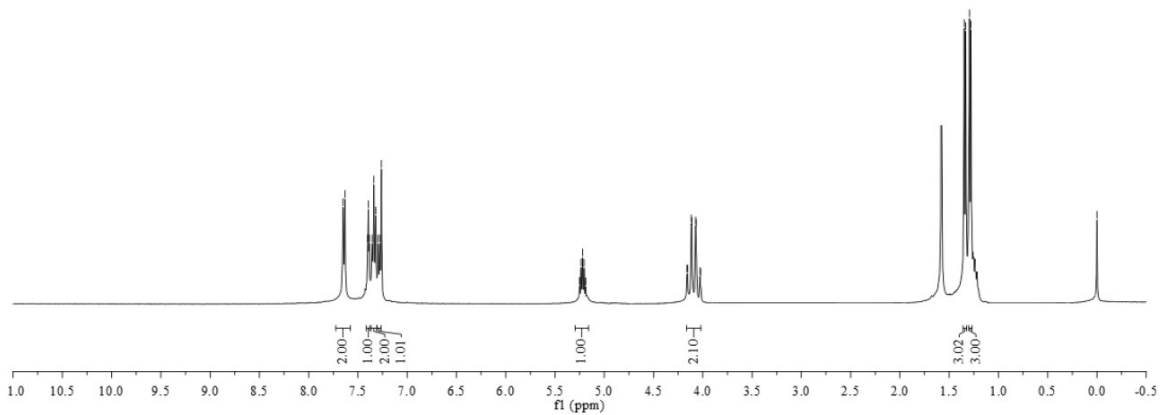

zxy1077 c13 cdcl3

168.773  
153.741  
137.546  
128.611  
128.015  
127.886  
120.275  
77.319  
77.000  
76.681  
70.305  
66.042  
33.109  
21.286

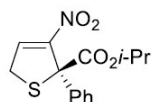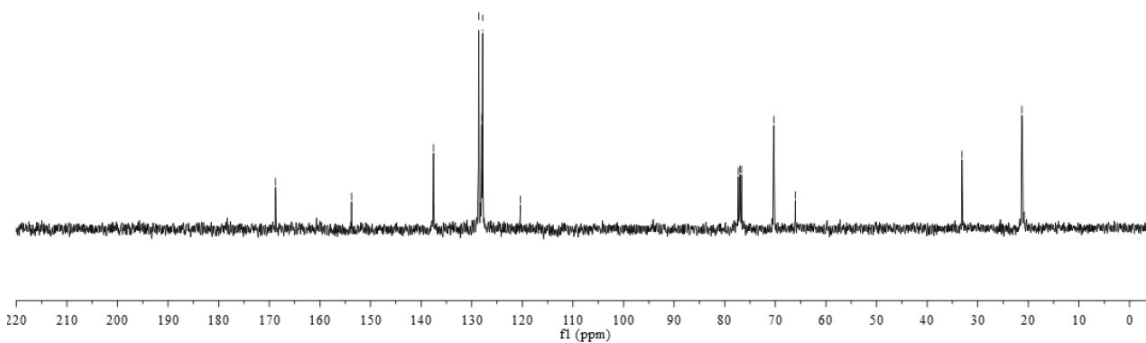

zxy1079 cdcl3

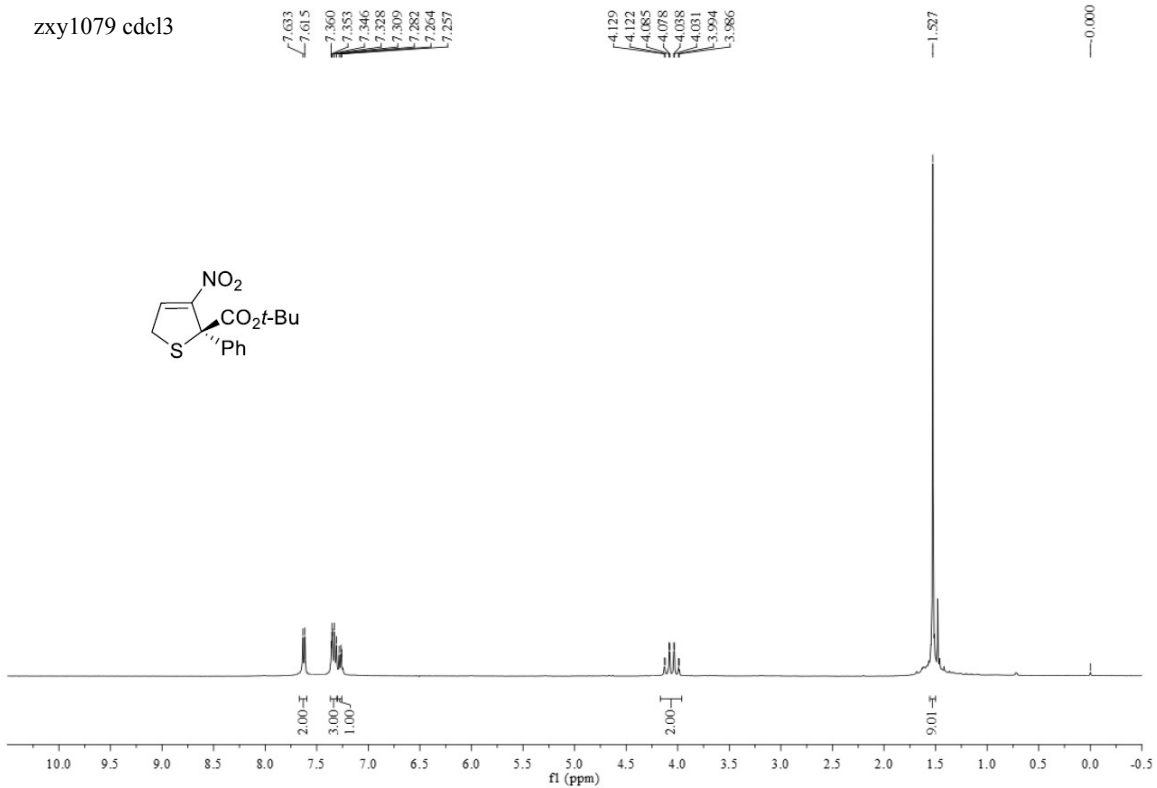

zxy1079 c13 cdcl3

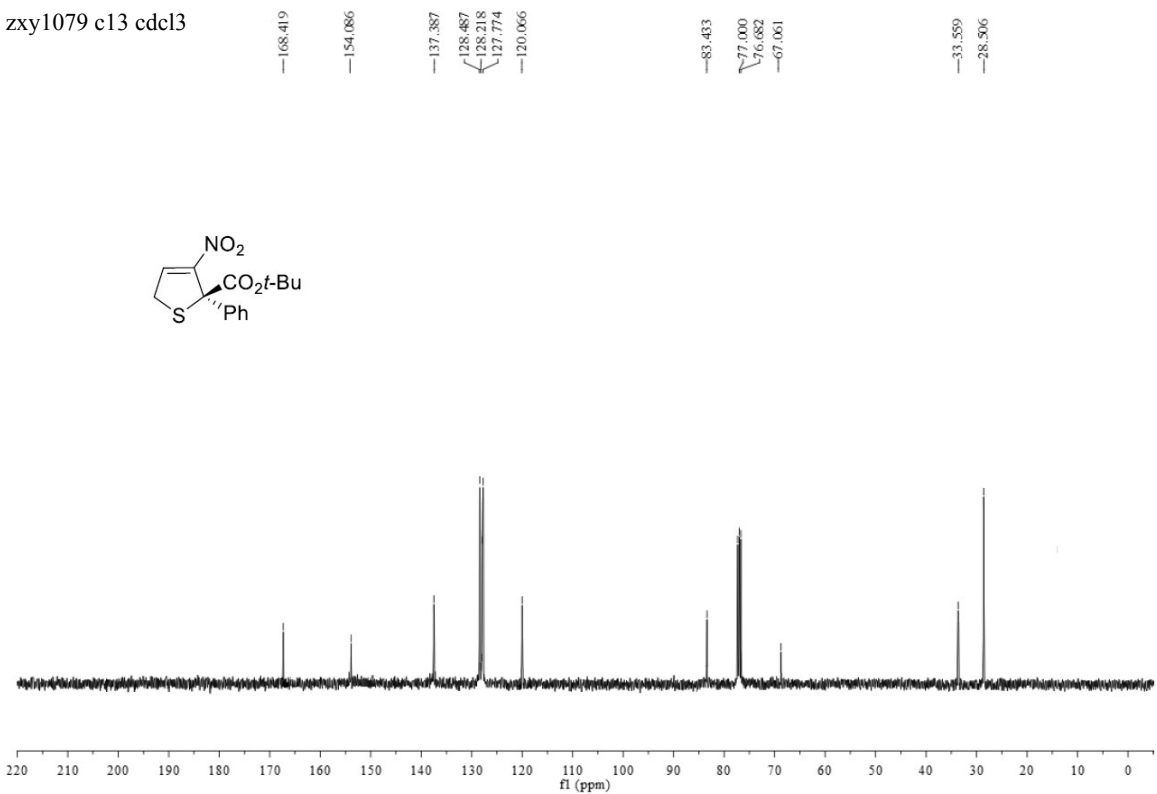

zxy1203 cdcl3

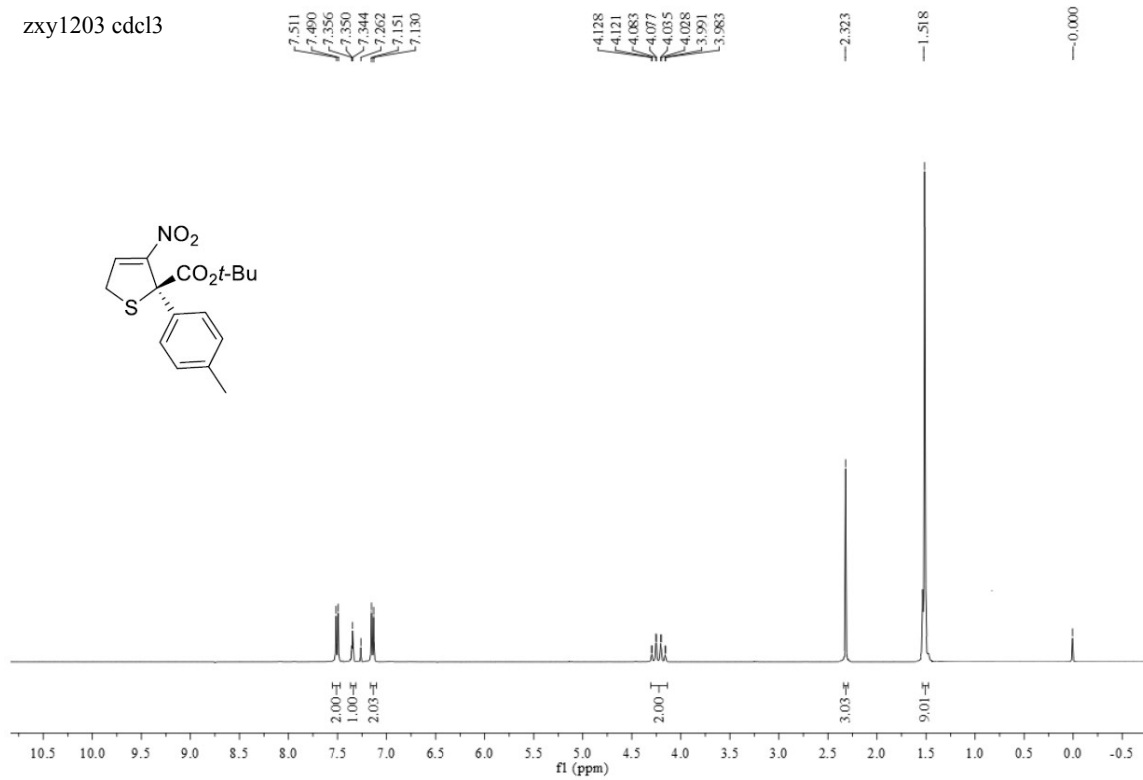

zxy1203 c13 cdcl3

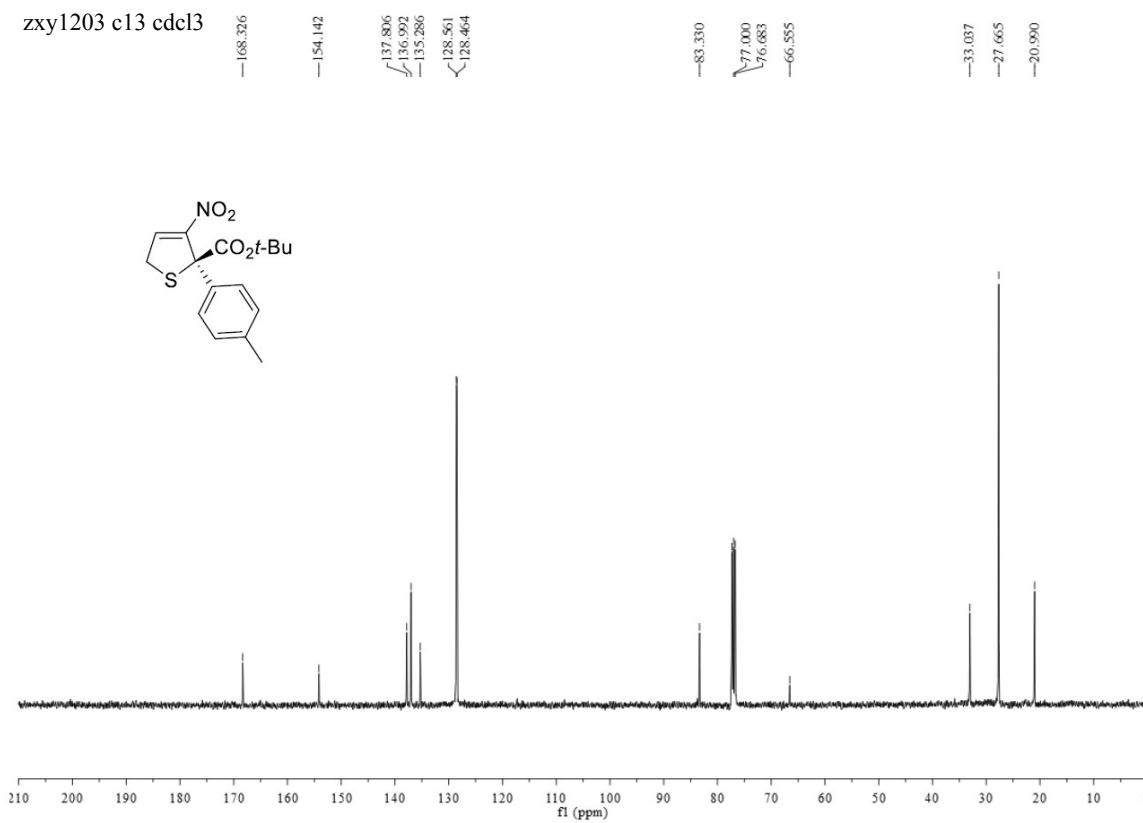

zxy1200 cdcl3

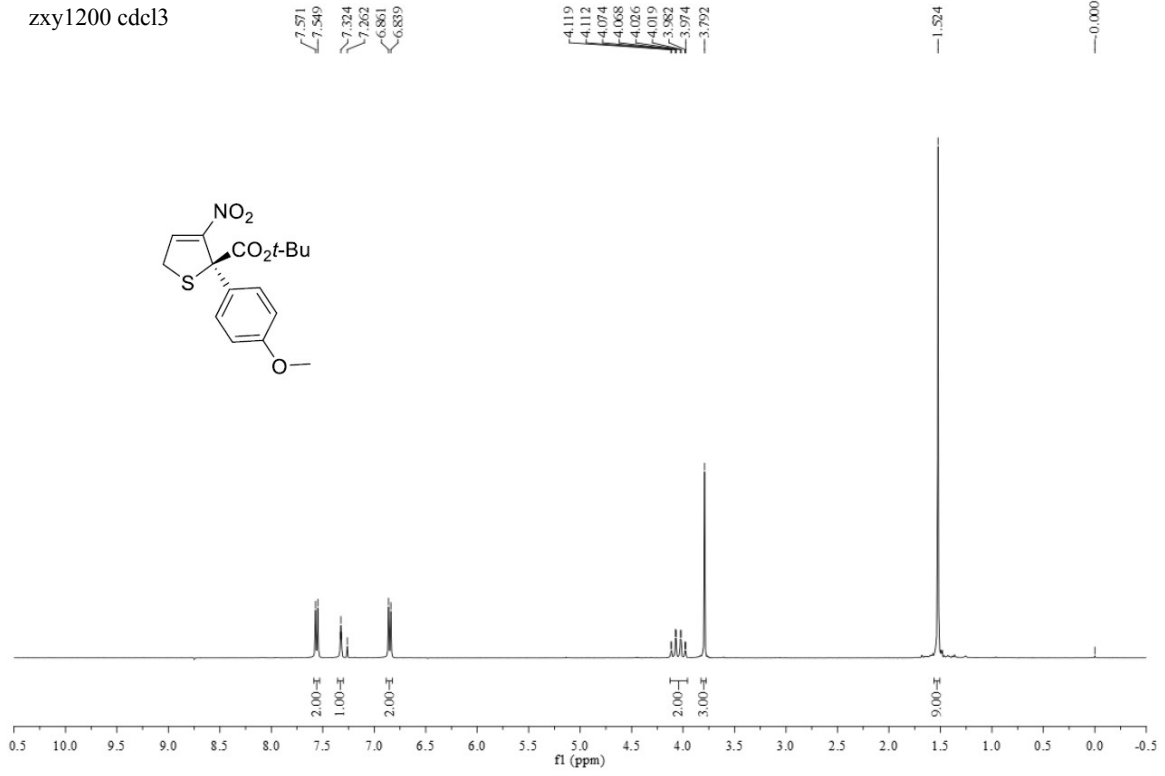

zxy1200 c13 cdcl3

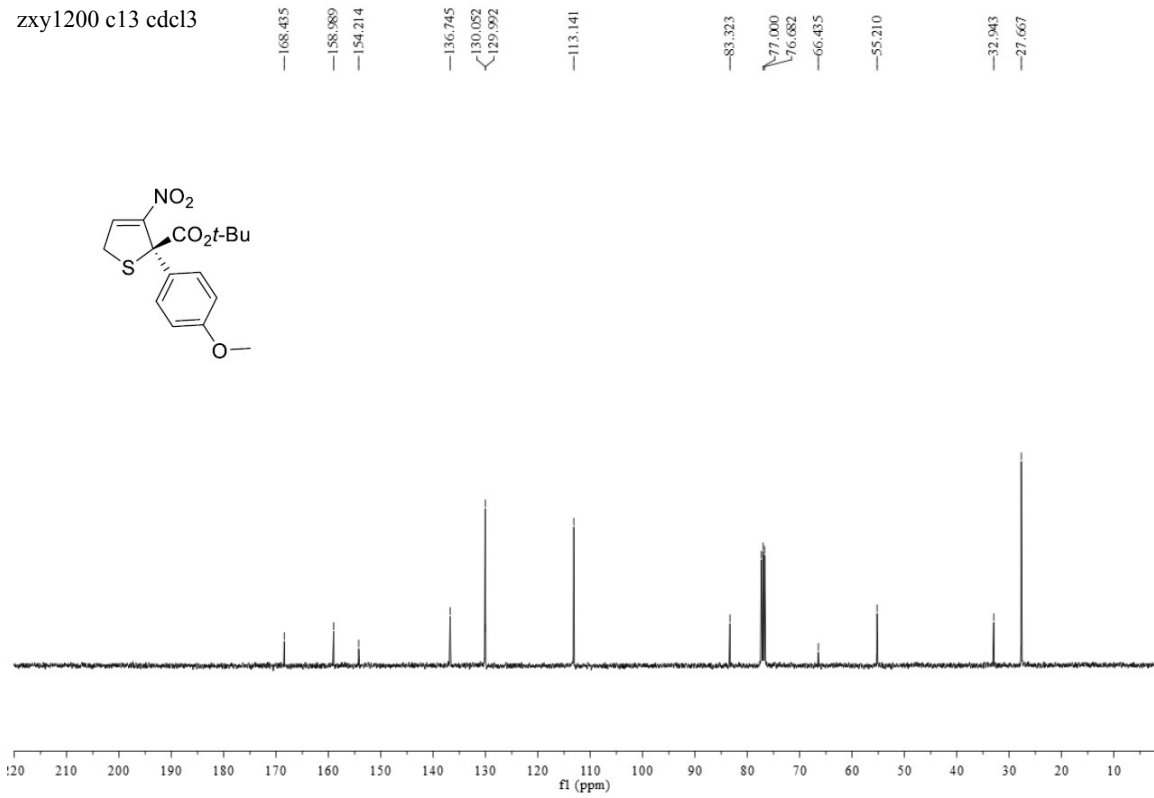

zxy1257 cdcl3

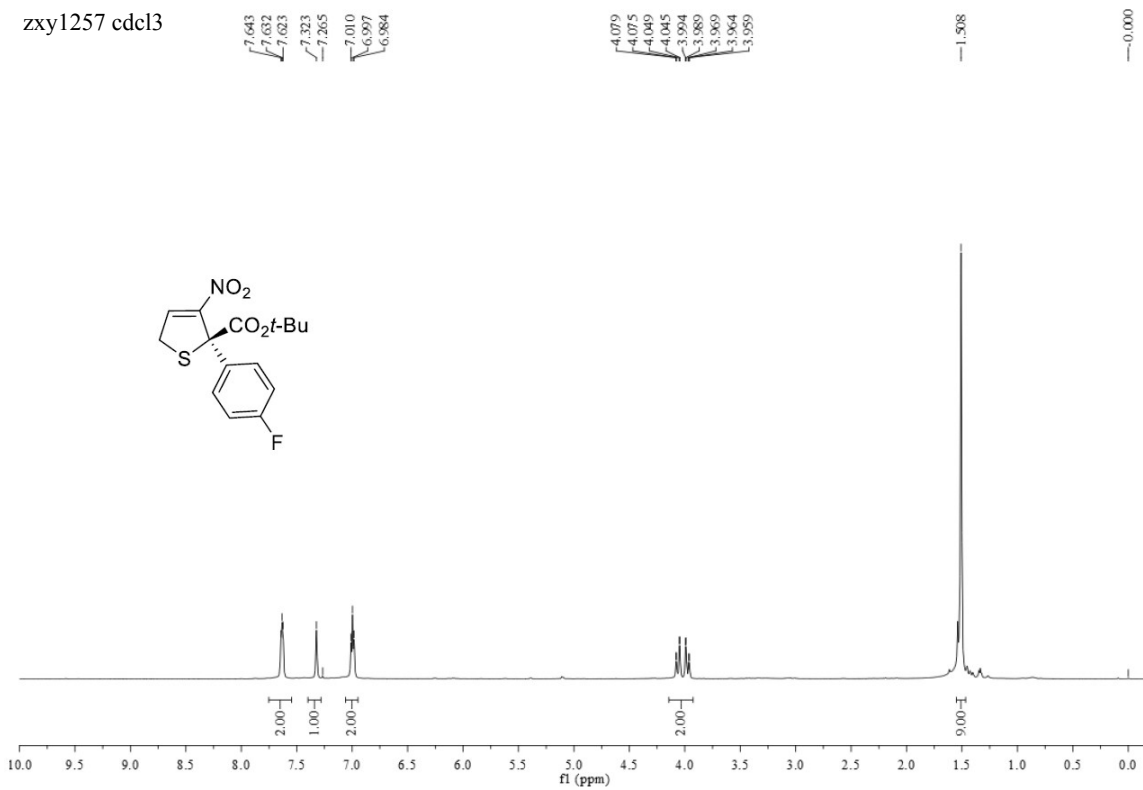

zxy1257 c13 cdcl3

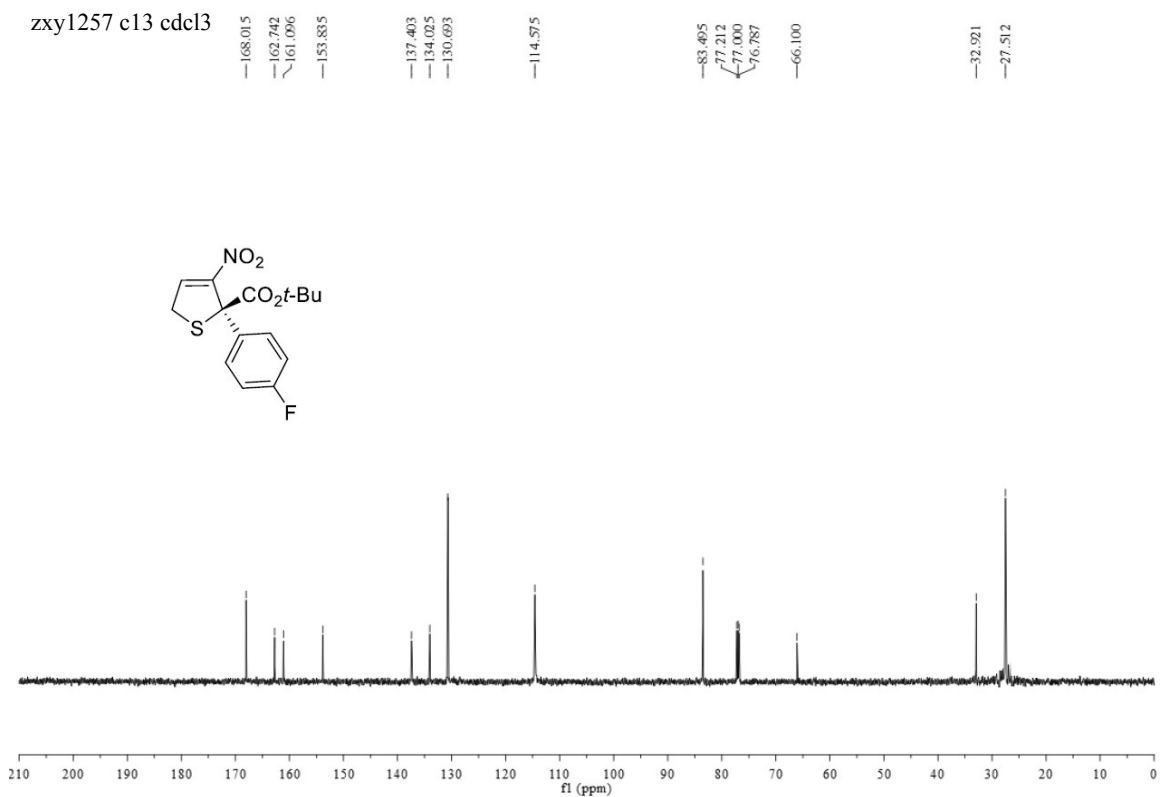

zxy1256 cdcl3

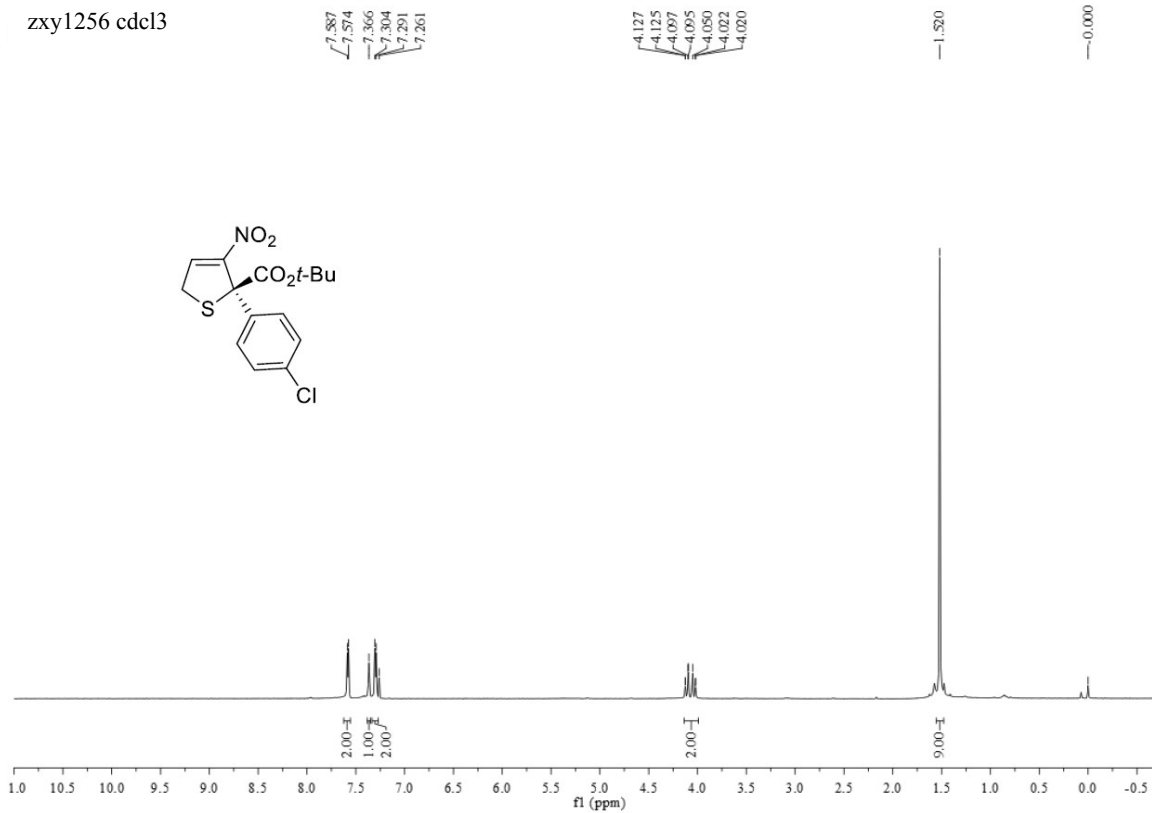

zxy1256 c13 cdcl3

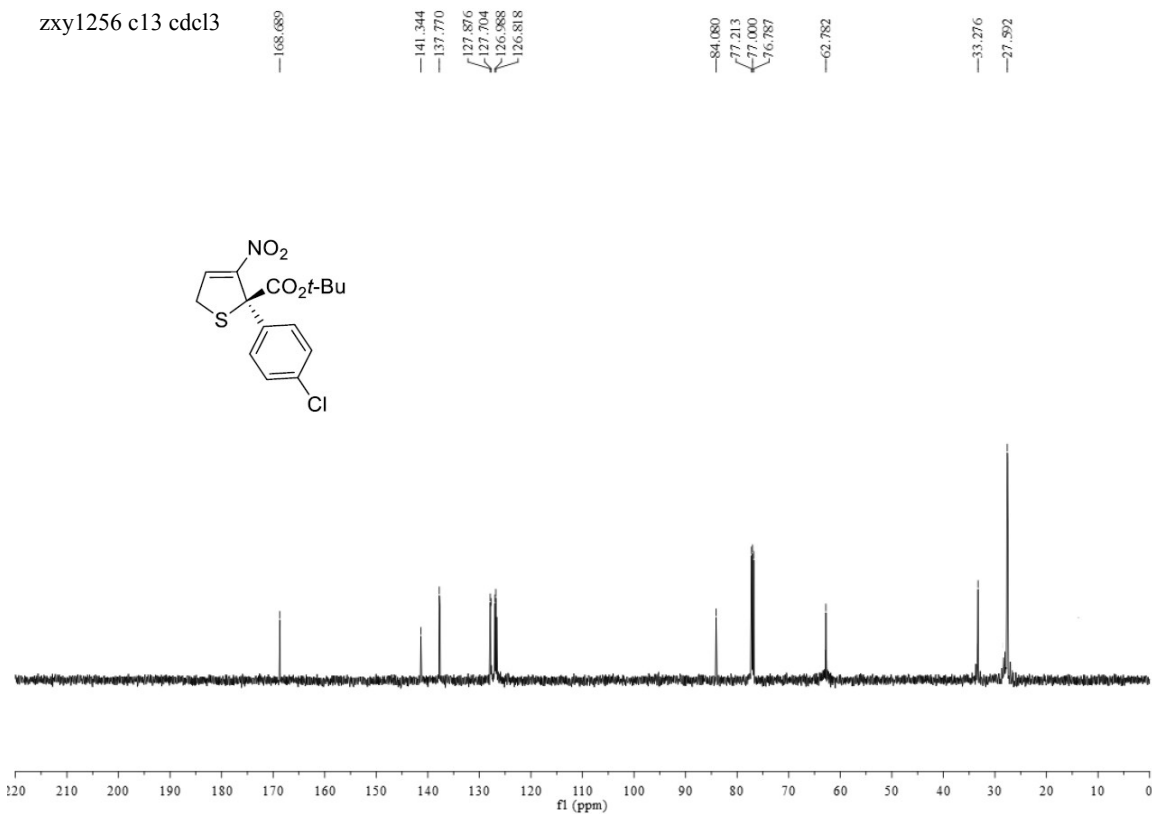



zxy1254 cdcl3

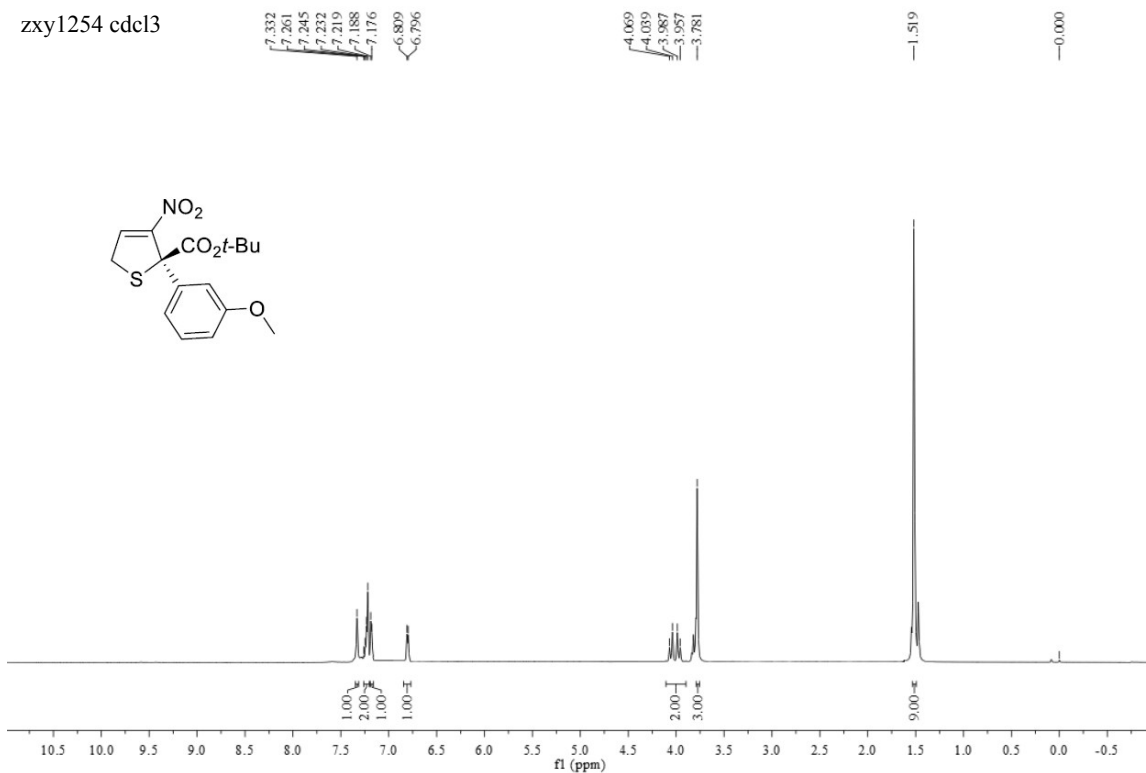

zxy1254 c13 cdcl3

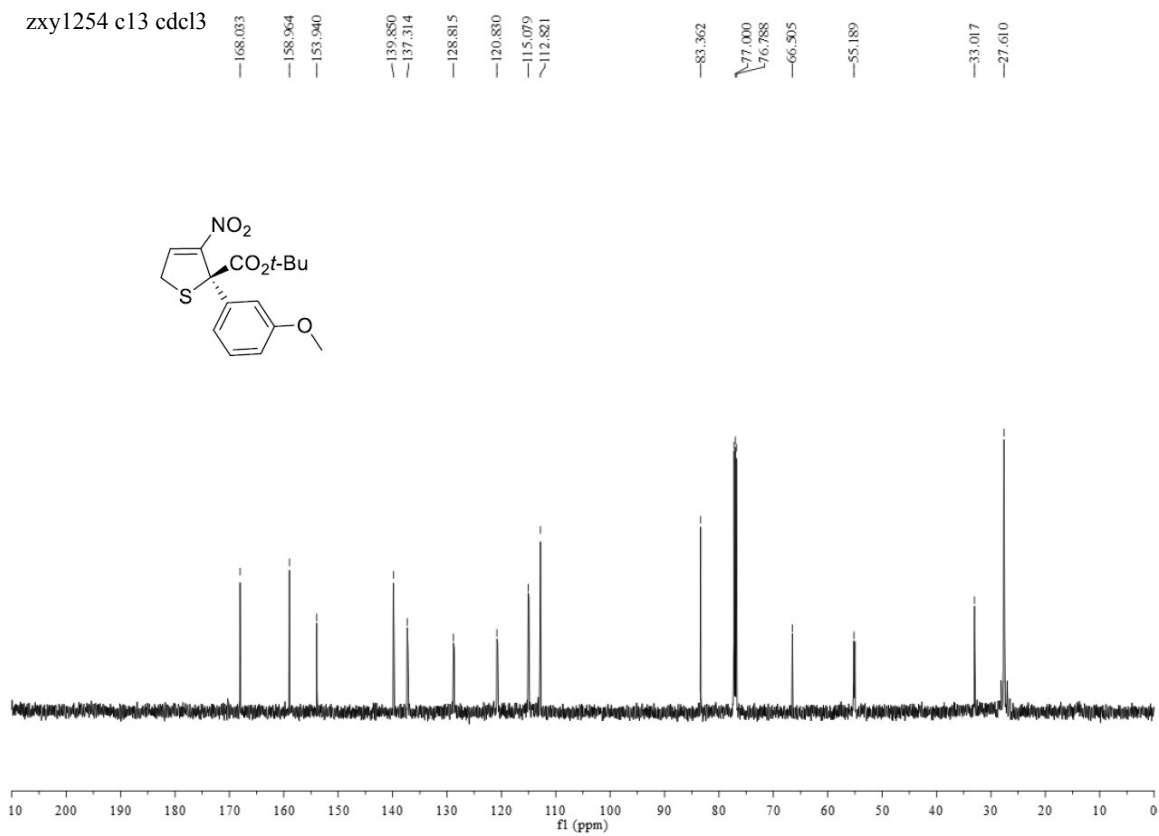

zxy1237 cdcl3

7.337  
7.256  
7.199  
6.895

4.082  
4.078  
4.052  
4.048  
3.993  
3.989  
3.964  
3.960

2.297

1.519

0.000

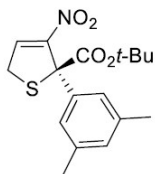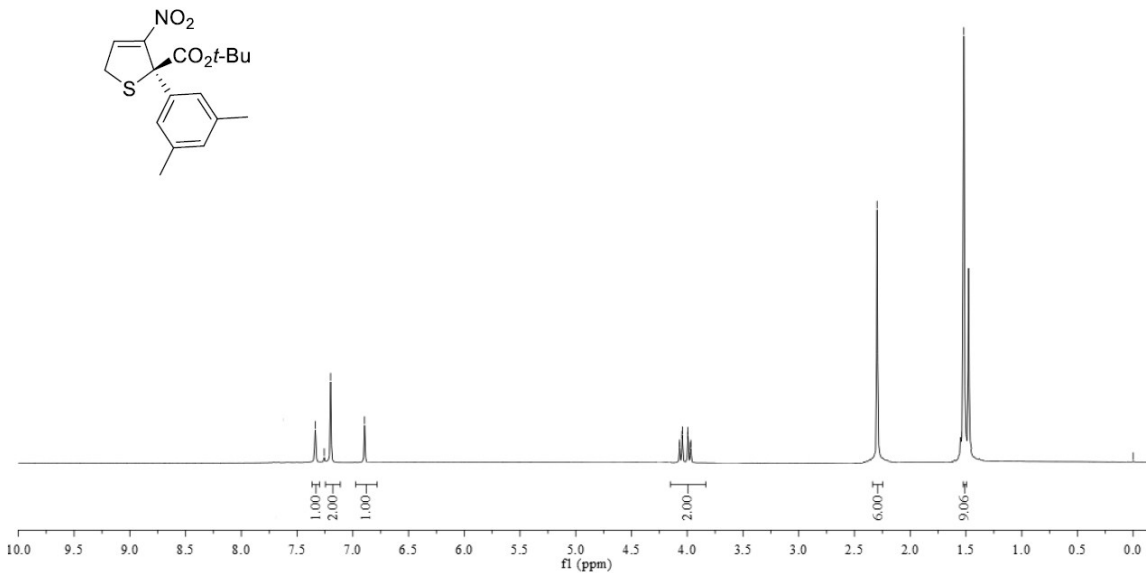

zxy1237 c13 cdcl3

168.196

154.108

137.224

130.965

129.933

129.524

126.169

83.141

77.212

76.787

66.473

33.035

27.641

21.399

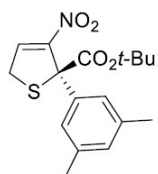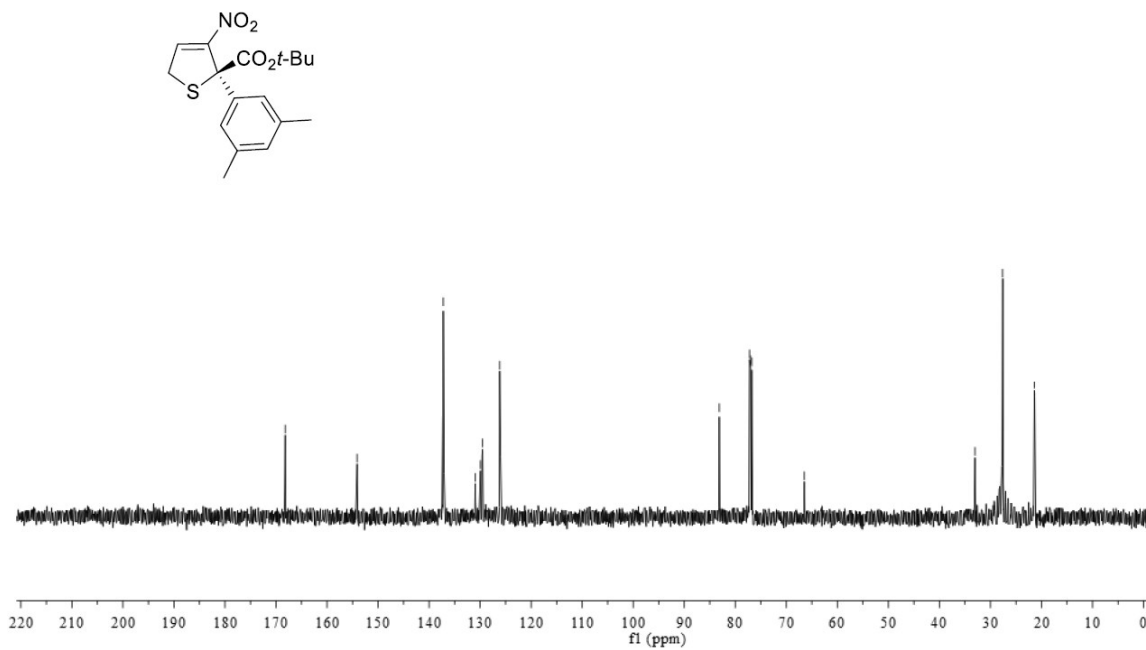

zxy1261 cdcl3

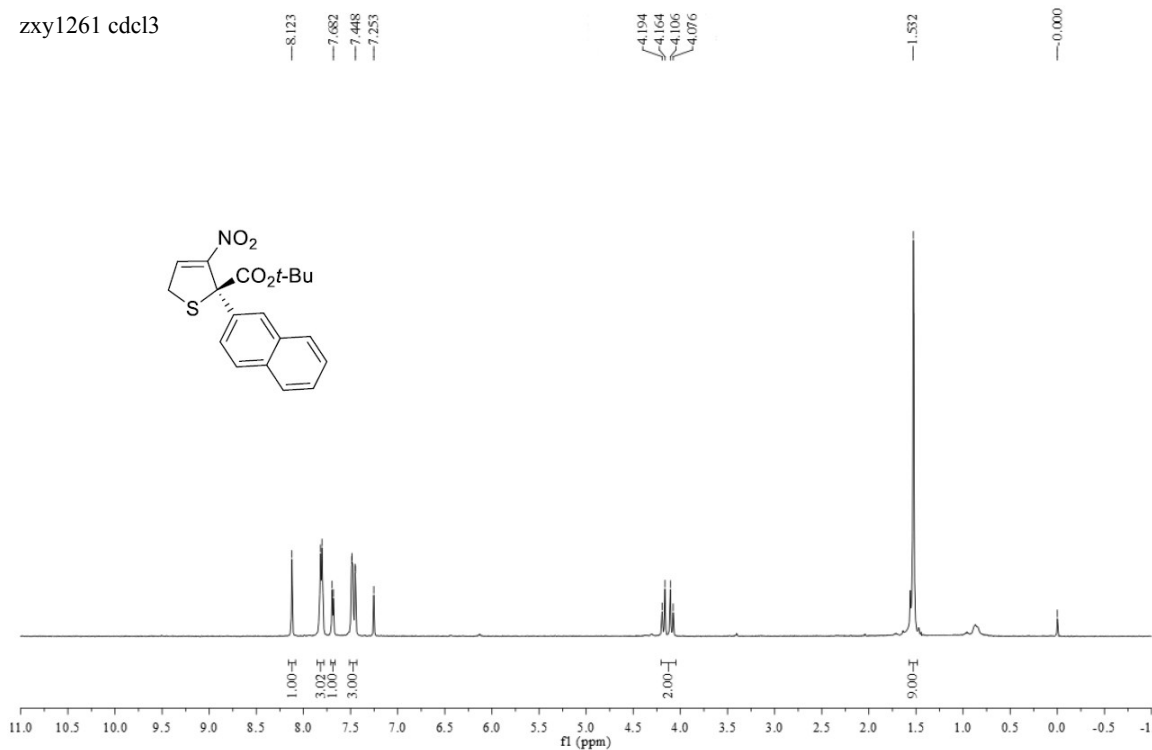

zxy1261 c13 cdcl3

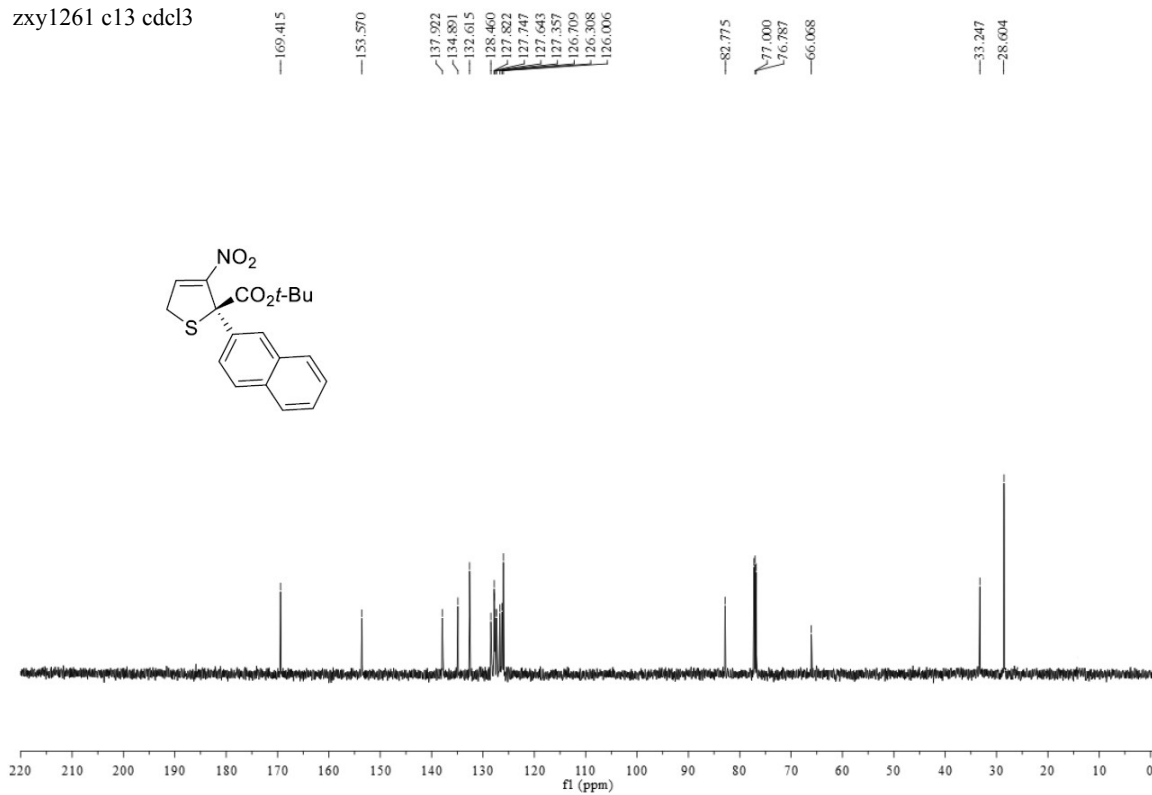

zxy1238 cdcl3

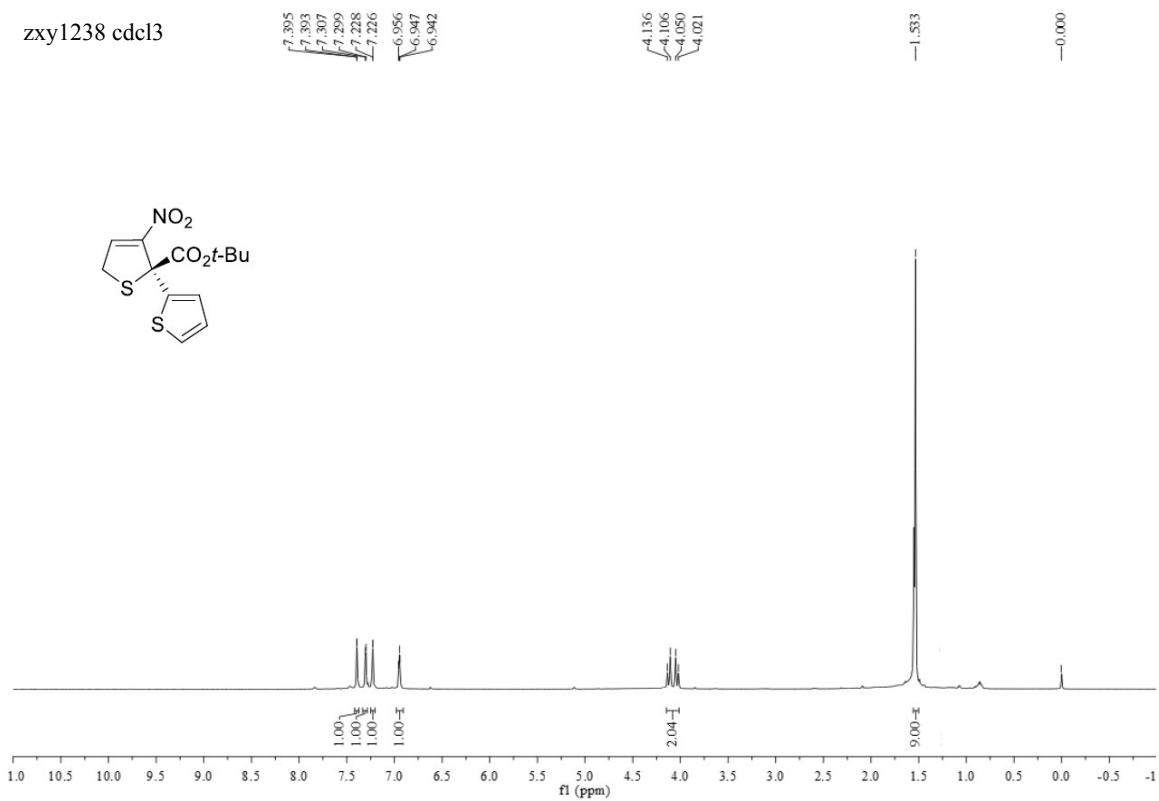

zxy1238 c13 cdcl3

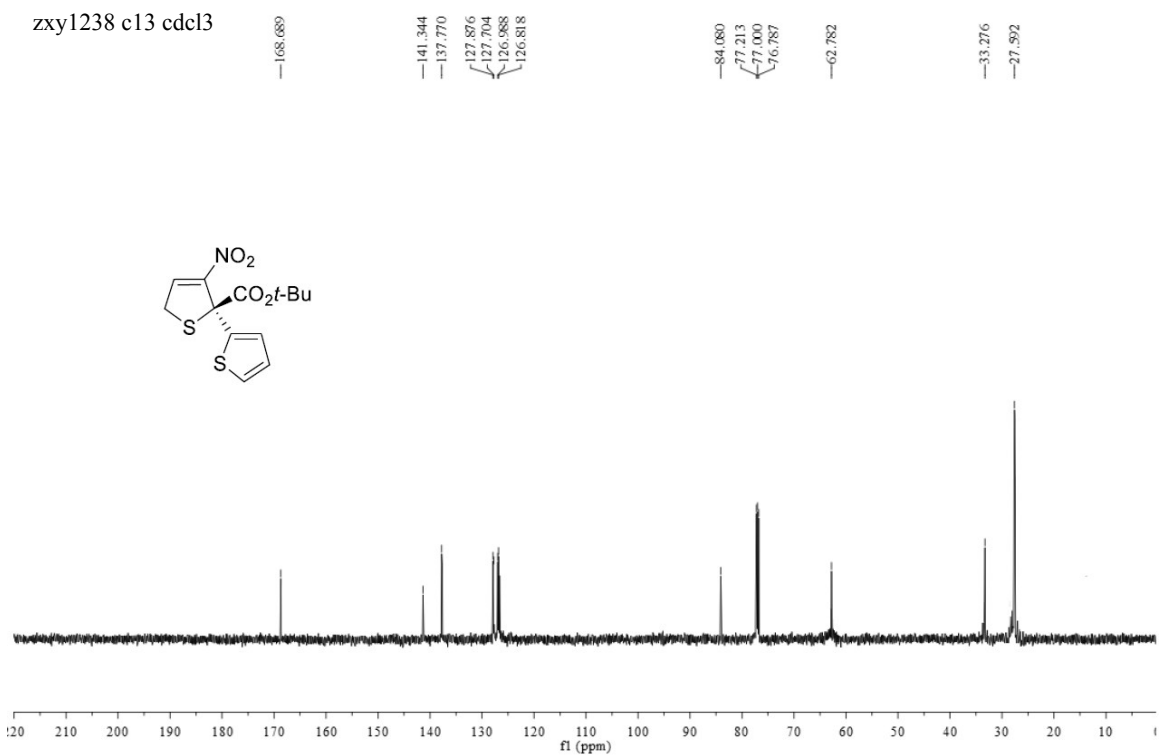

ZXY1260 cdc13

7.262  
7.200  
7.182

4.005  
3.998  
3.962  
3.956  
3.919  
3.912  
3.876  
3.870

2.258  
2.240  
2.225  
2.209  
2.192

1.511  
1.053  
1.050  
1.036  
1.032

0.000

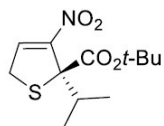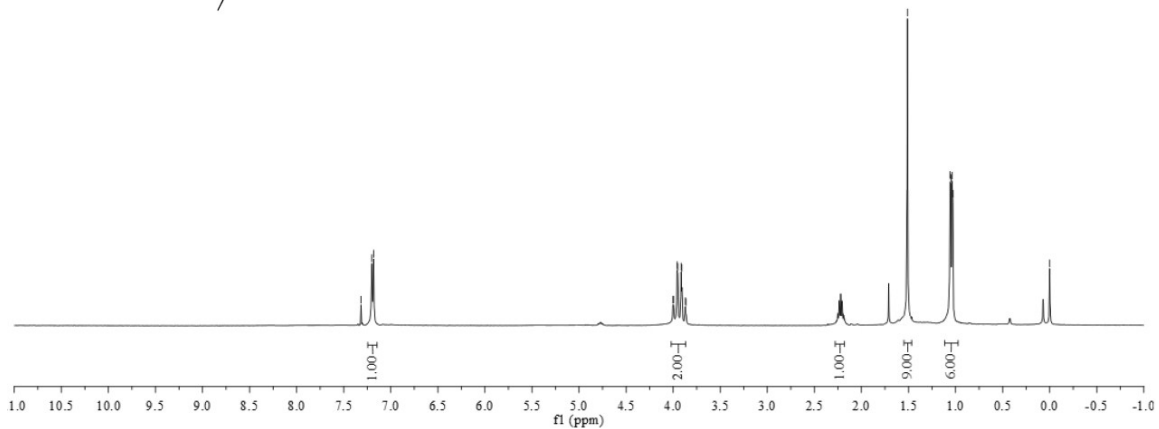

ZXY1260 C13 CDCl3

164.602

154.271

123.917

84.809

77.000  
76.683

70.542

33.242

27.674  
26.957

16.752

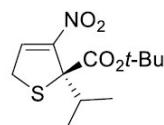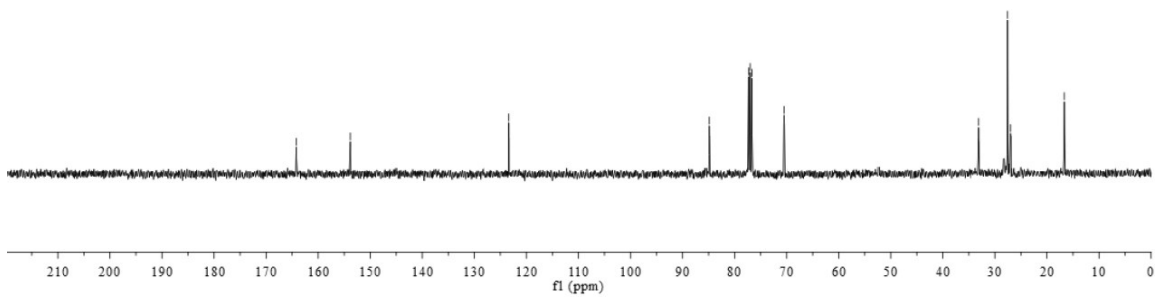

zxy1178 cdcl3

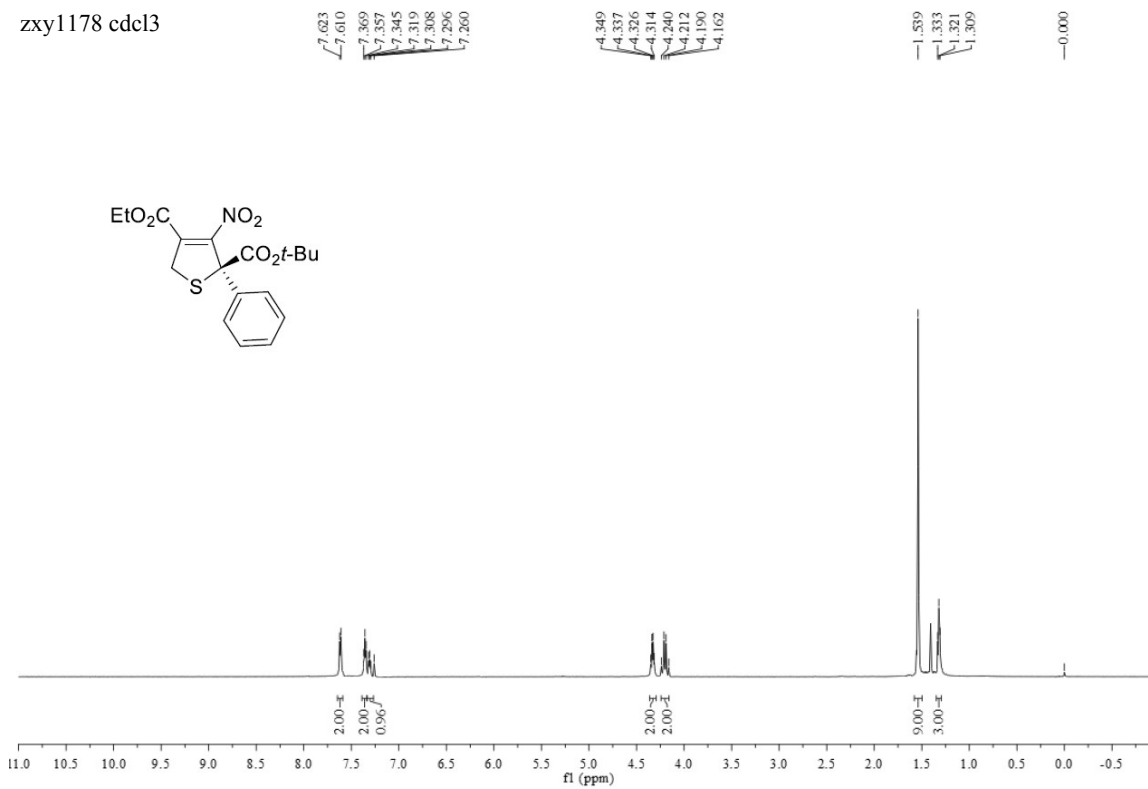

zxy1178 c13 cdcl3

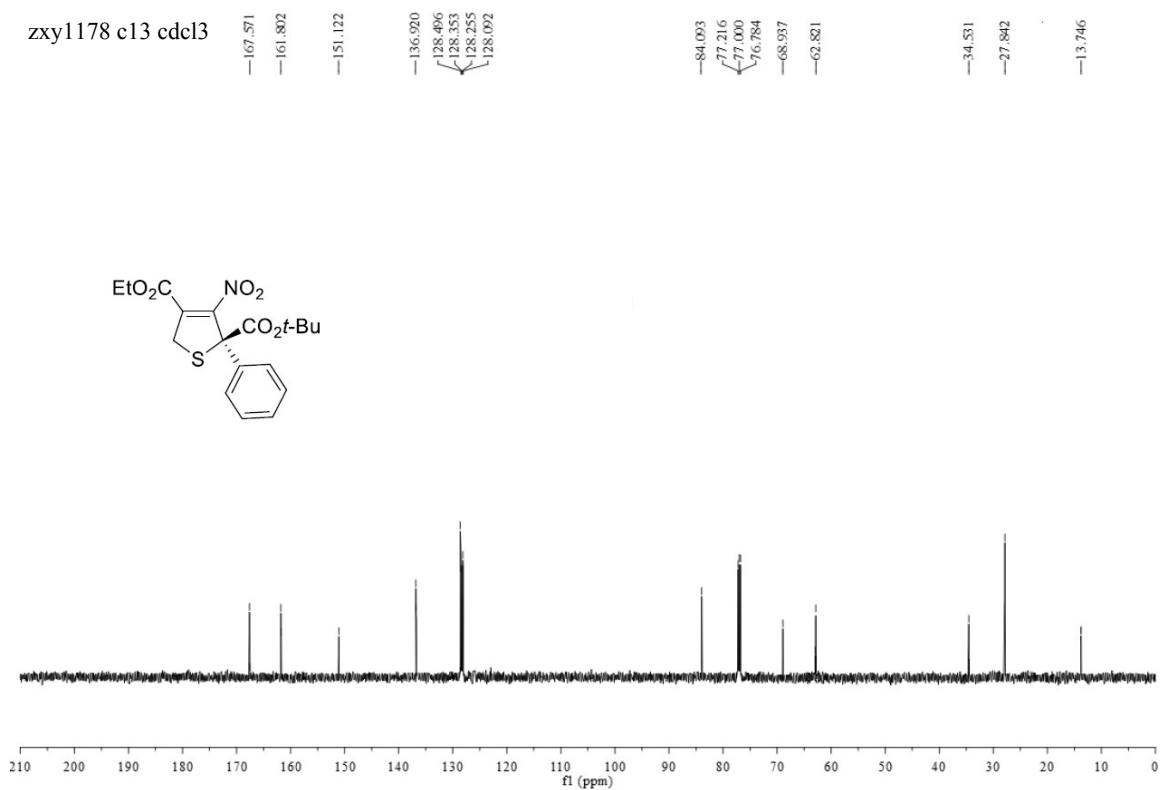

zxy1249 cdcl3

7.257  
7.189  
6.932

4.341  
4.329  
4.318  
4.306  
4.216  
4.188  
4.162  
4.134

2.308

1.572  
1.328  
1.316  
1.304

0.000

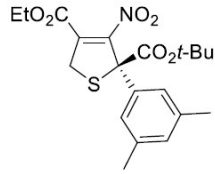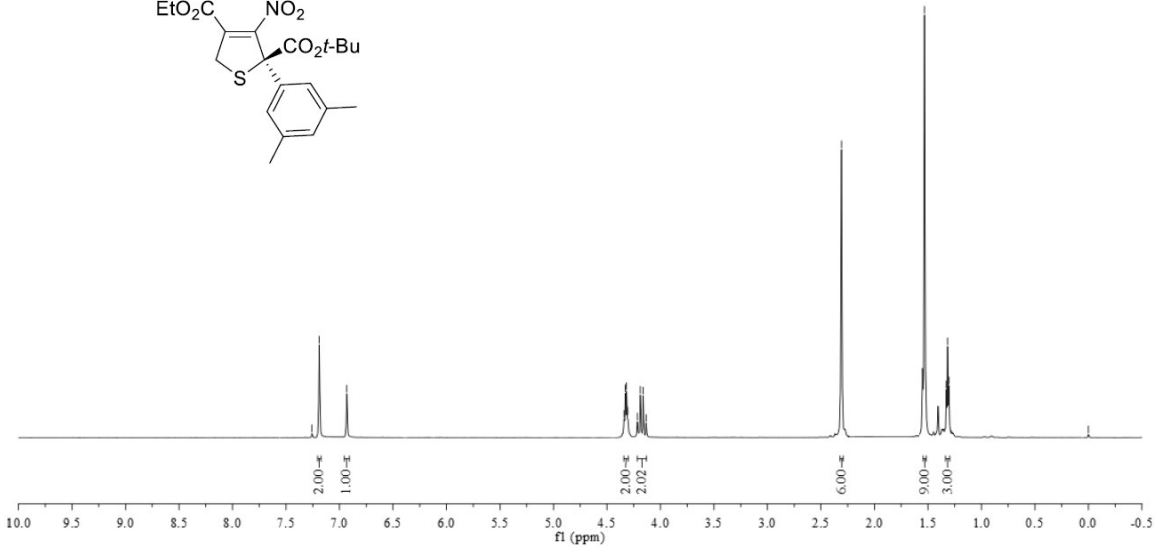

zxy1249 c13 cdcl3

167.616  
161.797  
151.282

137.640  
136.889  
130.115  
126.081  
125.509

83.758  
77.212  
77.000  
76.788  
68.734  
62.652

34.334  
27.570  
21.363  
13.637

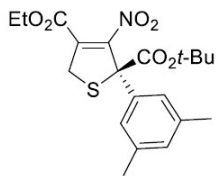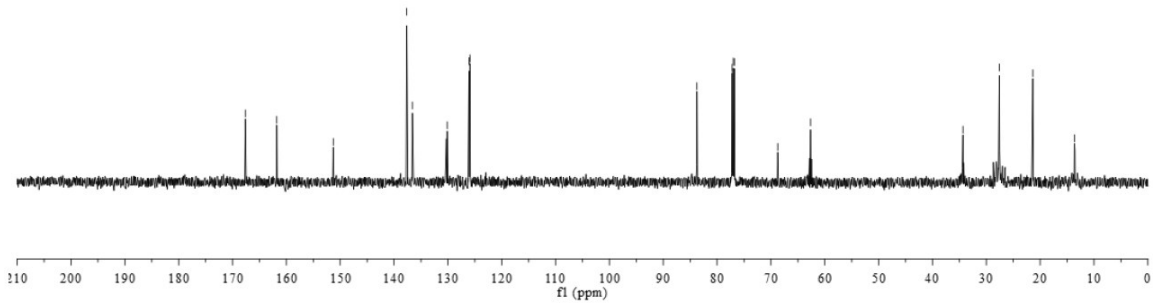

zxy1158 cdcl3

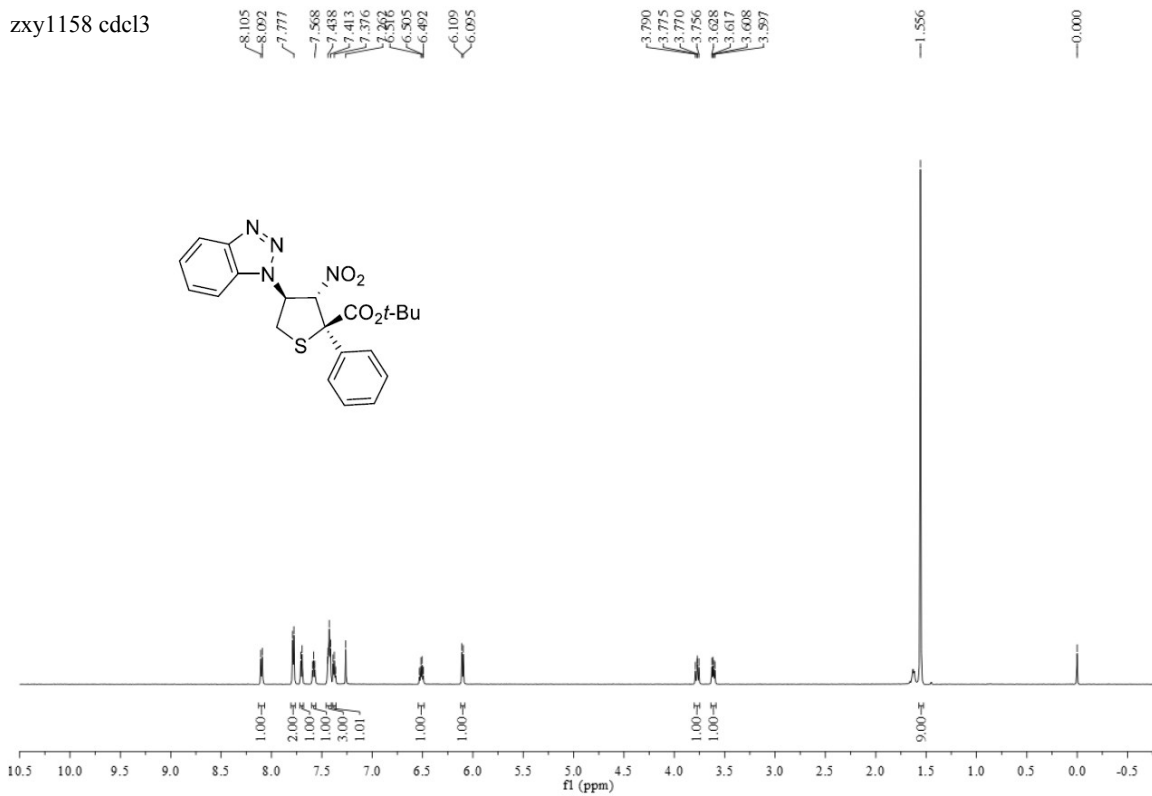

zxy1158 c13 cdcl3

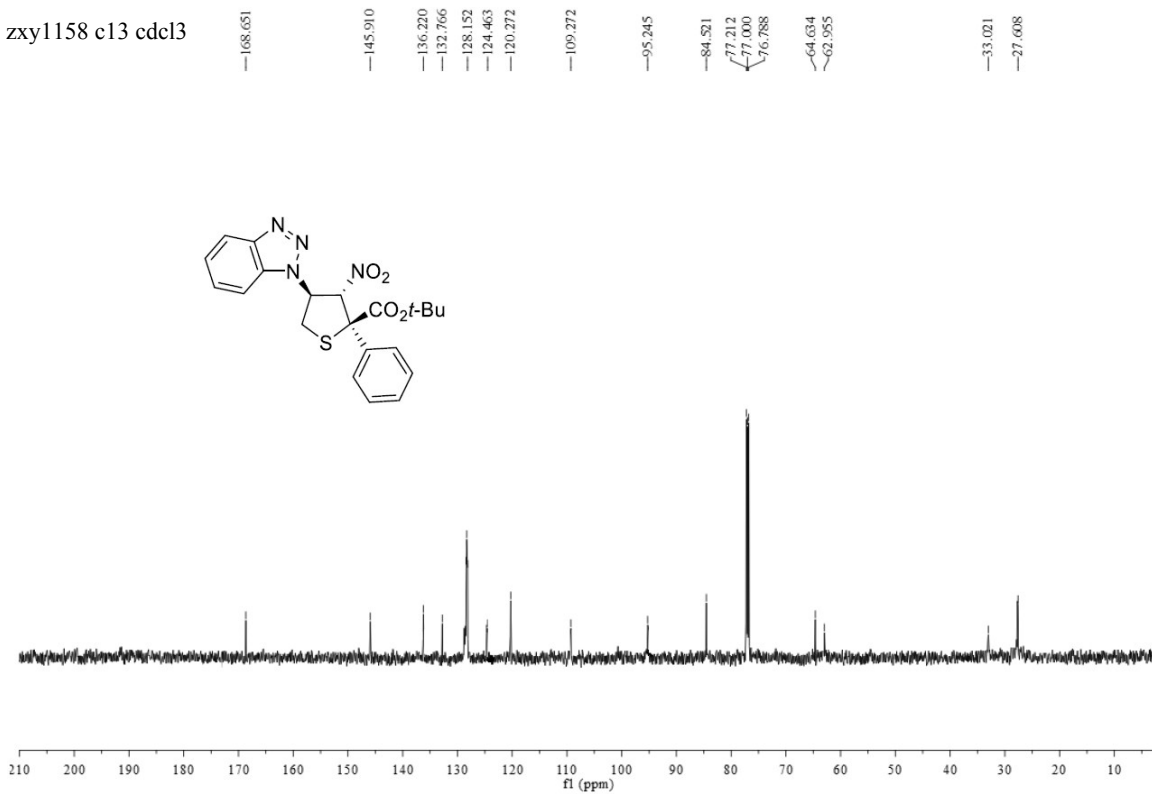

Supplement: c8ra04325f1.pdf [file c8ra04325f1.pdf]
